# Supplementary material for: Frequent Gain and Loss of Functional Transcription Factor Binding Sites
Source: PLoS Comput Biol. 2007 May 25;3(5):e99. doi: 10.1371/journal.pcbi.0030099 (PMC1876492; doi:10.1371/journal.pcbi.0030099)
Supplement: Table S1 — (1.3 MB XLS) [file pcbi.0030099.st001.xls]

I	Conserved	Doniger and Fay	33022	33030	1	+	.	Binding "RCS1 conserved 9"
I	Conserved	Doniger and Fay	33168	33174	1	+	.	Binding "GAT1 conserved 10"
I	Conserved	Doniger and Fay	33169	33173	1	+	.	Binding "DAL80 conserved 11"
I	Conserved	Doniger and Fay	33169	33175	1	+	.	Binding "DAL82 conserved 12"
I	Conserved	Doniger and Fay	33169	33177	1	+	.	Binding "GLN3 conserved 13"
I	Conserved	Doniger and Fay	33169	33174	1	+	.	Binding "GZF3 conserved 14"
I	Conserved	Doniger and Fay	34944	34949	1	+	.	Binding "ADR1 conserved 15"
I	Conserved	Doniger and Fay	34972	34976	1	+	.	Binding "DAL80 conserved 16"
I	Conserved	Doniger and Fay	34985	34996	1	-	.	Binding "RLR1 conserved 17"
I	Conserved	Doniger and Fay	39094	39100	1	-	.	Binding "REB1 conserved 18"
I	Conserved	Doniger and Fay	39188	39192	1	+	.	Binding "DAL80 conserved 19"
I	Conserved	Doniger and Fay	39188	39194	1	+	.	Binding "DAL82 conserved 20"
I	Conserved	Doniger and Fay	39188	39196	1	+	.	Binding "GLN3 conserved 21"
I	Conserved	Doniger and Fay	39242	39248	1	-	.	Binding "TEC1 conserved 22"
I	Conserved	Doniger and Fay	45144	45153	1	+	.	Binding "UME6 conserved 23"
I	Conserved	Doniger and Fay	45164	45171	1	+	.	Binding "SPT23 conserved 24"
I	Conserved	Doniger and Fay	45182	45190	1	+	.	Binding "RPN4 conserved 25"
I	Conserved	Doniger and Fay	45236	45248	1	+	.	Binding "STP1 conserved 26"
I	Conserved	Doniger and Fay	45238	45246	1	+	.	Binding "SKN7 conserved 27"
I	Conserved	Doniger and Fay	45241	45250	1	-	.	Binding "UME6 conserved 28"
I	Conserved	Doniger and Fay	45295	45299	1	+	.	Binding "DAL80 conserved 29"
I	Conserved	Doniger and Fay	45295	45303	1	+	.	Binding "GLN3 conserved 30"
I	Conserved	Doniger and Fay	45321	45333	1	+	.	Binding "ABF1 conserved 31"
I	Conserved	Doniger and Fay	45437	45449	1	+	.	Binding "SIP4 conserved 32"
I	Conserved	Doniger and Fay	45442	45448	1	-	.	Binding "RGT1 conserved 33"
I	Conserved	Doniger and Fay	45480	45486	1	+	.	Binding "CBF1 conserved 34"
I	Conserved	Doniger and Fay	45481	45487	1	+	.	Binding "PHO4 conserved 35"
I	Semi-conserved	Doniger and Fay	45520	45526	1	-	.	Binding "PHO4 loss on Scer 36"
I	Semi-conserved	Doniger and Fay	45521	45527	1	-	.	Binding "CBF1 loss on Scer 37"
I	Semi-conserved	Doniger and Fay	45554	45560	1	+	.	Binding "REB1 loss on Smik with turnover -9 bp away 38"
I	Conserved	Doniger and Fay	45590	45601	1	+	.	Binding "RLR1 conserved 39"
I	Conserved	Doniger and Fay	45614	45623	1	+	.	Binding "RLM1 conserved 40"
I	Conserved	Doniger and Fay	45630	45636	1	-	.	Binding "DIG1 conserved 41"
I	Conserved	Doniger and Fay	45663	45668	1	-	.	Binding "SWI5 conserved 42"
I	Conserved	Doniger and Fay	48253	48263	1	+	.	Binding "SPT2 conserved 43"
I	Conserved	Doniger and Fay	48281	48288	1	+	.	Binding "CIN5 conserved 44"
I	Conserved	Doniger and Fay	48348	48359	1	+	.	Binding "RLR1 conserved 45"
I	Conserved	Doniger and Fay	48349	48353	1	-	.	Binding "DAL80 conserved 46"
I	Conserved	Doniger and Fay	48361	48370	1	-	.	Binding "RAP1 conserved 47"
I	Conserved	Doniger and Fay	48367	48381	1	-	.	Binding "MET4 conserved 48"
I	Conserved	Doniger and Fay	48387	48391	1	+	.	Binding "DAL80 conserved 49"
I	Conserved	Doniger and Fay	48464	48473	1	-	.	Binding "NDT80 conserved 50"
I	Conserved	Doniger and Fay	48469	48475	1	+	.	Binding "CBF1 conserved 51"
I	Conserved	Doniger and Fay	48469	48474	1	-	.	Binding "SKO1 conserved 52"
I	Conserved	Doniger and Fay	48510	48521	1	-	.	Binding "FKH2 conserved 53"
I	Conserved	Doniger and Fay	51709	51716	1	-	.	Binding "SPT23 conserved (Convergent, not counted) 54"
I	Conserved	Doniger and Fay	56915	56925	1	+	.	Binding "HAP1 conserved 55"
I	Conserved	Doniger and Fay	56920	56929	1	-	.	Binding "STB1 conserved 56"
I	Conserved	Doniger and Fay	56920	56928	1	-	.	Binding "SWI4 conserved 57"
I	Conserved	Doniger and Fay	56920	56927	1	+	.	Binding "SWI6 conserved 58"
I	Conserved	Doniger and Fay	56922	56928	1	-	.	Binding "MBP1 conserved 59"
I	Conserved	Doniger and Fay	56931	56936	1	-	.	Binding "YHP1 conserved 60"
I	Conserved	Doniger and Fay	56942	56952	1	-	.	Binding "SPT2 conserved 61"
I	Conserved	Doniger and Fay	57930	57937	1	-	.	Binding "CIN5 conserved (Convergent, not counted) 62"
I	Conserved	Doniger and Fay	58502	58512	1	+	.	Binding "SPT2 conserved 63"
I	Conserved	Doniger and Fay	58505	58514	1	+	.	Binding "RLM1 conserved 64"
I	Conserved	Doniger and Fay	58534	58539	1	+	.	Binding "BAS1 conserved 65"
I	Conserved	Doniger and Fay	58534	58540	1	+	.	Binding "GCN4 conserved 66"
I	Conserved	Doniger and Fay	58550	58555	1	+	.	Binding "BAS1 conserved 67"
I	Conserved	Doniger and Fay	58550	58556	1	+	.	Binding "GCN4 conserved 68"
I	Conserved	Doniger and Fay	62660	62672	1	+	.	Binding "ABF1 conserved 69"
I	Conserved	Doniger and Fay	62706	62717	1	+	.	Binding "FKH2 conserved 70"
I	Conserved	Doniger and Fay	62741	62747	1	+	.	Binding "TEC1 conserved 71"
I	Conserved	Doniger and Fay	65448	65459	1	+	.	Binding "THI2 conserved (Convergent, not counted) 72"
I	Semi-conserved	Doniger and Fay	65690	65701	1	-	.	Binding "RLR1 loss on Smik with turnover 51 bp away (Convergent, not counted) 73"
I	Conserved	Doniger and Fay	67533	67538	1	-	.	Binding "GZF3 conserved 74"
I	Conserved	Doniger and Fay	67798	67810	1	+	.	Binding "MCM1 conserved 75"
I	Conserved	Doniger and Fay	67798	67810	1	+	.	Binding "NDD1 conserved 76"
I	Conserved	Doniger and Fay	67837	67842	1	+	.	Binding "ASH1 conserved 77"
I	Conserved	Doniger and Fay	67846	67852	1	-	.	Binding "GCN4 conserved 78"
I	Conserved	Doniger and Fay	67956	67965	1	+	.	Binding "RLM1 conserved 79"
I	Conserved	Doniger and Fay	68008	68020	1	-	.	Binding "MCM1 conserved 80"
I	Conserved	Doniger and Fay	68099	68110	1	-	.	Binding "SIG1 conserved 81"
I	Conserved	Doniger and Fay	68106	68111	1	-	.	Binding "MOT3 conserved 82"
I	Conserved	Doniger and Fay	68124	68135	1	+	.	Binding "RLR1 conserved 83"
I	Conserved	Doniger and Fay	68217	68222	1	+	.	Binding "SWI5 conserved 84"
I	Conserved	Doniger and Fay	68285	68290	1	-	.	Binding "SWI5 conserved 85"
I	Conserved	Doniger and Fay	68350	68356	1	+	.	Binding "RIM101 conserved 86"
I	Conserved	Doniger and Fay	68411	68423	1	+	.	Binding "MCM1 conserved 87"
I	Conserved	Doniger and Fay	68411	68423	1	+	.	Binding "NDD1 conserved 88"
I	Conserved	Doniger and Fay	68429	68438	1	-	.	Binding "RAP1 conserved 89"
I	Conserved	Doniger and Fay	68466	68478	1	-	.	Binding "MCM1 conserved 90"
I	Conserved	Doniger and Fay	68466	68478	1	-	.	Binding "NDD1 conserved 91"
I	Conserved	Doniger and Fay	68473	68483	1	-	.	Binding "HAP1 conserved 92"
I	Conserved	Doniger and Fay	68518	68523	1	-	.	Binding "SWI5 conserved 93"
I	Conserved	Doniger and Fay	68587	68591	1	+	.	Binding "DAL80 conserved 94"
I	Conserved	Doniger and Fay	68649	68656	1	-	.	Binding "SOK2 conserved 95"
I	Conserved	Doniger and Fay	68678	68684	1	-	.	Binding "RIM101 conserved 96"
I	Conserved	Doniger and Fay	68689	68698	1	+	.	Binding "SFP1 conserved 97"
I	Conserved	Doniger and Fay	71133	71138	1	-	.	Binding "AFT2 conserved 98"
I	Conserved	Doniger and Fay	71134	71143	1	-	.	Binding "RAP1 conserved 99"
I	Conserved	Doniger and Fay	71147	71155	1	+	.	Binding "GCR1 conserved 100"
I	Conserved	Doniger and Fay	71164	71176	1	+	.	Binding "HSF1 conserved 101"
I	Conserved	Doniger and Fay	71165	71173	1	+	.	Binding "ROX1 conserved 102"
I	Conserved	Doniger and Fay	71165	71176	1	-	.	Binding "THI2 conserved 103"
I	Conserved	Doniger and Fay	71169	71176	1	+	.	Binding "FKH1 conserved 104"
I	Conserved	Doniger and Fay	71169	71180	1	-	.	Binding "FKH2 conserved 105"
I	Conserved	Doniger and Fay	71262	71268	1	+	.	Binding "RIM101 conserved 106"
I	Conserved	Doniger and Fay	71263	71271	1	-	.	Binding "TYE7 conserved 107"
I	Conserved	Doniger and Fay	71264	71270	1	+	.	Binding "CBF1 conserved 108"
I	Conserved	Doniger and Fay	71264	71263	1	-	.	Binding "INO2 conserved 109"
I	Conserved	Doniger and Fay	71264	71270	1	-	.	Binding "PHO4 conserved 110"
I	Conserved	Doniger and Fay	71287	71299	1	-	.	Binding "NDD1 conserved 111"
I	Conserved	Doniger and Fay	71291	71295	1	-	.	Binding "HAP2 conserved 112"
I	Conserved	Doniger and Fay	71347	71357	1	+	.	Binding "SUM1 conserved 113"
I	Conserved	Doniger and Fay	71348	71357	1	+	.	Binding "NDT80 conserved 114"
I	Conserved	Doniger and Fay	71401	71406	1	-	.	Binding "BAS1 conserved 115"
I	Conserved	Doniger and Fay	71424	71430	1	-	.	Binding "DAL82 conserved 116"
I	Conserved	Doniger and Fay	71464	71463	1	-	.	Binding "INO2 conserved 117"
I	Conserved	Doniger and Fay	71584	71589	1	-	.	Binding "YHP1 conserved 118"
I	Conserved	Doniger and Fay	71610	71617	1	-	.	Binding "SPT23 conserved 119"
I	Conserved	Doniger and Fay	71721	71728	1	+	.	Binding "FKH1 conserved 120"
I	Conserved	Doniger and Fay	71721	71732	1	-	.	Binding "FKH2 conserved 121"
I	Semi-conserved	Doniger and Fay	71730	71741	1	+	.	Binding "RLR1 loss on Scer-Spar with turnover -55 bp away 122"
I	Conserved	Doniger and Fay	71772	71778	1	+	.	Binding "DIG1 conserved 123"
I	Conserved	Doniger and Fay	73346	73353	1	+	.	Binding "CIN5 conserved 124"
I	Conserved	Doniger and Fay	73350	73360	1	-	.	Binding "SPT2 conserved 125"
I	Conserved	Doniger and Fay	73387	73398	1	-	.	Binding "THI2 conserved 126"
I	Conserved	Doniger and Fay	73419	73424	1	+	.	Binding "MOT3 conserved 127"
I	Conserved	Doniger and Fay	73775	73785	1	-	.	Binding "SUM1 conserved 128"
I	Conserved	Doniger and Fay	73792	73801	1	-	.	Binding "STB1 conserved 129"
I	Conserved	Doniger and Fay	73792	73800	1	-	.	Binding "SWI4 conserved 130"
I	Conserved	Doniger and Fay	73792	73799	1	+	.	Binding "SWI6 conserved 131"
I	Conserved	Doniger and Fay	73794	73800	1	-	.	Binding "MBP1 conserved 132"
I	Conserved	Doniger and Fay	73822	73830	1	-	.	Binding "GLN3 conserved 133"
I	Conserved	Doniger and Fay	73824	73830	1	-	.	Binding "DAL82 conserved 134"
I	Conserved	Doniger and Fay	73825	73831	1	-	.	Binding "GAT1 conserved 135"
I	Conserved	Doniger and Fay	73825	73830	1	-	.	Binding "GZF3 conserved 136"
I	Conserved	Doniger and Fay	73826	73830	1	-	.	Binding "DAL80 conserved 137"
I	Conserved	Doniger and Fay	73961	73968	1	+	.	Binding "CIN5 conserved 138"
I	Conserved	Doniger and Fay	76257	76268	1	+	.	Binding "THI2 conserved 139"
I	Conserved	Doniger and Fay	76267	76275	1	-	.	Binding "GLN3 conserved 140"
I	Conserved	Doniger and Fay	79453	79459	1	-	.	Binding "RIM101 conserved 141"
I	Conserved	Doniger and Fay	79611	79618	1	+	.	Binding "SWI6 conserved 142"
I	Conserved	Doniger and Fay	79612	79618	1	+	.	Binding "MBP1 conserved 143"
I	Conserved	Doniger and Fay	79612	79620	1	+	.	Binding "SWI4 conserved 144"
I	Conserved	Doniger and Fay	79614	79620	1	+	.	Binding "REB1 conserved 145"
I	Conserved	Doniger and Fay	79624	79635	1	-	.	Binding "RLR1 conserved 146"
I	Conserved	Doniger and Fay	79626	79637	1	+	.	Binding "FKH2 conserved 147"
I	Conserved	Doniger and Fay	79627	79632	1	+	.	Binding "MOT3 conserved 148"
I	Conserved	Doniger and Fay	80625	80635	1	+	.	Binding "SPT2 conserved (Convergent, not counted) 149"
I	Conserved	Doniger and Fay	81962	81972	1	+	.	Binding "FHL1 conserved 150"
I	Conserved	Doniger and Fay	81963	81972	1	+	.	Binding "RAP1 conserved 151"
I	Semi-conserved	Doniger and Fay	82134	82139	1	+	.	Binding "SWI5 loss on Scer 152"
I	Conserved	Doniger and Fay	84574	84581	1	+	.	Binding "SPT23 conserved 153"
I	Conserved	Doniger and Fay	92343	92351	1	-	.	Binding "ROX1 conserved 154"
I	Conserved	Doniger and Fay	92542	92548	1	+	.	Binding "NRG1 conserved 155"
I	Conserved	Doniger and Fay	92571	92577	1	+	.	Binding "XBP1 conserved 156"
I	Conserved	Doniger and Fay	92628	92639	1	+	.	Binding "THI2 conserved 157"
I	Conserved	Doniger and Fay	92636	92642	1	+	.	Binding "TEC1 conserved 158"
I	Conserved	Doniger and Fay	92639	92650	1	+	.	Binding "FKH2 conserved 159"
I	Conserved	Doniger and Fay	92643	92650	1	-	.	Binding "FKH1 conserved 160"
I	Conserved	Doniger and Fay	92813	92821	1	+	.	Binding "ROX1 conserved 161"
I	Conserved	Doniger and Fay	99876	99884	1	-	.	Binding "TYE7 conserved 162"
I	Conserved	Doniger and Fay	99877	99883	1	+	.	Binding "CBF1 conserved 163"
I	Conserved	Doniger and Fay	99877	99883	1	-	.	Binding "PHO4 conserved 164"
I	Conserved	Doniger and Fay	100046	100054	1	+	.	Binding "MSN2 conserved 165"
I	Semi-conserved	Doniger and Fay	100078	100088	1	+	.	Binding "SPT2 loss on Scer with turnover -382 bp away 166"
I	Conserved	Doniger and Fay	100147	100151	1	+	.	Binding "HAP2 conserved 167"
I	Conserved	Doniger and Fay	100152	100151	1	-	.	Binding "INO2 conserved 168"
I	Conserved	Doniger and Fay	100152	100158	1	-	.	Binding "PHO4 conserved 169"
I	Conserved	Doniger and Fay	100181	100191	1	-	.	Binding "SPT2 conserved 170"
I	Conserved	Doniger and Fay	101236	101240	1	+	.	Binding "HAP2 conserved 171"
I	Conserved	Doniger and Fay	101270	101276	1	+	.	Binding "RGT1 conserved 172"
I	Conserved	Doniger and Fay	101313	101319	1	-	.	Binding "REB1 conserved 173"
I	Conserved	Doniger and Fay	105917	105924	1	-	.	Binding "FKH1 conserved 174"
I	Conserved	Doniger and Fay	106003	106010	1	+	.	Binding "FKH1 conserved 175"
I	Conserved	Doniger and Fay	106003	106014	1	-	.	Binding "FKH2 conserved 176"
I	Conserved	Doniger and Fay	106029	106033	1	+	.	Binding "DAL80 conserved 177"
I	Conserved	Doniger and Fay	106053	106062	1	+	.	Binding "STB1 conserved 178"
I	Conserved	Doniger and Fay	106054	106062	1	+	.	Binding "SWI4 conserved 179"
I	Conserved	Doniger and Fay	106055	106062	1	-	.	Binding "SWI6 conserved 180"
I	Conserved	Doniger and Fay	106075	106086	1	-	.	Binding "RLR1 conserved 181"
I	Conserved	Doniger and Fay	106090	106096	1	+	.	Binding "REB1 conserved 182"
I	Conserved	Doniger and Fay	106160	106164	1	-	.	Binding "DAL80 conserved 183"
I	Conserved	Doniger and Fay	108556	108561	1	+	.	Binding "SWI5 conserved 184"
I	Conserved	Doniger and Fay	108569	108579	1	-	.	Binding "SPT2 conserved 185"
I	Conserved	Doniger and Fay	108571	108577	1	+	.	Binding "STE12 conserved 186"
I	Conserved	Doniger and Fay	108572	108583	1	+	.	Binding "THI2 conserved 187"
I	Conserved	Doniger and Fay	108683	108691	1	-	.	Binding "ROX1 conserved 188"
I	Conserved	Doniger and Fay	108688	108696	1	+	.	Binding "SWI4 conserved 189"
I	Conserved	Doniger and Fay	108689	108696	1	-	.	Binding "SWI6 conserved 190"
I	Conserved	Doniger and Fay	108773	108777	1	+	.	Binding "HAP2 conserved 191"
I	Conserved	Doniger and Fay	108791	108803	1	+	.	Binding "ABF1 conserved 192"
I	Conserved	Doniger and Fay	108819	108829	1	+	.	Binding "SUM1 conserved 193"
I	Conserved	Doniger and Fay	110537	110543	1	+	.	Binding "REB1 conserved 194"
I	Conserved	Doniger and Fay	110670	110676	1	+	.	Binding "DIG1 conserved 195"
I	Conserved	Doniger and Fay	110670	110676	1	+	.	Binding "STE12 conserved 196"
I	Conserved	Doniger and Fay	110671	110683	1	-	.	Binding "HSF1 conserved 197"
I	Conserved	Doniger and Fay	110782	110788	1	-	.	Binding "STE12 conserved 198"
I	Conserved	Doniger and Fay	113372	113379	1	+	.	Binding "SOK2 conserved 199"
I	Conserved	Doniger and Fay	113504	113508	1	+	.	Binding "DAL80 conserved 200"
I	Conserved	Doniger and Fay	113504	113512	1	+	.	Binding "GLN3 conserved 201"
I	Conserved	Doniger and Fay	113507	113515	1	-	.	Binding "ROX1 conserved 202"
I	Conserved	Doniger and Fay	114689	114699	1	+	.	Binding "HAP1 conserved 203"
I	Conserved	Doniger and Fay	114705	114711	1	-	.	Binding "REB1 conserved 204"
I	Conserved	Doniger and Fay	114707	114712	1	-	.	Binding "AFT2 conserved 205"
I	Conserved	Doniger and Fay	114708	114713	1	-	.	Binding "ADR1 conserved 206"
I	Conserved	Doniger and Fay	114708	114720	1	-	.	Binding "STP1 conserved 207"
I	Conserved	Doniger and Fay	114711	114720	1	-	.	Binding "SUT1 conserved 208"
I	Conserved	Doniger and Fay	114711	114720	1	+	.	Binding "UGA3 conserved 209"
I	Conserved	Doniger and Fay	114715	114724	1	+	.	Binding "STB1 conserved 210"
I	Conserved	Doniger and Fay	114716	114730	1	-	.	Binding "MET4 conserved 211"
I	Conserved	Doniger and Fay	114716	114724	1	+	.	Binding "SWI4 conserved 212"
I	Conserved	Doniger and Fay	114717	114724	1	-	.	Binding "SWI6 conserved 213"
I	Conserved	Doniger and Fay	119711	119721	1	+	.	Binding "SUM1 conserved 214"
I	Conserved	Doniger and Fay	119712	119721	1	+	.	Binding "NDT80 conserved 215"
I	Conserved	Doniger and Fay	119749	119755	1	+	.	Binding "CBF1 conserved 216"
I	Conserved	Doniger and Fay	119750	119749	1	+	.	Binding "INO2 conserved 217"
I	Conserved	Doniger and Fay	119750	119756	1	+	.	Binding "PHO4 conserved 218"
I	Conserved	Doniger and Fay	119769	119775	1	+	.	Binding "REB1 conserved 219"
I	Conserved	Doniger and Fay	119783	119789	1	+	.	Binding "DIG1 conserved 220"
I	Conserved	Doniger and Fay	119846	119853	1	+	.	Binding "PHD1 conserved 221"
I	Conserved	Doniger and Fay	124506	124516	1	-	.	Binding "SPT2 conserved 222"
I	Conserved	Doniger and Fay	124677	124689	1	+	.	Binding "ABF1 conserved 223"
I	Conserved	Doniger and Fay	124693	124699	1	-	.	Binding "REB1 conserved 224"
I	Conserved	Doniger and Fay	124719	124727	1	+	.	Binding "SWI4 conserved 225"
I	Conserved	Doniger and Fay	124841	124845	1	-	.	Binding "DAL80 conserved 226"
I	Conserved	Doniger and Fay	124852	124857	1	+	.	Binding "YHP1 conserved 227"
I	Conserved	Doniger and Fay	126803	126812	1	+	.	Binding "SFP1 conserved (Convergent, not counted) 228"
I	Conserved	Doniger and Fay	130758	130766	1	+	.	Binding "TYE7 conserved 229"
I	Conserved	Doniger and Fay	130780	130794	1	-	.	Binding "MET4 conserved 230"
I	Conserved	Doniger and Fay	130784	130792	1	-	.	Binding "MET31 conserved 231"
I	Conserved	Doniger and Fay	130846	130857	1	+	.	Binding "THI2 conserved 232"
I	Conserved	Doniger and Fay	132093	132105	1	-	.	Binding "ABF1 conserved 233"
I	Conserved	Doniger and Fay	135724	135729	1	+	.	Binding "BAS1 conserved 234"
I	Semi-conserved	Doniger and Fay	135738	135743	1	-	.	Binding "ASH1 loss on Smik 235"
I	Conserved	Doniger and Fay	139144	139149	1	-	.	Binding "YHP1 conserved 236"
I	Conserved	Doniger and Fay	139234	139242	1	+	.	Binding "RCS1 conserved 237"
I	Conserved	Doniger and Fay	139250	139258	1	-	.	Binding "STB4 conserved 238"
I	Conserved	Doniger and Fay	139372	139382	1	+	.	Binding "SPT2 conserved 239"
I	Conserved	Doniger and Fay	139403	139413	1	+	.	Binding "SPT2 conserved 240"
I	Conserved	Doniger and Fay	142415	142424	1	-	.	Binding "CAD1 conserved 241"
I	Conserved	Doniger and Fay	142415	142423	1	-	.	Binding "YAP1 conserved 242"
I	Conserved	Doniger and Fay	142417	142423	1	+	.	Binding "ARR1 conserved 243"
I	Conserved	Doniger and Fay	142417	142423	1	+	.	Binding "YAP3 conserved 244"
I	Conserved	Doniger and Fay	142423	142433	1	-	.	Binding "SUM1 conserved 245"
I	Conserved	Doniger and Fay	142468	142474	1	-	.	Binding "RGT1 conserved 246"
I	Semi-conserved	Doniger and Fay	142748	142757	1	-	.	Binding "CAD1 loss on Smik 247"
I	Conserved	Doniger and Fay	147562	147569	1	-	.	Binding "CIN5 conserved (Convergent, not counted) 248"
I	Conserved	Doniger and Fay	151086	151093	1	+	.	Binding "FKH1 conserved 249"
I	Conserved	Doniger and Fay	154810	154815	1	+	.	Binding "SWI5 conserved 250"
I	Conserved	Doniger and Fay	154838	154844	1	-	.	Binding "REB1 conserved 251"
I	Conserved	Doniger and Fay	154838	154846	1	-	.	Binding "SWI4 conserved 252"
I	Conserved	Doniger and Fay	154838	154845	1	+	.	Binding "SWI6 conserved 253"
I	Conserved	Doniger and Fay	154840	154846	1	-	.	Binding "MBP1 conserved 254"
I	Conserved	Doniger and Fay	156720	156727	1	+	.	Binding "CIN5 conserved (Convergent, not counted) 255"
I	Conserved	Doniger and Fay	158648	158654	1	+	.	Binding "ACE2 conserved 256"
I	Conserved	Doniger and Fay	158677	158682	1	-	.	Binding "BAS1 conserved 257"
I	Conserved	Doniger and Fay	158715	158719	1	+	.	Binding "DAL80 conserved 258"
I	Conserved	Doniger and Fay	158715	158723	1	+	.	Binding "GLN3 conserved 259"
I	Conserved	Doniger and Fay	158751	158757	1	-	.	Binding "MBP1 conserved 260"
I	Conserved	Doniger and Fay	158779	158785	1	-	.	Binding "REB1 conserved 261"
I	Conserved	Doniger and Fay	158779	158787	1	-	.	Binding "SWI4 conserved 262"
I	Conserved	Doniger and Fay	158779	158786	1	+	.	Binding "SWI6 conserved 263"
I	Conserved	Doniger and Fay	158780	158786	1	+	.	Binding "MBP1 conserved 264"
I	Conserved	Doniger and Fay	168881	168887	1	+	.	Binding "TEC1 conserved 265"
I	Conserved	Doniger and Fay	169085	169091	1	+	.	Binding "STE12 conserved 266"
I	Conserved	Doniger and Fay	169123	169128	1	+	.	Binding "RTG3 conserved 267"
I	Conserved	Doniger and Fay	169125	169131	1	-	.	Binding "REB1 conserved 268"
I	Conserved	Doniger and Fay	169140	169146	1	+	.	Binding "CBF1 conserved 269"
I	Conserved	Doniger and Fay	169143	169149	1	-	.	Binding "GCN4 conserved 270"
I	Conserved	Doniger and Fay	169144	169149	1	-	.	Binding "BAS1 conserved 271"
I	Conserved	Doniger and Fay	169145	169150	1	-	.	Binding "ASH1 conserved 272"
I	Conserved	Doniger and Fay	169152	169157	1	+	.	Binding "ASH1 conserved 273"
I	Conserved	Doniger and Fay	169153	169158	1	+	.	Binding "BAS1 conserved 274"
I	Conserved	Doniger and Fay	169153	169159	1	+	.	Binding "GCN4 conserved 275"
I	Conserved	Doniger and Fay	169170	169176	1	+	.	Binding "TEC1 conserved 276"
I	Conserved	Doniger and Fay	169190	169196	1	-	.	Binding "XBP1 conserved 277"
I	Conserved	Doniger and Fay	170356	170366	1	+	.	Binding "SPT2 conserved (Convergent, not counted) 278"
I	Conserved	Doniger and Fay	171810	171817	1	+	.	Binding "FKH1 conserved 279"
I	Conserved	Doniger and Fay	171810	171821	1	-	.	Binding "FKH2 conserved 280"
I	Conserved	Doniger and Fay	171824	171836	1	-	.	Binding "MCM1 conserved 281"
I	Conserved	Doniger and Fay	171824	171836	1	-	.	Binding "NDD1 conserved 282"
I	Conserved	Doniger and Fay	171829	171835	1	-	.	Binding "ARR1 conserved 283"
I	Conserved	Doniger and Fay	171829	171835	1	-	.	Binding "YAP3 conserved 284"
II	Conserved	Doniger and Fay	13995	14002	1	+	.	Binding "CIN5 conserved 285"
II	Conserved	Doniger and Fay	13995	14006	1	+	.	Binding "FKH2 conserved 286"
II	Conserved	Doniger and Fay	13999	14006	1	-	.	Binding "FKH1 conserved 287"
II	Conserved	Doniger and Fay	14011	14019	1	+	.	Binding "ROX1 conserved 288"
II	Conserved	Doniger and Fay	18031	18040	1	-	.	Binding "STB1 conserved 289"
II	Conserved	Doniger and Fay	18031	18039	1	-	.	Binding "SWI4 conserved 290"
II	Conserved	Doniger and Fay	18031	18038	1	+	.	Binding "SWI6 conserved 291"
II	Semi-conserved	Doniger and Fay	18049	18058	1	+	.	Binding "SUT1 loss on Smik with turnover -105 bp away 292"
II	Conserved	Doniger and Fay	18055	18061	1	+	.	Binding "REB1 conserved 293"
II	Conserved	Doniger and Fay	23598	23604	1	-	.	Binding "RIM101 conserved 294"
II	Conserved	Doniger and Fay	23826	23835	1	+	.	Binding "CAD1 conserved 295"
II	Conserved	Doniger and Fay	23827	23835	1	-	.	Binding "GLN3 conserved 296"
II	Conserved	Doniger and Fay	23872	23878	1	-	.	Binding "GCN4 conserved 297"
II	Conserved	Doniger and Fay	23873	23878	1	-	.	Binding "BAS1 conserved 298"
II	Conserved	Doniger and Fay	23882	23889	1	+	.	Binding "PDR3 conserved 299"
II	Conserved	Doniger and Fay	23883	23895	1	-	.	Binding "CSRE conserved 300"
II	Conserved	Doniger and Fay	23903	23908	1	-	.	Binding "RTG3 conserved 301"
II	Conserved	Doniger and Fay	23904	23910	1	-	.	Binding "REB1 conserved 302"
II	Conserved	Doniger and Fay	23940	23944	1	-	.	Binding "HAP2 conserved 303"
II	Conserved	Doniger and Fay	24809	24815	1	+	.	Binding "DIG1 conserved (Convergent, not counted) 304"
II	Conserved	Doniger and Fay	24878	24877	1	+	.	Binding "INO2 conserved (Convergent, not counted) 305"
II	Conserved	Doniger and Fay	24892	24901	1	+	.	Binding "RLM1 conserved (Convergent, not counted) 306"
II	Conserved	Doniger and Fay	38705	38712	1	+	.	Binding "SPT23 conserved 307"
II	Conserved	Doniger and Fay	38734	38745	1	+	.	Binding "FKH2 conserved 308"
II	Conserved	Doniger and Fay	38738	38747	1	+	.	Binding "RLM1 conserved 309"
II	Conserved	Doniger and Fay	38876	38883	1	-	.	Binding "FKH1 conserved 310"
II	Conserved	Doniger and Fay	38928	38938	1	+	.	Binding "HAP1 conserved 311"
II	Conserved	Doniger and Fay	39012	39017	1	+	.	Binding "ASH1 conserved 312"
II	Conserved	Doniger and Fay	39013	39018	1	+	.	Binding "BAS1 conserved 313"
II	Conserved	Doniger and Fay	39013	39019	1	+	.	Binding "GCN4 conserved 314"
II	Conserved	Doniger and Fay	39053	39062	1	-	.	Binding "NDT80 conserved 315"
II	Conserved	Doniger and Fay	39053	39063	1	-	.	Binding "SUM1 conserved 316"
II	Conserved	Doniger and Fay	40642	40654	1	+	.	Binding "ABF1 conserved 317"
II	Conserved	Doniger and Fay	40680	40687	1	+	.	Binding "FKH1 conserved 318"
II	Conserved	Doniger and Fay	40680	40691	1	-	.	Binding "FKH2 conserved 319"
II	Conserved	Doniger and Fay	43170	43179	1	-	.	Binding "STB5 conserved 320"
II	Conserved	Doniger and Fay	43171	43175	1	-	.	Binding "DAL80 conserved 321"
II	Conserved	Doniger and Fay	43174	43186	1	+	.	Binding "NDD1 conserved 322"
II	Conserved	Doniger and Fay	43213	43218	1	+	.	Binding "MOT3 conserved 323"
II	Semi-conserved	Doniger and Fay	44175	44185	1	+	.	Binding "PDR1 loss on Smik(Convergent, not counted) 324"
II	Conserved	Doniger and Fay	44188	44194	1	+	.	Binding "PHO4 conserved (Convergent, not counted) 325"
II	Conserved	Doniger and Fay	71419	71427	1	-	.	Binding "GLN3 conserved 326"
II	Conserved	Doniger and Fay	71435	71441	1	-	.	Binding "NRG1 conserved 327"
II	Conserved	Doniger and Fay	71436	71441	1	+	.	Binding "AFT2 conserved 328"
II	Conserved	Doniger and Fay	71440	71446	1	-	.	Binding "PHO4 conserved 329"
II	Conserved	Doniger and Fay	71713	71718	1	-	.	Binding "MOT3 conserved 330"
II	Conserved	Doniger and Fay	71720	71726	1	-	.	Binding "TEC1 conserved 331"
II	Conserved	Doniger and Fay	71777	71786	1	+	.	Binding "RLM1 conserved 332"
II	Conserved	Doniger and Fay	71807	71816	1	+	.	Binding "CAD1 conserved 333"
II	Conserved	Doniger and Fay	71808	71816	1	+	.	Binding "YAP1 conserved 334"
II	Conserved	Doniger and Fay	71817	71828	1	+	.	Binding "RLR1 conserved 335"
II	Conserved	Doniger and Fay	71822	71833	1	+	.	Binding "RLR1 conserved 336"
II	Semi-conserved	Doniger and Fay	80109	80120	1	+	.	Binding "RLR1 loss on Scer-Spar with turnover -22 bp away (Convergent, not counted) 337"
II	Conserved	Doniger and Fay	80148	80159	1	+	.	Binding "FKH2 conserved (Convergent, not counted) 338"
II	Conserved	Doniger and Fay	80245	80251	1	-	.	Binding "REB1 conserved (Convergent, not counted) 339"
II	Semi-conserved	Doniger and Fay	80278	80289	1	+	.	Binding "FKH2 loss on Smik with turnover -333 bp away (Convergent, not counted) 340"
II	Conserved	Doniger and Fay	80287	80293	1	-	.	Binding "TEC1 conserved (Convergent, not counted) 341"
II	Conserved	Doniger and Fay	80781	80789	1	-	.	Binding "GLN3 conserved 342"
II	Conserved	Doniger and Fay	80783	80789	1	-	.	Binding "DAL82 conserved 343"
II	Conserved	Doniger and Fay	80784	80790	1	-	.	Binding "GAT1 conserved 344"
II	Conserved	Doniger and Fay	80784	80789	1	-	.	Binding "GZF3 conserved 345"
II	Conserved	Doniger and Fay	80785	80789	1	-	.	Binding "DAL80 conserved 346"
II	Conserved	Doniger and Fay	80851	80859	1	+	.	Binding "RPN4 conserved 347"
II	Conserved	Doniger and Fay	80852	80861	1	+	.	Binding "UME6 conserved 348"
II	Conserved	Doniger and Fay	80854	80861	1	+	.	Binding "PHD1 conserved 349"
II	Conserved	Doniger and Fay	80854	80862	1	+	.	Binding "SKN7 conserved 350"
II	Conserved	Doniger and Fay	80854	80863	1	+	.	Binding "SUT1 conserved 351"
II	Semi-conserved	Doniger and Fay	80858	80868	1	+	.	Binding "PDR1 loss on Smik with turnover -8 bp away 352"
II	Conserved	Doniger and Fay	80879	80885	1	+	.	Binding "REB1 conserved 353"
II	Conserved	Doniger and Fay	84354	84365	1	+	.	Binding "SIG1 conserved 354"
II	Conserved	Doniger and Fay	84355	84361	1	-	.	Binding "GCN4 conserved 355"
II	Conserved	Doniger and Fay	84356	84361	1	-	.	Binding "BAS1 conserved 356"
II	Conserved	Doniger and Fay	84382	84387	1	+	.	Binding "AFT2 conserved 357"
II	Conserved	Doniger and Fay	84432	84438	1	-	.	Binding "REB1 conserved 358"
II	Conserved	Doniger and Fay	86576	86582	1	-	.	Binding "TEC1 conserved 359"
II	Conserved	Doniger and Fay	86597	86602	1	-	.	Binding "AFT2 conserved 360"
II	Conserved	Doniger and Fay	86623	86635	1	+	.	Binding "HSF1 conserved 361"
II	Conserved	Doniger and Fay	86657	86662	1	-	.	Binding "AFT2 conserved 362"
II	Conserved	Doniger and Fay	86658	86667	1	-	.	Binding "RAP1 conserved 363"
II	Conserved	Doniger and Fay	86698	86708	1	-	.	Binding "SNT2 conserved 364"
II	Conserved	Doniger and Fay	87894	87906	1	-	.	Binding "ABF1 conserved 365"
II	Conserved	Doniger and Fay	88088	88096	1	+	.	Binding "MSN2 conserved 366"
II	Conserved	Doniger and Fay	88089	88094	1	+	.	Binding "AFT2 conserved 367"
II	Conserved	Doniger and Fay	88208	88218	1	-	.	Binding "SPT2 conserved 368"
II	Conserved	Doniger and Fay	88247	88251	1	+	.	Binding "DAL80 conserved 369"
II	Conserved	Doniger and Fay	88270	88275	1	+	.	Binding "ASH1 conserved 370"
II	Conserved	Doniger and Fay	88423	88427	1	+	.	Binding "DAL80 conserved 371"
II	Conserved	Doniger and Fay	88458	88464	1	+	.	Binding "GAT1 conserved 372"
II	Conserved	Doniger and Fay	88459	88465	1	+	.	Binding "DAL82 conserved 373"
II	Conserved	Doniger and Fay	89127	89138	1	+	.	Binding "THI2 conserved 374"
II	Conserved	Doniger and Fay	89158	89164	1	-	.	Binding "ARR1 conserved 375"
II	Conserved	Doniger and Fay	89158	89164	1	-	.	Binding "YAP3 conserved 376"
II	Conserved	Doniger and Fay	89196	89204	1	-	.	Binding "GLN3 conserved 377"
II	Conserved	Doniger and Fay	89198	89204	1	-	.	Binding "DAL82 conserved 378"
II	Conserved	Doniger and Fay	89199	89205	1	-	.	Binding "GAT1 conserved 379"
II	Conserved	Doniger and Fay	89199	89204	1	-	.	Binding "GZF3 conserved 380"
II	Conserved	Doniger and Fay	89443	89452	1	+	.	Binding "RAP1 conserved 381"
II	Conserved	Doniger and Fay	90540	90549	1	+	.	Binding "NDT80 conserved 382"
II	Conserved	Doniger and Fay	90584	90588	1	-	.	Binding "DAL80 conserved 383"
II	Conserved	Doniger and Fay	90605	90616	1	+	.	Binding "YOX1 conserved 384"
II	Conserved	Doniger and Fay	95988	95993	1	-	.	Binding "ASH1 conserved 385"
II	Conserved	Doniger and Fay	96137	96142	1	-	.	Binding "YHP1 conserved 386"
II	Conserved	Doniger and Fay	96157	96163	1	-	.	Binding "GAT1 conserved 387"
II	Conserved	Doniger and Fay	96157	96162	1	-	.	Binding "GZF3 conserved 388"
II	Conserved	Doniger and Fay	96158	96162	1	-	.	Binding "DAL80 conserved 389"
II	Conserved	Doniger and Fay	96213	96222	1	+	.	Binding "CAD1 conserved 390"
II	Conserved	Doniger and Fay	96214	96222	1	+	.	Binding "YAP1 conserved 391"
II	Conserved	Doniger and Fay	96218	96223	1	-	.	Binding "SWI5 conserved 392"
II	Conserved	Doniger and Fay	96261	96265	1	+	.	Binding "DAL80 conserved 393"
II	Conserved	Doniger and Fay	96261	96269	1	+	.	Binding "GLN3 conserved 394"
II	Conserved	Doniger and Fay	96261	96266	1	+	.	Binding "GZF3 conserved 395"
II	Semi-conserved	Doniger and Fay	96517	96528	1	-	.	Binding "YOX1 loss on Smik 396"
II	Semi-conserved	Doniger and Fay	96522	96533	1	-	.	Binding "SIG1 loss on Smik 397"
II	Conserved	Doniger and Fay	100259	100263	1	+	.	Binding "HAP2 conserved 398"
II	Conserved	Doniger and Fay	100275	100287	1	-	.	Binding "ABF1 conserved 399"
II	Semi-conserved	Doniger and Fay	101267	101275	1	-	.	Binding "MSN2 loss on Smik with turnover 57 bp away 400"
II	Conserved	Doniger and Fay	101282	101289	1	+	.	Binding "CIN5 conserved 401"
II	Conserved	Doniger and Fay	101293	101302	1	-	.	Binding "STB5 conserved 402"
II	Conserved	Doniger and Fay	101302	101318	1	-	.	Binding "GAL4 conserved 403"
II	Conserved	Doniger and Fay	101302	101318	1	+	.	Binding "GAL80 conserved 404"
II	Conserved	Doniger and Fay	101317	101323	1	+	.	Binding "REB1 conserved 405"
II	Conserved	Doniger and Fay	101354	101363	1	+	.	Binding "UME6 conserved 406"
II	Conserved	Doniger and Fay	101370	101382	1	+	.	Binding "ABF1 conserved 407"
II	Semi-conserved	Doniger and Fay	101397	101406	1	+	.	Binding "UME6 loss on Smik 408"
II	Conserved	Doniger and Fay	101410	101422	1	-	.	Binding "ABF1 conserved 409"
II	Semi-conserved	Doniger and Fay	101755	101763	1	-	.	Binding "SWI4 loss on Scer-Spar 410"
II	Semi-conserved	Doniger and Fay	101755	101762	1	+	.	Binding "SWI6 loss on Scer-Spar 411"
II	Conserved	Doniger and Fay	101815	101826	1	+	.	Binding "FKH2 conserved 412"
II	Conserved	Doniger and Fay	101823	101834	1	+	.	Binding "FKH2 conserved 413"
II	Conserved	Doniger and Fay	101827	101834	1	-	.	Binding "FKH1 conserved 414"
II	Conserved	Doniger and Fay	107551	107557	1	-	.	Binding "NRG1 conserved 415"
II	Conserved	Doniger and Fay	107577	107586	1	+	.	Binding "RLM1 conserved 416"
II	Conserved	Doniger and Fay	107595	107601	1	+	.	Binding "MBP1 conserved 417"
II	Conserved	Doniger and Fay	107604	107610	1	+	.	Binding "DIG1 conserved 418"
II	Conserved	Doniger and Fay	107604	107610	1	+	.	Binding "STE12 conserved 419"
II	Conserved	Doniger and Fay	107800	107810	1	+	.	Binding "FHL1 conserved 420"
II	Conserved	Doniger and Fay	107800	107809	1	-	.	Binding "SFP1 conserved 421"
II	Conserved	Doniger and Fay	107801	107810	1	+	.	Binding "RAP1 conserved 422"
II	Conserved	Doniger and Fay	107806	107811	1	+	.	Binding "AFT2 conserved 423"
II	Conserved	Doniger and Fay	107806	107814	1	+	.	Binding "RCS1 conserved 424"
II	Conserved	Doniger and Fay	110932	110938	1	-	.	Binding "REB1 conserved 425"
II	Conserved	Doniger and Fay	110952	110956	1	-	.	Binding "HAP2 conserved 426"
II	Conserved	Doniger and Fay	110955	110963	1	-	.	Binding "RPN4 conserved 427"
II	Semi-conserved	Doniger and Fay	110986	110994	1	+	.	Binding "MSN2 loss on Smik with turnover -64 bp away 428"
II	Conserved	Doniger and Fay	113544	113556	1	-	.	Binding "ABF1 conserved 429"
II	Conserved	Doniger and Fay	115504	115513	1	+	.	Binding "RLM1 conserved (Convergent, not counted) 430"
II	Conserved	Doniger and Fay	115553	115559	1	-	.	Binding "MAC1 conserved (Convergent, not counted) 431"
II	Conserved	Doniger and Fay	117088	117094	1	-	.	Binding "ARR1 conserved 432"
II	Conserved	Doniger and Fay	117088	117094	1	-	.	Binding "YAP3 conserved 433"
II	Conserved	Doniger and Fay	117380	117386	1	-	.	Binding "GCN4 conserved 434"
II	Conserved	Doniger and Fay	117387	117398	1	+	.	Binding "RLR1 conserved 435"
II	Conserved	Doniger and Fay	117423	117431	1	+	.	Binding "YAP1 conserved 436"
II	Conserved	Doniger and Fay	121967	121978	1	+	.	Binding "RLR1 conserved 437"
II	Conserved	Doniger and Fay	122195	122206	1	+	.	Binding "FKH2 conserved 438"
II	Conserved	Doniger and Fay	122199	122206	1	-	.	Binding "FKH1 conserved 439"
II	Conserved	Doniger and Fay	122228	122234	1	-	.	Binding "REB1 conserved 440"
II	Conserved	Doniger and Fay	122449	122453	1	+	.	Binding "DAL80 conserved 441"
II	Conserved	Doniger and Fay	122504	122508	1	-	.	Binding "DAL80 conserved 442"
II	Conserved	Doniger and Fay	122547	122558	1	+	.	Binding "RLR1 conserved 443"
II	Conserved	Doniger and Fay	122566	122573	1	-	.	Binding "SPT23 conserved 444"
II	Conserved	Doniger and Fay	124930	124942	1	-	.	Binding "ABF1 conserved 445"
II	Conserved	Doniger and Fay	124954	124960	1	-	.	Binding "REB1 conserved 446"
II	Conserved	Doniger and Fay	125031	125037	1	+	.	Binding "DAL82 conserved 447"
II	Conserved	Doniger and Fay	125031	125036	1	+	.	Binding "GZF3 conserved 448"
II	Conserved	Doniger and Fay	125218	125230	1	+	.	Binding "NDD1 conserved 449"
II	Conserved	Doniger and Fay	125221	125230	1	+	.	Binding "UGA3 conserved 450"
II	Conserved	Doniger and Fay	125236	125241	1	+	.	Binding "YHP1 conserved 451"
II	Semi-conserved	Doniger and Fay	125246	125251	1	-	.	Binding "SWI5 loss on Scer with turnover 300 bp away 452"
II	Conserved	Doniger and Fay	125253	125258	1	-	.	Binding "AFT2 conserved 453"
II	Conserved	Doniger and Fay	125268	125272	1	+	.	Binding "DAL80 conserved 454"
II	Conserved	Doniger and Fay	125282	125291	1	-	.	Binding "CAD1 conserved 455"
II	Conserved	Doniger and Fay	125358	125364	1	-	.	Binding "DIG1 conserved 456"
II	Conserved	Doniger and Fay	125358	125364	1	-	.	Binding "STE12 conserved 457"
II	Conserved	Doniger and Fay	125443	125453	1	+	.	Binding "FHL1 conserved 458"
II	Conserved	Doniger and Fay	125443	125452	1	-	.	Binding "SFP1 conserved 459"
II	Conserved	Doniger and Fay	125444	125453	1	+	.	Binding "RAP1 conserved 460"
II	Conserved	Doniger and Fay	125467	125473	1	-	.	Binding "DAL82 conserved 461"
II	Conserved	Doniger and Fay	125469	125475	1	-	.	Binding "RGT1 conserved 462"
II	Conserved	Doniger and Fay	125498	125504	1	+	.	Binding "MBP1 conserved 463"
II	Conserved	Doniger and Fay	125538	125544	1	-	.	Binding "TEC1 conserved 464"
II	Conserved	Doniger and Fay	125589	125596	1	+	.	Binding "CIN5 conserved 465"
II	Conserved	Doniger and Fay	125654	125658	1	+	.	Binding "DAL80 conserved 466"
II	Conserved	Doniger and Fay	127359	127367	1	-	.	Binding "SWI4 conserved (Convergent, not counted) 467"
II	Conserved	Doniger and Fay	127703	127713	1	-	.	Binding "SPT2 conserved (Convergent, not counted) 468"
II	Conserved	Doniger and Fay	127757	127761	1	+	.	Binding "DAL80 conserved (Convergent, not counted) 469"
II	Conserved	Doniger and Fay	132290	132295	1	-	.	Binding "ADR1 conserved 470"
II	Conserved	Doniger and Fay	132305	132311	1	+	.	Binding "REB1 conserved 471"
II	Conserved	Doniger and Fay	132326	132333	1	-	.	Binding "SPT23 conserved 472"
II	Semi-conserved	Doniger and Fay	135783	135790	1	-	.	Binding "SPT23 loss on Spar with turnover 265 bp away 473"
II	Conserved	Doniger and Fay	135998	136007	1	+	.	Binding "RAP1 conserved 474"
II	Conserved	Doniger and Fay	136035	136041	1	+	.	Binding "RIM101 conserved 475"
II	Conserved	Doniger and Fay	136097	136105	1	-	.	Binding "YAP1 conserved 476"
II	Conserved	Doniger and Fay	136098	136103	1	+	.	Binding "ASH1 conserved 477"
II	Conserved	Doniger and Fay	136099	136104	1	+	.	Binding "BAS1 conserved 478"
II	Conserved	Doniger and Fay	136099	136105	1	+	.	Binding "GCN4 conserved 479"
II	Conserved	Doniger and Fay	136156	136164	1	+	.	Binding "STB4 conserved 480"
II	Conserved	Doniger and Fay	136177	136182	1	-	.	Binding "ADR1 conserved 481"
II	Conserved	Doniger and Fay	136201	136205	1	-	.	Binding "HAP2 conserved 482"
II	Conserved	Doniger and Fay	136223	136229	1	+	.	Binding "NRG1 conserved 483"
II	Conserved	Doniger and Fay	136275	136283	1	+	.	Binding "ROX1 conserved 484"
II	Conserved	Doniger and Fay	136280	136290	1	-	.	Binding "PDR1 conserved 485"
II	Conserved	Doniger and Fay	136280	136286	1	-	.	Binding "STE12 conserved 486"
II	Conserved	Doniger and Fay	136313	136319	1	-	.	Binding "REB1 conserved 487"
II	Conserved	Doniger and Fay	136431	136438	1	+	.	Binding "PDR3 conserved 488"
II	Conserved	Doniger and Fay	145860	145871	1	-	.	Binding "THI2 conserved 489"
II	Conserved	Doniger and Fay	145874	145880	1	-	.	Binding "XBP1 conserved 490"
II	Conserved	Doniger and Fay	146014	146026	1	+	.	Binding "ABF1 conserved 491"
II	Conserved	Doniger and Fay	146904	146914	1	+	.	Binding "SPT2 conserved 492"
II	Conserved	Doniger and Fay	146912	146922	1	+	.	Binding "SPT2 conserved 493"
II	Semi-conserved	Doniger and Fay	150317	150328	1	+	.	Binding "RLR1 loss on Scer with turnover -10 bp away (Convergent, not counted) 494"
II	Conserved	Doniger and Fay	153806	153812	1	+	.	Binding "MBP1 conserved 495"
II	Conserved	Doniger and Fay	153807	153814	1	-	.	Binding "SWI6 conserved 496"
II	Conserved	Doniger and Fay	158447	158452	1	-	.	Binding "MOT3 conserved 497"
II	Conserved	Doniger and Fay	158482	158493	1	+	.	Binding "FKH2 conserved 498"
II	Conserved	Doniger and Fay	158486	158493	1	-	.	Binding "FKH1 conserved 499"
II	Conserved	Doniger and Fay	158519	158530	1	+	.	Binding "FKH2 conserved 500"
II	Conserved	Doniger and Fay	158523	158530	1	-	.	Binding "FKH1 conserved 501"
II	Conserved	Doniger and Fay	158566	158575	1	+	.	Binding "SUT1 conserved 502"
II	Conserved	Doniger and Fay	158566	158575	1	+	.	Binding "UGA3 conserved 503"
II	Conserved	Doniger and Fay	158573	158578	1	+	.	Binding "ADR1 conserved 504"
II	Conserved	Doniger and Fay	158574	158580	1	+	.	Binding "REB1 conserved 505"
II	Conserved	Doniger and Fay	158601	158612	1	-	.	Binding "SIG1 conserved 506"
II	Conserved	Doniger and Fay	159739	159744	1	+	.	Binding "BAS1 conserved 507"
II	Conserved	Doniger and Fay	159739	159745	1	+	.	Binding "GCN4 conserved 508"
II	Conserved	Doniger and Fay	159759	159764	1	-	.	Binding "SWI5 conserved 509"
II	Conserved	Doniger and Fay	159819	159827	1	-	.	Binding "YAP1 conserved 510"
II	Conserved	Doniger and Fay	159827	159836	1	-	.	Binding "NDT80 conserved 511"
II	Conserved	Doniger and Fay	159827	159837	1	-	.	Binding "SUM1 conserved 512"
II	Conserved	Doniger and Fay	159830	159839	1	-	.	Binding "CAD1 conserved 513"
II	Conserved	Doniger and Fay	159830	159838	1	-	.	Binding "YAP1 conserved 514"
II	Conserved	Doniger and Fay	160143	160155	1	-	.	Binding "MCM1 conserved 515"
II	Conserved	Doniger and Fay	160149	160155	1	+	.	Binding "REB1 conserved 516"
II	Conserved	Doniger and Fay	161390	161401	1	-	.	Binding "SIG1 conserved 517"
II	Conserved	Doniger and Fay	161564	161573	1	-	.	Binding "STB1 conserved 518"
II	Conserved	Doniger and Fay	161564	161572	1	-	.	Binding "SWI4 conserved 519"
II	Conserved	Doniger and Fay	161564	161571	1	+	.	Binding "SWI6 conserved 520"
II	Semi-conserved	Doniger and Fay	161597	161608	1	-	.	Binding "RLR1 loss on Smik with turnover 15 bp away 521"
II	Conserved	Doniger and Fay	161643	161650	1	-	.	Binding "FKH1 conserved 522"
II	Conserved	Doniger and Fay	162787	162800	1	+	.	Binding "SMP1 conserved (Convergent, not counted) 523"
II	Conserved	Doniger and Fay	162822	162833	1	+	.	Binding "RLR1 conserved (Convergent, not counted) 524"
II	Conserved	Doniger and Fay	162827	162838	1	+	.	Binding "RLR1 conserved (Convergent, not counted) 525"
II	Conserved	Doniger and Fay	162931	162935	1	+	.	Binding "DAL80 conserved (Convergent, not counted) 526"
II	Conserved	Doniger and Fay	162956	162966	1	+	.	Binding "SUM1 conserved (Convergent, not counted) 527"
II	Conserved	Doniger and Fay	162959	162964	1	+	.	Binding "BAS1 conserved (Convergent, not counted) 528"
II	Conserved	Doniger and Fay	162969	162977	1	+	.	Binding "SWI4 conserved (Convergent, not counted) 529"
II	Conserved	Doniger and Fay	163012	163019	1	+	.	Binding "SPT23 conserved (Convergent, not counted) 530"
II	Conserved	Doniger and Fay	164173	164180	1	+	.	Binding "SPT23 conserved 531"
II	Conserved	Doniger and Fay	164246	164256	1	-	.	Binding "HAP1 conserved 532"
II	Conserved	Doniger and Fay	164248	164252	1	+	.	Binding "DAL80 conserved 533"
II	Conserved	Doniger and Fay	164254	164264	1	-	.	Binding "PHO2 conserved 534"
II	Conserved	Doniger and Fay	164275	164280	1	+	.	Binding "AFT2 conserved 535"
II	Conserved	Doniger and Fay	164286	164290	1	-	.	Binding "HAP2 conserved 536"
II	Conserved	Doniger and Fay	164289	164297	1	-	.	Binding "SKN7 conserved 537"
II	Conserved	Doniger and Fay	164304	164308	1	+	.	Binding "HAP2 conserved 538"
II	Conserved	Doniger and Fay	164318	164328	1	+	.	Binding "HAP1 conserved 539"
II	Conserved	Doniger and Fay	164360	164372	1	-	.	Binding "ABF1 conserved 540"
II	Conserved	Doniger and Fay	172358	172370	1	-	.	Binding "ABF1 conserved 541"
II	Conserved	Doniger and Fay	177702	177708	1	+	.	Binding "ARR1 conserved 542"
II	Conserved	Doniger and Fay	177702	177708	1	+	.	Binding "YAP3 conserved 543"
II	Conserved	Doniger and Fay	181353	181352	1	+	.	Binding "INO2 conserved 544"
II	Conserved	Doniger and Fay	181355	181363	1	-	.	Binding "RCS1 conserved 545"
II	Conserved	Doniger and Fay	181469	181477	1	-	.	Binding "RPN4 conserved 546"
II	Conserved	Doniger and Fay	181481	181489	1	-	.	Binding "RCS1 conserved 547"
II	Conserved	Doniger and Fay	181484	181489	1	-	.	Binding "AFT2 conserved 548"
II	Conserved	Doniger and Fay	181498	181503	1	-	.	Binding "AFT2 conserved 549"
II	Conserved	Doniger and Fay	181499	181509	1	-	.	Binding "FHL1 conserved 550"
II	Conserved	Doniger and Fay	181499	181508	1	-	.	Binding "RAP1 conserved 551"
II	Conserved	Doniger and Fay	181500	181509	1	+	.	Binding "SFP1 conserved 552"
II	Conserved	Doniger and Fay	181544	181548	1	-	.	Binding "DAL80 conserved 553"
II	Conserved	Doniger and Fay	201754	201759	1	-	.	Binding "SWI5 conserved 554"
II	Conserved	Doniger and Fay	201874	201880	1	+	.	Binding "REB1 conserved 555"
II	Conserved	Doniger and Fay	205899	205903	1	-	.	Binding "HAP2 conserved (Convergent, not counted) 556"
II	Conserved	Doniger and Fay	205926	205937	1	-	.	Binding "FKH2 conserved (Convergent, not counted) 557"
II	Conserved	Doniger and Fay	207053	207062	1	+	.	Binding "STB1 conserved 558"
II	Conserved	Doniger and Fay	207054	207062	1	+	.	Binding "SWI4 conserved 559"
II	Conserved	Doniger and Fay	207055	207062	1	-	.	Binding "SWI6 conserved 560"
II	Conserved	Doniger and Fay	207097	207108	1	+	.	Binding "FKH2 conserved 561"
II	Conserved	Doniger and Fay	207101	207108	1	-	.	Binding "FKH1 conserved 562"
II	Conserved	Doniger and Fay	209272	209281	1	-	.	Binding "CAD1 conserved 563"
II	Conserved	Doniger and Fay	209274	209282	1	+	.	Binding "YAP1 conserved 564"
II	Conserved	Doniger and Fay	209506	209513	1	+	.	Binding "SPT23 conserved 565"
II	Conserved	Doniger and Fay	209576	209580	1	-	.	Binding "HAP2 conserved 566"
II	Conserved	Doniger and Fay	209649	209655	1	+	.	Binding "GAT1 conserved 567"
II	Conserved	Doniger and Fay	209650	209654	1	+	.	Binding "DAL80 conserved 568"
II	Conserved	Doniger and Fay	209650	209655	1	+	.	Binding "GZF3 conserved 569"
II	Conserved	Doniger and Fay	212495	212501	1	-	.	Binding "ARR1 conserved (Convergent, not counted) 570"
II	Conserved	Doniger and Fay	212495	212501	1	-	.	Binding "YAP3 conserved (Convergent, not counted) 571"
II	Conserved	Doniger and Fay	216483	216494	1	-	.	Binding "SIG1 conserved 572"
II	Conserved	Doniger and Fay	216522	216530	1	-	.	Binding "MSN2 conserved 573"
II	Conserved	Doniger and Fay	216526	216538	1	-	.	Binding "MCM1 conserved 574"
II	Conserved	Doniger and Fay	216526	216538	1	-	.	Binding "NDD1 conserved 575"
II	Conserved	Doniger and Fay	216531	216537	1	-	.	Binding "ARR1 conserved 576"
II	Conserved	Doniger and Fay	216531	216537	1	-	.	Binding "YAP3 conserved 577"
II	Conserved	Doniger and Fay	216545	216557	1	+	.	Binding "ABF1 conserved 578"
II	Conserved	Doniger and Fay	217212	217219	1	-	.	Binding "SPT23 conserved 579"
II	Conserved	Doniger and Fay	217282	217289	1	+	.	Binding "PDR3 conserved 580"
II	Conserved	Doniger and Fay	217283	217293	1	+	.	Binding "PDR1 conserved 581"
II	Conserved	Doniger and Fay	217286	217292	1	+	.	Binding "RGT1 conserved 582"
II	Conserved	Doniger and Fay	217318	217324	1	+	.	Binding "TEC1 conserved 583"
II	Conserved	Doniger and Fay	242628	242640	1	-	.	Binding "MCM1 conserved 584"
II	Conserved	Doniger and Fay	242670	242676	1	-	.	Binding "RIM101 conserved 585"
II	Conserved	Doniger and Fay	242673	242683	1	+	.	Binding "HAP1 conserved 586"
II	Conserved	Doniger and Fay	242698	242704	1	+	.	Binding "REB1 conserved 587"
II	Conserved	Doniger and Fay	244310	244321	1	+	.	Binding "FKH2 conserved (Convergent, not counted) 588"
II	Conserved	Doniger and Fay	245791	245802	1	+	.	Binding "RLR1 conserved 589"
II	Semi-conserved	Doniger and Fay	245802	245812	1	+	.	Binding "SPT2 loss on Smik 590"
II	Conserved	Doniger and Fay	267460	267468	1	-	.	Binding "STB4 conserved 591"
II	Conserved	Doniger and Fay	267515	267520	1	-	.	Binding "SKO1 conserved 592"
II	Conserved	Doniger and Fay	267664	267673	1	+	.	Binding "STB1 conserved 593"
II	Conserved	Doniger and Fay	267669	267673	1	+	.	Binding "HAP2 conserved 594"
II	Conserved	Doniger and Fay	269715	269724	1	+	.	Binding "STB1 conserved 595"
II	Conserved	Doniger and Fay	269717	269723	1	-	.	Binding "MBP1 conserved 596"
II	Conserved	Doniger and Fay	269717	269724	1	-	.	Binding "SWI6 conserved 597"
II	Conserved	Doniger and Fay	270071	270088	1	-	.	Binding "PUT3 conserved 598"
II	Conserved	Doniger and Fay	270080	270085	1	-	.	Binding "SWI5 conserved 599"
II	Conserved	Doniger and Fay	270106	270111	1	-	.	Binding "SWI5 conserved 600"
II	Conserved	Doniger and Fay	270120	270127	1	+	.	Binding "RDS1 conserved 601"
II	Conserved	Doniger and Fay	270120	270129	1	+	.	Binding "SUT1 conserved 602"
II	Conserved	Doniger and Fay	270899	270905	1	+	.	Binding "TEC1 conserved (Convergent, not counted) 603"
II	Conserved	Doniger and Fay	273883	273889	1	+	.	Binding "REB1 conserved 604"
II	Conserved	Doniger and Fay	274099	274108	1	-	.	Binding "NDT80 conserved 605"
II	Conserved	Doniger and Fay	274099	274109	1	-	.	Binding "SUM1 conserved 606"
II	Conserved	Doniger and Fay	275696	275702	1	+	.	Binding "RGT1 conserved 607"
II	Conserved	Doniger and Fay	275730	275735	1	-	.	Binding "AFT2 conserved 608"
II	Conserved	Doniger and Fay	275730	275736	1	+	.	Binding "NRG1 conserved 609"
II	Conserved	Doniger and Fay	275800	275806	1	-	.	Binding "RGT1 conserved 610"
II	Conserved	Doniger and Fay	278358	278365	1	-	.	Binding "SPT23 conserved 611"
II	Conserved	Doniger and Fay	278568	278574	1	+	.	Binding "RGT1 conserved 612"
II	Conserved	Doniger and Fay	278576	278585	1	+	.	Binding "UME6 conserved 613"
II	Conserved	Doniger and Fay	278579	278591	1	-	.	Binding "CSRE conserved 614"
II	Conserved	Doniger and Fay	278587	278603	1	+	.	Binding "GAL4 conserved 615"
II	Conserved	Doniger and Fay	278587	278603	1	+	.	Binding "GAL80 conserved 616"
II	Conserved	Doniger and Fay	278605	278621	1	+	.	Binding "GAL4 conserved 617"
II	Conserved	Doniger and Fay	278605	278621	1	+	.	Binding "GAL80 conserved 618"
II	Conserved	Doniger and Fay	278605	278611	1	+	.	Binding "RGT1 conserved 619"
II	Conserved	Doniger and Fay	278616	278621	1	-	.	Binding "ADR1 conserved 620"
II	Conserved	Doniger and Fay	278669	278685	1	-	.	Binding "GAL4 conserved 621"
II	Conserved	Doniger and Fay	278669	278685	1	+	.	Binding "GAL80 conserved 622"
II	Conserved	Doniger and Fay	281055	281067	1	-	.	Binding "MCM1 conserved 623"
II	Conserved	Doniger and Fay	281055	281067	1	-	.	Binding "NDD1 conserved 624"
II	Semi-conserved	Doniger and Fay	281262	281270	1	+	.	Binding "YAP1 loss on Smik with turnover 63 bp away 625"
II	Conserved	Doniger and Fay	283379	283385	1	+	.	Binding "DIG1 conserved 626"
II	Conserved	Doniger and Fay	283379	283385	1	+	.	Binding "STE12 conserved 627"
II	Conserved	Doniger and Fay	288002	288014	1	+	.	Binding "MCM1 conserved 628"
II	Conserved	Doniger and Fay	288095	288101	1	+	.	Binding "DIG1 conserved 629"
II	Conserved	Doniger and Fay	288095	288101	1	+	.	Binding "STE12 conserved 630"
II	Conserved	Doniger and Fay	288117	288124	1	-	.	Binding "SPT23 conserved 631"
II	Conserved	Doniger and Fay	288124	288133	1	+	.	Binding "RLM1 conserved 632"
II	Conserved	Doniger and Fay	288140	288151	1	+	.	Binding "RLR1 conserved 633"
II	Conserved	Doniger and Fay	288150	288157	1	-	.	Binding "SPT23 conserved 634"
II	Conserved	Doniger and Fay	288180	288190	1	+	.	Binding "HAP1 conserved 635"
II	Conserved	Doniger and Fay	288185	288192	1	+	.	Binding "SWI6 conserved 636"
II	Conserved	Doniger and Fay	288186	288192	1	+	.	Binding "MBP1 conserved 637"
II	Conserved	Doniger and Fay	288189	288199	1	-	.	Binding "HAP1 conserved 638"
II	Conserved	Doniger and Fay	288195	288207	1	+	.	Binding "NDD1 conserved 639"
II	Conserved	Doniger and Fay	288218	288223	1	+	.	Binding "RTG3 conserved 640"
II	Conserved	Doniger and Fay	288613	288622	1	-	.	Binding "NDT80 conserved 641"
II	Conserved	Doniger and Fay	288613	288623	1	-	.	Binding "SUM1 conserved 642"
II	Conserved	Doniger and Fay	288618	288624	1	+	.	Binding "GCN4 conserved 643"
II	Conserved	Doniger and Fay	289231	289239	1	+	.	Binding "ROX1 conserved 644"
II	Conserved	Doniger and Fay	290532	290542	1	-	.	Binding "FHL1 conserved (Convergent, not counted) 645"
II	Conserved	Doniger and Fay	290532	290541	1	-	.	Binding "RAP1 conserved (Convergent, not counted) 646"
II	Conserved	Doniger and Fay	290533	290542	1	+	.	Binding "SFP1 conserved (Convergent, not counted) 647"
II	Conserved	Doniger and Fay	291904	291910	1	-	.	Binding "XBP1 conserved 648"
II	Conserved	Doniger and Fay	291960	291964	1	-	.	Binding "DAL80 conserved 649"
II	Conserved	Doniger and Fay	292108	292120	1	-	.	Binding "HSF1 conserved 650"
II	Conserved	Doniger and Fay	292362	292373	1	-	.	Binding "THI2 conserved 651"
II	Conserved	Doniger and Fay	292370	292378	1	-	.	Binding "SWI4 conserved 652"
II	Conserved	Doniger and Fay	292370	292377	1	+	.	Binding "SWI6 conserved 653"
II	Conserved	Doniger and Fay	292413	292420	1	+	.	Binding "CIN5 conserved 654"
II	Conserved	Doniger and Fay	292421	292429	1	+	.	Binding "ROX1 conserved 655"
II	Conserved	Doniger and Fay	294176	294185	1	+	.	Binding "SUT1 conserved 656"
II	Conserved	Doniger and Fay	294177	294184	1	-	.	Binding "PHD1 conserved 657"
II	Conserved	Doniger and Fay	294181	294186	1	+	.	Binding "ADR1 conserved 658"
II	Conserved	Doniger and Fay	296050	296056	1	-	.	Binding "DAL82 conserved 659"
II	Conserved	Doniger and Fay	296051	296056	1	-	.	Binding "GZF3 conserved 660"
II	Conserved	Doniger and Fay	296267	296274	1	-	.	Binding "CIN5 conserved 661"
II	Conserved	Doniger and Fay	297869	297876	1	+	.	Binding "FKH1 conserved 662"
II	Conserved	Doniger and Fay	297869	297880	1	-	.	Binding "FKH2 conserved 663"
II	Conserved	Doniger and Fay	297899	297898	1	+	.	Binding "INO2 conserved 664"
II	Conserved	Doniger and Fay	297910	297909	1	-	.	Binding "INO2 conserved 665"
II	Conserved	Doniger and Fay	297939	297951	1	-	.	Binding "ABF1 conserved 666"
II	Conserved	Doniger and Fay	298179	298186	1	+	.	Binding "SPT23 conserved 667"
II	Conserved	Doniger and Fay	304786	304785	1	+	.	Binding "INO2 conserved (Convergent, not counted) 668"
II	Conserved	Doniger and Fay	304798	304808	1	+	.	Binding "SPT2 conserved (Convergent, not counted) 669"
II	Conserved	Doniger and Fay	306041	306049	1	-	.	Binding "GLN3 conserved 670"
II	Conserved	Doniger and Fay	306095	306101	1	-	.	Binding "REB1 conserved 671"
II	Conserved	Doniger and Fay	306161	306167	1	-	.	Binding "REB1 conserved 672"
II	Conserved	Doniger and Fay	307025	307034	1	+	.	Binding "CAD1 conserved 673"
II	Conserved	Doniger and Fay	307026	307032	1	-	.	Binding "GCN4 conserved 674"
II	Conserved	Doniger and Fay	307077	307083	1	-	.	Binding "REB1 conserved 675"
II	Conserved	Doniger and Fay	307196	307207	1	-	.	Binding "YOX1 conserved 676"
II	Conserved	Doniger and Fay	307280	307286	1	+	.	Binding "XBP1 conserved 677"
II	Conserved	Doniger and Fay	307484	307492	1	+	.	Binding "SWI4 conserved 678"
II	Conserved	Doniger and Fay	307485	307492	1	-	.	Binding "SWI6 conserved 679"
II	Conserved	Doniger and Fay	308058	308063	1	-	.	Binding "AFT2 conserved 680"
II	Conserved	Doniger and Fay	308059	308069	1	-	.	Binding "FHL1 conserved 681"
II	Conserved	Doniger and Fay	308059	308068	1	-	.	Binding "RAP1 conserved 682"
II	Conserved	Doniger and Fay	308060	308069	1	+	.	Binding "SFP1 conserved 683"
II	Conserved	Doniger and Fay	308152	308162	1	-	.	Binding "SUM1 conserved 684"
II	Conserved	Doniger and Fay	308163	308175	1	-	.	Binding "ABF1 conserved 685"
II	Conserved	Doniger and Fay	308172	308181	1	+	.	Binding "NDT80 conserved 686"
II	Conserved	Doniger and Fay	308243	308247	1	-	.	Binding "DAL80 conserved 687"
II	Conserved	Doniger and Fay	308342	308353	1	+	.	Binding "RLR1 conserved 688"
II	Conserved	Doniger and Fay	308344	308353	1	-	.	Binding "STB1 conserved 689"
II	Semi-conserved	Doniger and Fay	308594	308604	1	+	.	Binding "SPT2 loss on Smik with turnover 315 bp away 690"
II	Conserved	Doniger and Fay	308621	308629	1	-	.	Binding "ROX1 conserved 691"
II	Conserved	Doniger and Fay	311524	311532	1	-	.	Binding "ROX1 conserved 692"
II	Conserved	Doniger and Fay	311680	311687	1	+	.	Binding "FKH1 conserved 693"
II	Conserved	Doniger and Fay	311680	311691	1	-	.	Binding "FKH2 conserved 694"
II	Conserved	Doniger and Fay	311758	311764	1	+	.	Binding "XBP1 conserved 695"
II	Conserved	Doniger and Fay	314909	314916	1	-	.	Binding "CIN5 conserved 696"
II	Conserved	Doniger and Fay	315365	315371	1	+	.	Binding "CBF1 conserved 697"
II	Conserved	Doniger and Fay	315365	315371	1	-	.	Binding "PHO4 conserved 698"
II	Conserved	Doniger and Fay	315365	315373	1	+	.	Binding "TYE7 conserved 699"
II	Conserved	Doniger and Fay	315380	315384	1	+	.	Binding "HAP2 conserved 700"
II	Conserved	Doniger and Fay	316542	316547	1	-	.	Binding "SKO1 conserved 701"
II	Conserved	Doniger and Fay	316563	316569	1	+	.	Binding "DIG1 conserved 702"
II	Conserved	Doniger and Fay	316563	316569	1	+	.	Binding "STE12 conserved 703"
II	Conserved	Doniger and Fay	316574	316579	1	+	.	Binding "ASH1 conserved 704"
II	Conserved	Doniger and Fay	316579	316590	1	-	.	Binding "SIG1 conserved 705"
II	Conserved	Doniger and Fay	316646	316659	1	+	.	Binding "SMP1 conserved 706"
II	Conserved	Doniger and Fay	316652	316662	1	-	.	Binding "SPT2 conserved 707"
II	Conserved	Doniger and Fay	316659	316664	1	+	.	Binding "MOT3 conserved 708"
II	Conserved	Doniger and Fay	316750	316756	1	-	.	Binding "DIG1 conserved 709"
II	Conserved	Doniger and Fay	316750	316756	1	-	.	Binding "STE12 conserved 710"
II	Conserved	Doniger and Fay	316756	316765	1	-	.	Binding "SFP1 conserved 711"
II	Conserved	Doniger and Fay	316795	316801	1	+	.	Binding "DIG1 conserved 712"
II	Conserved	Doniger and Fay	316795	316801	1	+	.	Binding "STE12 conserved 713"
II	Conserved	Doniger and Fay	316924	316935	1	+	.	Binding "FKH2 conserved 714"
II	Conserved	Doniger and Fay	316928	316935	1	-	.	Binding "FKH1 conserved 715"
II	Conserved	Doniger and Fay	323948	323952	1	-	.	Binding "DAL80 conserved 716"
II	Conserved	Doniger and Fay	324078	324086	1	-	.	Binding "GLN3 conserved 717"
II	Conserved	Doniger and Fay	324080	324086	1	-	.	Binding "DAL82 conserved 718"
II	Conserved	Doniger and Fay	324081	324087	1	-	.	Binding "GAT1 conserved 719"
II	Conserved	Doniger and Fay	324081	324086	1	-	.	Binding "GZF3 conserved 720"
II	Conserved	Doniger and Fay	324082	324086	1	-	.	Binding "DAL80 conserved 721"
II	Semi-conserved	Doniger and Fay	324135	324141	1	+	.	Binding "TEC1 loss on Smik 722"
II	Conserved	Doniger and Fay	324202	324208	1	-	.	Binding "RGT1 conserved 723"
II	Conserved	Doniger and Fay	324229	324236	1	+	.	Binding "SOK2 conserved 724"
II	Conserved	Doniger and Fay	324301	324306	1	+	.	Binding "BAS1 conserved 725"
II	Conserved	Doniger and Fay	324301	324307	1	+	.	Binding "GCN4 conserved 726"
II	Conserved	Doniger and Fay	330169	330174	1	+	.	Binding "MOT3 conserved 727"
II	Conserved	Doniger and Fay	330289	330298	1	-	.	Binding "NDT80 conserved 728"
II	Conserved	Doniger and Fay	330348	330357	1	-	.	Binding "NDT80 conserved 729"
II	Conserved	Doniger and Fay	330348	330357	1	-	.	Binding "STB1 conserved 730"
II	Conserved	Doniger and Fay	330348	330356	1	-	.	Binding "SWI4 conserved 731"
II	Semi-conserved	Doniger and Fay	331653	331662	1	+	.	Binding "UGA3 loss on Scer 732"
II	Conserved	Doniger and Fay	332959	332969	1	-	.	Binding "PDR1 conserved (Convergent, not counted) 733"
II	Conserved	Doniger and Fay	333009	333018	1	+	.	Binding "CAD1 conserved (Convergent, not counted) 734"
II	Conserved	Doniger and Fay	333010	333016	1	-	.	Binding "ARR1 conserved (Convergent, not counted) 735"
II	Conserved	Doniger and Fay	333010	333016	1	-	.	Binding "YAP3 conserved (Convergent, not counted) 736"
II	Conserved	Doniger and Fay	333014	333019	1	+	.	Binding "YHP1 conserved (Convergent, not counted) 737"
II	Conserved	Doniger and Fay	333017	333024	1	+	.	Binding "FKH1 conserved (Convergent, not counted) 738"
II	Conserved	Doniger and Fay	336843	336848	1	-	.	Binding "SWI5 conserved 739"
II	Conserved	Doniger and Fay	336913	336920	1	+	.	Binding "FKH1 conserved 740"
II	Conserved	Doniger and Fay	336913	336924	1	-	.	Binding "FKH2 conserved 741"
II	Conserved	Doniger and Fay	336940	336946	1	+	.	Binding "REB1 conserved 742"
II	Conserved	Doniger and Fay	337026	337032	1	+	.	Binding "NRG1 conserved 743"
II	Conserved	Doniger and Fay	337030	337039	1	-	.	Binding "SUT1 conserved 744"
II	Conserved	Doniger and Fay	337046	337054	1	+	.	Binding "RPN4 conserved 745"
II	Conserved	Doniger and Fay	337050	337055	1	-	.	Binding "AFT2 conserved 746"
II	Conserved	Doniger and Fay	337078	337084	1	+	.	Binding "REB1 conserved 747"
II	Conserved	Doniger and Fay	337103	337109	1	+	.	Binding "CBF1 conserved 748"
II	Conserved	Doniger and Fay	337103	337109	1	-	.	Binding "PHO4 conserved 749"
II	Conserved	Doniger and Fay	337103	337111	1	+	.	Binding "TYE7 conserved 750"
II	Semi-conserved	Doniger and Fay	337156	337166	1	+	.	Binding "SPT2 loss on Smik with turnover -264 bp away 751"
II	Conserved	Doniger and Fay	338483	338494	1	+	.	Binding "SIG1 conserved 752"
II	Conserved	Doniger and Fay	338484	338490	1	+	.	Binding "GCN4 conserved 753"
II	Conserved	Doniger and Fay	338509	338514	1	+	.	Binding "BAS1 conserved 754"
II	Conserved	Doniger and Fay	338514	338519	1	-	.	Binding "ADR1 conserved 755"
II	Conserved	Doniger and Fay	338518	338524	1	-	.	Binding "PHO4 conserved 756"
II	Conserved	Doniger and Fay	338557	338569	1	-	.	Binding "CSRE conserved 757"
II	Conserved	Doniger and Fay	339496	339504	1	-	.	Binding "MSN2 conserved 758"
II	Conserved	Doniger and Fay	340867	340873	1	+	.	Binding "REB1 conserved 759"
II	Conserved	Doniger and Fay	341258	341270	1	-	.	Binding "MCM1 conserved 760"
II	Conserved	Doniger and Fay	341258	341270	1	-	.	Binding "NDD1 conserved 761"
II	Conserved	Doniger and Fay	341263	341269	1	-	.	Binding "ARR1 conserved 762"
II	Conserved	Doniger and Fay	341263	341269	1	-	.	Binding "YAP3 conserved 763"
II	Conserved	Doniger and Fay	341425	341431	1	+	.	Binding "ARR1 conserved 764"
II	Conserved	Doniger and Fay	341425	341431	1	+	.	Binding "GCN4 conserved 765"
II	Conserved	Doniger and Fay	341425	341431	1	+	.	Binding "YAP3 conserved 766"
II	Conserved	Doniger and Fay	341430	341435	1	-	.	Binding "YHP1 conserved 767"
II	Conserved	Doniger and Fay	341466	341471	1	+	.	Binding "MOT3 conserved 768"
II	Conserved	Doniger and Fay	341542	341553	1	-	.	Binding "FKH2 conserved 769"
II	Conserved	Doniger and Fay	341623	341629	1	-	.	Binding "RGT1 conserved 770"
II	Conserved	Doniger and Fay	341661	341667	1	-	.	Binding "TEC1 conserved 771"
II	Conserved	Doniger and Fay	341700	341706	1	-	.	Binding "REB1 conserved 772"
II	Conserved	Doniger and Fay	341818	341825	1	+	.	Binding "PHD1 conserved 773"
II	Conserved	Doniger and Fay	341854	341859	1	-	.	Binding "BAS1 conserved 774"
II	Conserved	Doniger and Fay	341863	341868	1	-	.	Binding "MOT3 conserved 775"
II	Conserved	Doniger and Fay	341884	341891	1	-	.	Binding "SOK2 conserved 776"
II	Conserved	Doniger and Fay	341908	341914	1	+	.	Binding "RGT1 conserved 777"
II	Conserved	Doniger and Fay	342262	342268	1	+	.	Binding "REB1 conserved 778"
II	Conserved	Doniger and Fay	342427	342438	1	+	.	Binding "YOX1 conserved 779"
II	Conserved	Doniger and Fay	342428	342440	1	-	.	Binding "HSF1 conserved 780"
II	Conserved	Doniger and Fay	342472	342477	1	-	.	Binding "MOT3 conserved 781"
II	Conserved	Doniger and Fay	342595	342607	1	+	.	Binding "NDD1 conserved 782"
II	Conserved	Doniger and Fay	342631	342636	1	-	.	Binding "YHP1 conserved 783"
II	Conserved	Doniger and Fay	342797	342803	1	-	.	Binding "GCN4 conserved 784"
II	Conserved	Doniger and Fay	342797	342805	1	+	.	Binding "YAP1 conserved 785"
II	Conserved	Doniger and Fay	342798	342808	1	+	.	Binding "SUM1 conserved 786"
II	Conserved	Doniger and Fay	342801	342806	1	-	.	Binding "SWI5 conserved 787"
II	Conserved	Doniger and Fay	342965	342976	1	+	.	Binding "RLR1 conserved 788"
II	Conserved	Doniger and Fay	343030	343037	1	-	.	Binding "SPT23 conserved 789"
II	Conserved	Doniger and Fay	343069	343079	1	+	.	Binding "SUM1 conserved 790"
II	Conserved	Doniger and Fay	344575	344582	1	-	.	Binding "FKH1 conserved (Convergent, not counted) 791"
II	Conserved	Doniger and Fay	353329	353335	1	+	.	Binding "TEC1 conserved 792"
II	Conserved	Doniger and Fay	353364	353372	1	+	.	Binding "TYE7 conserved 793"
II	Conserved	Doniger and Fay	353389	353394	1	+	.	Binding "ASH1 conserved 794"
II	Conserved	Doniger and Fay	353464	353473	1	+	.	Binding "SUT1 conserved 795"
II	Conserved	Doniger and Fay	356049	356053	1	+	.	Binding "DAL80 conserved 796"
II	Conserved	Doniger and Fay	356063	356069	1	-	.	Binding "TEC1 conserved 797"
II	Semi-conserved	Doniger and Fay	356640	356651	1	+	.	Binding "RLR1 loss on Scer-Spar with turnover 42 bp away 798"
II	Conserved	Doniger and Fay	356767	356772	1	-	.	Binding "YHP1 conserved 799"
II	Conserved	Doniger and Fay	360197	360206	1	+	.	Binding "CAD1 conserved 800"
II	Conserved	Doniger and Fay	360227	360234	1	-	.	Binding "FKH1 conserved 801"
II	Conserved	Doniger and Fay	360238	360244	1	-	.	Binding "RIM101 conserved 802"
II	Conserved	Doniger and Fay	360349	360355	1	+	.	Binding "GCN4 conserved 803"
II	Conserved	Doniger and Fay	360365	360370	1	+	.	Binding "ADR1 conserved 804"
II	Conserved	Doniger and Fay	362520	362525	1	-	.	Binding "YHP1 conserved 805"
II	Conserved	Doniger and Fay	362713	362723	1	+	.	Binding "FHL1 conserved 806"
II	Conserved	Doniger and Fay	362714	362723	1	+	.	Binding "RAP1 conserved 807"
II	Conserved	Doniger and Fay	362719	362724	1	+	.	Binding "AFT2 conserved 808"
II	Conserved	Doniger and Fay	362733	362744	1	+	.	Binding "RLR1 conserved 809"
II	Conserved	Doniger and Fay	362969	362979	1	+	.	Binding "SPT2 conserved 810"
II	Conserved	Doniger and Fay	363463	363474	1	-	.	Binding "FKH2 conserved 811"
II	Conserved	Doniger and Fay	363474	363479	1	-	.	Binding "MOT3 conserved 812"
II	Conserved	Doniger and Fay	363474	363481	1	-	.	Binding "SOK2 conserved 813"
II	Conserved	Doniger and Fay	363487	363498	1	-	.	Binding "SIG1 conserved 814"
II	Conserved	Doniger and Fay	363489	363496	1	-	.	Binding "SPT23 conserved 815"
II	Conserved	Doniger and Fay	363491	363497	1	-	.	Binding "STE12 conserved 816"
II	Semi-conserved	Doniger and Fay	363772	363779	1	+	.	Binding "SPT23 loss on Scer with turnover 30 bp away 817"
II	Semi-conserved	Doniger and Fay	364206	364217	1	-	.	Binding "SIG1 loss on Scer with turnover -1513 bp away 818"
II	Conserved	Doniger and Fay	364440	364448	1	+	.	Binding "RPN4 conserved 819"
II	Conserved	Doniger and Fay	365805	365811	1	-	.	Binding "MBP1 conserved 820"
II	Conserved	Doniger and Fay	365818	365828	1	-	.	Binding "SNT2 conserved 821"
II	Conserved	Doniger and Fay	369832	369838	1	+	.	Binding "REB1 conserved 822"
II	Conserved	Doniger and Fay	370011	370017	1	-	.	Binding "DIG1 conserved 823"
II	Conserved	Doniger and Fay	370838	370849	1	+	.	Binding "FKH2 conserved 824"
II	Conserved	Doniger and Fay	370858	370863	1	+	.	Binding "AFT2 conserved 825"
II	Conserved	Doniger and Fay	370870	370875	1	-	.	Binding "MOT3 conserved 826"
II	Conserved	Doniger and Fay	370891	370898	1	-	.	Binding "SOK2 conserved 827"
II	Conserved	Doniger and Fay	370955	370961	1	+	.	Binding "TEC1 conserved 828"
II	Conserved	Doniger and Fay	370987	370993	1	+	.	Binding "STE12 conserved 829"
II	Conserved	Doniger and Fay	371026	371037	1	+	.	Binding "THI2 conserved 830"
II	Conserved	Doniger and Fay	371067	371073	1	-	.	Binding "DAL82 conserved 831"
II	Conserved	Doniger and Fay	371068	371074	1	-	.	Binding "GAT1 conserved 832"
II	Conserved	Doniger and Fay	371068	371073	1	-	.	Binding "GZF3 conserved 833"
II	Conserved	Doniger and Fay	371069	371073	1	-	.	Binding "DAL80 conserved 834"
II	Conserved	Doniger and Fay	371084	371091	1	+	.	Binding "PHD1 conserved 835"
II	Conserved	Doniger and Fay	371101	371107	1	+	.	Binding "PHO4 conserved 836"
II	Conserved	Doniger and Fay	371105	371110	1	+	.	Binding "SWI5 conserved 837"
II	Conserved	Doniger and Fay	371106	371115	1	-	.	Binding "CAD1 conserved 838"
II	Conserved	Doniger and Fay	371106	371114	1	-	.	Binding "YAP1 conserved 839"
II	Conserved	Doniger and Fay	371112	371121	1	+	.	Binding "STB1 conserved 840"
II	Conserved	Doniger and Fay	371113	371121	1	+	.	Binding "SWI4 conserved 841"
II	Conserved	Doniger and Fay	371238	371244	1	+	.	Binding "TEC1 conserved 842"
II	Conserved	Doniger and Fay	371409	371415	1	-	.	Binding "RIM101 conserved 843"
II	Semi-conserved	Doniger and Fay	371464	371471	1	+	.	Binding "SOK2 loss on Smik with turnover 206 bp away 844"
II	Conserved	Doniger and Fay	371513	371519	1	+	.	Binding "DIG1 conserved 845"
II	Conserved	Doniger and Fay	371660	371666	1	+	.	Binding "CBF1 conserved 846"
II	Conserved	Doniger and Fay	371660	371659	1	-	.	Binding "INO2 conserved 847"
II	Conserved	Doniger and Fay	371660	371666	1	-	.	Binding "PHO4 conserved 848"
II	Conserved	Doniger and Fay	371660	371668	1	+	.	Binding "TYE7 conserved 849"
II	Conserved	Doniger and Fay	371693	371699	1	-	.	Binding "NRG1 conserved 850"
II	Conserved	Doniger and Fay	371760	371766	1	-	.	Binding "RIM101 conserved 851"
II	Conserved	Doniger and Fay	371783	371789	1	-	.	Binding "NRG1 conserved 852"
II	Conserved	Doniger and Fay	371784	371789	1	+	.	Binding "AFT2 conserved 853"
II	Conserved	Doniger and Fay	371826	371832	1	-	.	Binding "MAC1 conserved 854"
II	Conserved	Doniger and Fay	371853	371859	1	-	.	Binding "ARR1 conserved 855"
II	Conserved	Doniger and Fay	371853	371859	1	-	.	Binding "YAP3 conserved 856"
II	Conserved	Doniger and Fay	372035	372042	1	-	.	Binding "CIN5 conserved 857"
II	Conserved	Doniger and Fay	375871	375882	1	+	.	Binding "RLR1 conserved 858"
II	Semi-conserved	Doniger and Fay	375893	375899	1	-	.	Binding "GCN4 loss on Smik with turnover 119 bp away 859"
II	Semi-conserved	Doniger and Fay	375894	375899	1	-	.	Binding "BAS1 loss on Smik with turnover 547 bp away 860"
II	Conserved	Doniger and Fay	376064	376073	1	-	.	Binding "LEU3 conserved 861"
II	Conserved	Doniger and Fay	376064	376073	1	+	.	Binding "UGA3 conserved 862"
II	Conserved	Doniger and Fay	376216	376228	1	-	.	Binding "STP1 conserved 863"
II	Semi-conserved	Doniger and Fay	378532	378543	1	-	.	Binding "FKH2 loss on Scer with turnover 61 bp away 864"
II	Conserved	Doniger and Fay	378571	378580	1	+	.	Binding "NDT80 conserved 865"
II	Conserved	Doniger and Fay	378764	378769	1	-	.	Binding "MOT3 conserved 866"
II	Conserved	Doniger and Fay	378843	378853	1	-	.	Binding "PDR1 conserved 867"
II	Conserved	Doniger and Fay	378851	378860	1	-	.	Binding "SUT1 conserved 868"
II	Conserved	Doniger and Fay	378856	378865	1	-	.	Binding "SUT1 conserved 869"
II	Conserved	Doniger and Fay	380096	380105	1	-	.	Binding "STB1 conserved 870"
II	Conserved	Doniger and Fay	380096	380104	1	-	.	Binding "SWI4 conserved 871"
II	Conserved	Doniger and Fay	380096	380103	1	+	.	Binding "SWI6 conserved 872"
II	Conserved	Doniger and Fay	380098	380104	1	-	.	Binding "MBP1 conserved 873"
II	Conserved	Doniger and Fay	380123	380130	1	-	.	Binding "SWI6 conserved 874"
II	Conserved	Doniger and Fay	380124	380130	1	+	.	Binding "REB1 conserved 875"
II	Conserved	Doniger and Fay	381160	381172	1	+	.	Binding "HSF1 conserved 876"
II	Conserved	Doniger and Fay	381174	381181	1	-	.	Binding "CIN5 conserved 877"
II	Conserved	Doniger and Fay	381221	381227	1	-	.	Binding "DIG1 conserved 878"
II	Conserved	Doniger and Fay	381221	381227	1	-	.	Binding "STE12 conserved 879"
II	Conserved	Doniger and Fay	381223	381234	1	-	.	Binding "YOX1 conserved 880"
II	Conserved	Doniger and Fay	381289	381294	1	+	.	Binding "YHP1 conserved 881"
II	Conserved	Doniger and Fay	381293	381300	1	-	.	Binding "SPT23 conserved 882"
II	Conserved	Doniger and Fay	381391	381400	1	-	.	Binding "STB5 conserved 883"
II	Conserved	Doniger and Fay	381459	381465	1	-	.	Binding "RIM101 conserved 884"
II	Semi-conserved	Doniger and Fay	381592	381600	1	+	.	Binding "ROX1 loss on Smik with turnover -106 bp away 885"
II	Conserved	Doniger and Fay	381697	381702	1	-	.	Binding "ADR1 conserved 886"
II	Conserved	Doniger and Fay	381724	381729	1	+	.	Binding "AFT2 conserved 887"
II	Conserved	Doniger and Fay	381872	381881	1	+	.	Binding "RLM1 conserved 888"
II	Conserved	Doniger and Fay	383069	383078	1	+	.	Binding "RLM1 conserved 889"
II	Semi-conserved	Doniger and Fay	393206	393217	1	-	.	Binding "THI2 loss on Smik with turnover 101 bp away (Convergent, not counted) 890"
II	Conserved	Doniger and Fay	393208	393219	1	-	.	Binding "SIG1 conserved (Convergent, not counted) 891"
II	Conserved	Doniger and Fay	393367	393378	1	-	.	Binding "RLR1 conserved (Convergent, not counted) 892"
II	Conserved	Doniger and Fay	398415	398421	1	-	.	Binding "REB1 conserved 893"
II	Conserved	Doniger and Fay	398502	398506	1	-	.	Binding "DAL80 conserved 894"
II	Conserved	Doniger and Fay	400971	400975	1	+	.	Binding "HAP2 conserved 895"
II	Conserved	Doniger and Fay	401006	401018	1	-	.	Binding "ABF1 conserved 896"
II	Conserved	Doniger and Fay	401053	401058	1	-	.	Binding "SKO1 conserved 897"
II	Conserved	Doniger and Fay	401193	401198	1	+	.	Binding "GZF3 conserved 898"
II	Conserved	Doniger and Fay	407170	407182	1	-	.	Binding "HSF1 conserved 899"
II	Conserved	Doniger and Fay	407174	407185	1	+	.	Binding "THI2 conserved 900"
II	Conserved	Doniger and Fay	407265	407271	1	-	.	Binding "XBP1 conserved 901"
II	Conserved	Doniger and Fay	407273	407272	1	-	.	Binding "INO2 conserved 902"
II	Conserved	Doniger and Fay	407527	407533	1	+	.	Binding "TEC1 conserved 903"
II	Conserved	Doniger and Fay	407544	407550	1	-	.	Binding "TEC1 conserved 904"
II	Conserved	Doniger and Fay	407643	407649	1	+	.	Binding "TEC1 conserved 905"
II	Conserved	Doniger and Fay	408474	408483	1	-	.	Binding "NDT80 conserved 906"
II	Conserved	Doniger and Fay	408474	408484	1	-	.	Binding "SUM1 conserved 907"
II	Conserved	Doniger and Fay	408498	408502	1	-	.	Binding "DAL80 conserved 908"
II	Conserved	Doniger and Fay	408512	408518	1	-	.	Binding "DIG1 conserved 909"
II	Conserved	Doniger and Fay	408512	408518	1	-	.	Binding "STE12 conserved 910"
II	Conserved	Doniger and Fay	408525	408537	1	+	.	Binding "CSRE conserved 911"
II	Conserved	Doniger and Fay	408546	408554	1	+	.	Binding "YAP1 conserved 912"
II	Conserved	Doniger and Fay	408550	408555	1	-	.	Binding "SWI5 conserved 913"
II	Conserved	Doniger and Fay	408569	408576	1	-	.	Binding "PHD1 conserved 914"
II	Conserved	Doniger and Fay	408569	408578	1	+	.	Binding "UGA3 conserved 915"
II	Conserved	Doniger and Fay	408585	408592	1	+	.	Binding "PDR3 conserved 916"
II	Conserved	Doniger and Fay	408585	408594	1	+	.	Binding "SUT1 conserved 917"
II	Conserved	Doniger and Fay	408597	408608	1	-	.	Binding "THI2 conserved 918"
II	Conserved	Doniger and Fay	408631	408637	1	-	.	Binding "DIG1 conserved 919"
II	Conserved	Doniger and Fay	408631	408637	1	-	.	Binding "STE12 conserved 920"
II	Conserved	Doniger and Fay	408718	408724	1	-	.	Binding "MAC1 conserved 921"
II	Conserved	Doniger and Fay	408722	408721	1	+	.	Binding "INO2 conserved 922"
II	Conserved	Doniger and Fay	408862	408868	1	+	.	Binding "DIG1 conserved 923"
II	Conserved	Doniger and Fay	408862	408868	1	+	.	Binding "STE12 conserved 924"
II	Conserved	Doniger and Fay	408927	408933	1	+	.	Binding "DIG1 conserved 925"
II	Conserved	Doniger and Fay	408927	408933	1	+	.	Binding "STE12 conserved 926"
II	Conserved	Doniger and Fay	410624	410634	1	-	.	Binding "SPT2 conserved 927"
II	Conserved	Doniger and Fay	410819	410829	1	-	.	Binding "SUM1 conserved 928"
II	Conserved	Doniger and Fay	410826	410833	1	-	.	Binding "SWI6 conserved 929"
II	Conserved	Doniger and Fay	410851	410861	1	-	.	Binding "SNT2 conserved 930"
II	Conserved	Doniger and Fay	410934	410940	1	-	.	Binding "XBP1 conserved 931"
II	Conserved	Doniger and Fay	416975	416982	1	+	.	Binding "FKH1 conserved (Convergent, not counted) 932"
II	Semi-conserved	Doniger and Fay	417386	417397	1	-	.	Binding "RLR1 loss on Scer-Spar with turnover -107 bp away (Convergent, not counted) 933"
II	Conserved	Doniger and Fay	418223	418230	1	+	.	Binding "SOK2 conserved (Convergent, not counted) 934"
II	Semi-conserved	Doniger and Fay	418798	418807	1	+	.	Binding "CAD1 loss on Smik with turnover -60 bp away (Convergent, not counted) 935"
II	Conserved	Doniger and Fay	419280	419286	1	-	.	Binding "RGT1 conserved 936"
II	Conserved	Doniger and Fay	419285	419294	1	+	.	Binding "STB5 conserved 937"
II	Conserved	Doniger and Fay	419358	419367	1	+	.	Binding "STB1 conserved 938"
II	Conserved	Doniger and Fay	419359	419367	1	+	.	Binding "SWI4 conserved 939"
II	Conserved	Doniger and Fay	419360	419367	1	-	.	Binding "SWI6 conserved 940"
II	Conserved	Doniger and Fay	419364	419371	1	+	.	Binding "SPT23 conserved 941"
II	Conserved	Doniger and Fay	419375	419381	1	+	.	Binding "REB1 conserved 942"
II	Conserved	Doniger and Fay	419423	419430	1	-	.	Binding "CIN5 conserved 943"
II	Conserved	Doniger and Fay	419423	419428	1	-	.	Binding "SKO1 conserved 944"
II	Conserved	Doniger and Fay	423182	423190	1	-	.	Binding "MSN2 conserved 945"
II	Conserved	Doniger and Fay	423183	423188	1	-	.	Binding "AFT2 conserved 946"
II	Conserved	Doniger and Fay	423184	423189	1	-	.	Binding "ADR1 conserved 947"
II	Conserved	Doniger and Fay	423369	423376	1	-	.	Binding "FKH1 conserved 948"
II	Semi-conserved	Doniger and Fay	423436	423443	1	+	.	Binding "SPT23 loss on Scer with turnover -23 bp away 949"
II	Conserved	Doniger and Fay	423451	423457	1	-	.	Binding "XBP1 conserved 950"
II	Conserved	Doniger and Fay	423457	423462	1	-	.	Binding "BAS1 conserved 951"
II	Conserved	Doniger and Fay	423470	423475	1	-	.	Binding "ASH1 conserved 952"
II	Conserved	Doniger and Fay	423673	423679	1	-	.	Binding "MBP1 conserved 953"
II	Conserved	Doniger and Fay	425848	425854	1	+	.	Binding "TEC1 conserved 954"
II	Conserved	Doniger and Fay	425948	425957	1	-	.	Binding "STB1 conserved 955"
II	Conserved	Doniger and Fay	425948	425956	1	-	.	Binding "SWI4 conserved 956"
II	Conserved	Doniger and Fay	425948	425955	1	+	.	Binding "SWI6 conserved 957"
II	Conserved	Doniger and Fay	425950	425956	1	-	.	Binding "MBP1 conserved 958"
II	Conserved	Doniger and Fay	425955	425964	1	-	.	Binding "STB1 conserved 959"
II	Conserved	Doniger and Fay	425955	425963	1	-	.	Binding "SWI4 conserved 960"
II	Conserved	Doniger and Fay	425955	425962	1	+	.	Binding "SWI6 conserved 961"
II	Conserved	Doniger and Fay	425957	425963	1	-	.	Binding "MBP1 conserved 962"
II	Conserved	Doniger and Fay	426015	426020	1	-	.	Binding "SWI5 conserved 963"
II	Conserved	Doniger and Fay	426524	426530	1	-	.	Binding "ARR1 conserved 964"
II	Conserved	Doniger and Fay	426524	426530	1	-	.	Binding "YAP3 conserved 965"
II	Conserved	Doniger and Fay	426537	426549	1	-	.	Binding "ABF1 conserved 966"
II	Conserved	Doniger and Fay	426544	426555	1	+	.	Binding "FKH2 conserved 967"
II	Conserved	Doniger and Fay	426547	426551	1	+	.	Binding "DAL80 conserved 968"
II	Conserved	Doniger and Fay	426548	426555	1	-	.	Binding "FKH1 conserved 969"
II	Conserved	Doniger and Fay	426641	426649	1	+	.	Binding "MSN2 conserved 970"
II	Conserved	Doniger and Fay	426643	426652	1	-	.	Binding "UME6 conserved 971"
II	Conserved	Doniger and Fay	426945	426944	1	+	.	Binding "INO2 conserved 972"
II	Conserved	Doniger and Fay	426945	426951	1	+	.	Binding "PHO4 conserved 973"
II	Conserved	Doniger and Fay	426964	426973	1	+	.	Binding "UME6 conserved 974"
II	Conserved	Doniger and Fay	426965	426973	1	-	.	Binding "SKN7 conserved 975"
II	Conserved	Doniger and Fay	426972	426982	1	+	.	Binding "PDR1 conserved 976"
II	Conserved	Doniger and Fay	427027	427035	1	+	.	Binding "TYE7 conserved 977"
II	Conserved	Doniger and Fay	427028	427034	1	-	.	Binding "CBF1 conserved 978"
II	Conserved	Doniger and Fay	427028	427034	1	+	.	Binding "PHO4 conserved 979"
II	Conserved	Doniger and Fay	435745	435751	1	-	.	Binding "REB1 conserved 980"
II	Semi-conserved	Doniger and Fay	435749	435758	1	+	.	Binding "UGA3 loss on Smik 981"
II	Conserved	Doniger and Fay	441401	441407	1	-	.	Binding "MBP1 conserved 982"
II	Conserved	Doniger and Fay	441439	441446	1	+	.	Binding "CIN5 conserved 983"
II	Conserved	Doniger and Fay	441439	441450	1	+	.	Binding "FKH2 conserved 984"
II	Conserved	Doniger and Fay	441443	441450	1	-	.	Binding "FKH1 conserved 985"
II	Conserved	Doniger and Fay	444846	444858	1	+	.	Binding "HSF1 conserved 986"
II	Conserved	Doniger and Fay	444874	444886	1	+	.	Binding "ABF1 conserved 987"
II	Conserved	Doniger and Fay	447471	447477	1	+	.	Binding "MAC1 conserved 988"
II	Conserved	Doniger and Fay	447475	447484	1	+	.	Binding "STB1 conserved 989"
II	Conserved	Doniger and Fay	447476	447484	1	+	.	Binding "SWI4 conserved 990"
II	Conserved	Doniger and Fay	447480	447491	1	+	.	Binding "FKH2 conserved 991"
II	Conserved	Doniger and Fay	447484	447491	1	-	.	Binding "FKH1 conserved 992"
II	Conserved	Doniger and Fay	450848	450855	1	+	.	Binding "SOK2 conserved (Convergent, not counted) 993"
II	Conserved	Doniger and Fay	452091	452101	1	+	.	Binding "SPT2 conserved 994"
II	Conserved	Doniger and Fay	452149	452156	1	+	.	Binding "SOK2 conserved 995"
II	Conserved	Doniger and Fay	452173	452177	1	-	.	Binding "DAL80 conserved 996"
II	Conserved	Doniger and Fay	452198	452203	1	+	.	Binding "MOT3 conserved 997"
II	Conserved	Doniger and Fay	452274	452285	1	-	.	Binding "RLR1 conserved 998"
II	Conserved	Doniger and Fay	452281	452288	1	+	.	Binding "SPT23 conserved 999"
II	Conserved	Doniger and Fay	452295	452304	1	-	.	Binding "SUT1 conserved 1000"
II	Conserved	Doniger and Fay	452300	452307	1	-	.	Binding "PHD1 conserved 1001"
II	Conserved	Doniger and Fay	452303	452312	1	+	.	Binding "SUT1 conserved 1002"
II	Conserved	Doniger and Fay	452309	452318	1	+	.	Binding "SUT1 conserved 1003"
II	Conserved	Doniger and Fay	452324	452330	1	+	.	Binding "RGT1 conserved 1004"
II	Conserved	Doniger and Fay	452334	452340	1	+	.	Binding "RGT1 conserved 1005"
II	Conserved	Doniger and Fay	452336	452340	1	+	.	Binding "DAL80 conserved 1006"
II	Conserved	Doniger and Fay	452384	452396	1	-	.	Binding "HSF1 conserved 1007"
II	Conserved	Doniger and Fay	452398	452410	1	+	.	Binding "ABF1 conserved 1008"
II	Conserved	Doniger and Fay	452510	452517	1	-	.	Binding "SWI6 conserved 1009"
II	Conserved	Doniger and Fay	452521	452532	1	+	.	Binding "THI2 conserved 1010"
II	Conserved	Doniger and Fay	452542	452547	1	-	.	Binding "MOT3 conserved 1011"
II	Conserved	Doniger and Fay	454656	454664	1	-	.	Binding "YAP1 conserved 1012"
II	Conserved	Doniger and Fay	454684	454690	1	-	.	Binding "NRG1 conserved 1013"
II	Conserved	Doniger and Fay	454688	454702	1	-	.	Binding "MET4 conserved 1014"
II	Conserved	Doniger and Fay	454689	454694	1	-	.	Binding "AFT2 conserved 1015"
II	Conserved	Doniger and Fay	458472	458480	1	-	.	Binding "MSN2 conserved 1016"
II	Conserved	Doniger and Fay	458482	458489	1	+	.	Binding "SWI6 conserved 1017"
II	Conserved	Doniger and Fay	458519	458531	1	+	.	Binding "ABF1 conserved 1018"
II	Semi-conserved	Doniger and Fay	458578	458583	1	+	.	Binding "AFT2 loss on Smik 1019"
II	Conserved	Doniger and Fay	462181	462191	1	-	.	Binding "SPT2 conserved 1020"
II	Conserved	Doniger and Fay	462248	462258	1	-	.	Binding "SUM1 conserved 1021"
II	Conserved	Doniger and Fay	462325	462330	1	+	.	Binding "AFT2 conserved 1022"
II	Conserved	Doniger and Fay	462325	462333	1	+	.	Binding "RCS1 conserved 1023"
II	Conserved	Doniger and Fay	462330	462334	1	+	.	Binding "DAL80 conserved 1024"
II	Conserved	Doniger and Fay	462335	462340	1	-	.	Binding "ASH1 conserved 1025"
II	Conserved	Doniger and Fay	462357	462364	1	+	.	Binding "SPT23 conserved 1026"
II	Conserved	Doniger and Fay	462362	462374	1	-	.	Binding "HSF1 conserved 1027"
II	Conserved	Doniger and Fay	462510	462518	1	-	.	Binding "ROX1 conserved 1028"
II	Conserved	Doniger and Fay	462531	462543	1	-	.	Binding "MCM1 conserved 1029"
II	Conserved	Doniger and Fay	462537	462542	1	+	.	Binding "MOT3 conserved 1030"
II	Conserved	Doniger and Fay	462654	462666	1	-	.	Binding "ABF1 conserved 1031"
II	Conserved	Doniger and Fay	462756	462767	1	+	.	Binding "RLR1 conserved 1032"
II	Conserved	Doniger and Fay	462760	462770	1	+	.	Binding "SPT2 conserved 1033"
II	Conserved	Doniger and Fay	462772	462782	1	+	.	Binding "SPT2 conserved 1034"
II	Semi-conserved	Doniger and Fay	462827	462840	1	-	.	Binding "SMP1 loss on Scer 1035"
II	Conserved	Doniger and Fay	465910	465920	1	-	.	Binding "SUM1 conserved 1036"
II	Conserved	Doniger and Fay	465935	465946	1	-	.	Binding "SIG1 conserved 1037"
II	Conserved	Doniger and Fay	465966	465971	1	-	.	Binding "SKO1 conserved 1038"
II	Conserved	Doniger and Fay	465991	466002	1	+	.	Binding "FKH2 conserved 1039"
II	Conserved	Doniger and Fay	465995	466002	1	-	.	Binding "FKH1 conserved 1040"
II	Conserved	Doniger and Fay	466016	466027	1	-	.	Binding "RLR1 conserved 1041"
II	Conserved	Doniger and Fay	466041	466045	1	+	.	Binding "DAL80 conserved 1042"
II	Conserved	Doniger and Fay	466128	466137	1	+	.	Binding "STB1 conserved 1043"
II	Conserved	Doniger and Fay	466129	466137	1	+	.	Binding "SWI4 conserved 1044"
II	Conserved	Doniger and Fay	466130	466140	1	+	.	Binding "PDR1 conserved 1045"
II	Conserved	Doniger and Fay	466130	466137	1	-	.	Binding "SWI6 conserved 1046"
II	Conserved	Doniger and Fay	466131	466140	1	+	.	Binding "NDT80 conserved 1047"
II	Conserved	Doniger and Fay	466170	466180	1	-	.	Binding "SNT2 conserved 1048"
II	Conserved	Doniger and Fay	466243	466253	1	-	.	Binding "SNT2 conserved 1049"
II	Conserved	Doniger and Fay	466246	466254	1	-	.	Binding "STB4 conserved 1050"
II	Conserved	Doniger and Fay	467024	467031	1	-	.	Binding "PHD1 conserved 1051"
II	Conserved	Doniger and Fay	467085	467091	1	+	.	Binding "RGT1 conserved 1052"
II	Conserved	Doniger and Fay	476764	476769	1	-	.	Binding "AFT2 conserved 1053"
II	Conserved	Doniger and Fay	476765	476775	1	-	.	Binding "FHL1 conserved 1054"
II	Conserved	Doniger and Fay	476765	476774	1	-	.	Binding "RAP1 conserved 1055"
II	Conserved	Doniger and Fay	476766	476775	1	+	.	Binding "SFP1 conserved 1056"
II	Conserved	Doniger and Fay	476786	476791	1	-	.	Binding "SKO1 conserved 1057"
II	Conserved	Doniger and Fay	477228	477233	1	-	.	Binding "AFT2 conserved 1058"
II	Conserved	Doniger and Fay	477229	477239	1	-	.	Binding "FHL1 conserved 1059"
II	Conserved	Doniger and Fay	477229	477238	1	-	.	Binding "RAP1 conserved 1060"
II	Conserved	Doniger and Fay	477232	477240	1	-	.	Binding "MSN2 conserved 1061"
II	Semi-conserved	Doniger and Fay	477358	477370	1	-	.	Binding "HSF1 loss on Smik with turnover 181 bp away 1062"
II	Semi-conserved	Doniger and Fay	477416	477426	1	+	.	Binding "SPT2 loss on Smik with turnover -73 bp away 1063"
II	Conserved	Doniger and Fay	479417	479427	1	+	.	Binding "SPT2 conserved (Convergent, not counted) 1064"
II	Semi-conserved	Doniger and Fay	480990	481001	1	+	.	Binding "RLR1 loss on Smik 1065"
II	Conserved	Doniger and Fay	481039	481049	1	-	.	Binding "PDR1 conserved 1066"
II	Conserved	Doniger and Fay	481044	481052	1	-	.	Binding "MSN2 conserved 1067"
II	Conserved	Doniger and Fay	481045	481051	1	+	.	Binding "NRG1 conserved 1068"
II	Semi-conserved	Doniger and Fay	481341	481348	1	+	.	Binding "SPT23 loss on Smik with turnover -197 bp away 1069"
II	Semi-conserved	Doniger and Fay	483440	483447	1	+	.	Binding "SPT23 loss on Smik with turnover 10 bp away 1070"
II	Conserved	Doniger and Fay	483493	483498	1	+	.	Binding "YHP1 conserved 1071"
II	Semi-conserved	Doniger and Fay	483531	483541	1	+	.	Binding "SPT2 loss on Smik with turnover 332 bp away 1072"
II	Conserved	Doniger and Fay	483592	483603	1	+	.	Binding "RLR1 conserved 1073"
II	Conserved	Doniger and Fay	483631	483643	1	-	.	Binding "ABF1 conserved 1074"
II	Conserved	Doniger and Fay	488537	488544	1	+	.	Binding "FKH1 conserved 1075"
II	Conserved	Doniger and Fay	488590	488598	1	+	.	Binding "MET31 conserved 1076"
II	Conserved	Doniger and Fay	488801	488808	1	+	.	Binding "CIN5 conserved 1077"
II	Conserved	Doniger and Fay	490493	490499	1	+	.	Binding "RIM101 conserved 1078"
II	Conserved	Doniger and Fay	490556	490565	1	+	.	Binding "RLM1 conserved 1079"
II	Conserved	Doniger and Fay	490615	490623	1	+	.	Binding "SKN7 conserved 1080"
II	Conserved	Doniger and Fay	490617	490625	1	-	.	Binding "MSN2 conserved 1081"
II	Conserved	Doniger and Fay	490620	490625	1	-	.	Binding "ADR1 conserved 1082"
II	Conserved	Doniger and Fay	490648	490655	1	+	.	Binding "PHD1 conserved 1083"
II	Conserved	Doniger and Fay	490652	490657	1	+	.	Binding "ADR1 conserved 1084"
II	Conserved	Doniger and Fay	490656	490661	1	-	.	Binding "RTG3 conserved 1085"
II	Conserved	Doniger and Fay	490758	490763	1	-	.	Binding "SKO1 conserved 1086"
II	Conserved	Doniger and Fay	490973	490983	1	-	.	Binding "SPT2 conserved 1087"
II	Conserved	Doniger and Fay	491131	491138	1	+	.	Binding "CIN5 conserved 1088"
II	Conserved	Doniger and Fay	491197	491208	1	-	.	Binding "THI2 conserved 1089"
II	Conserved	Doniger and Fay	492872	492879	1	-	.	Binding "FKH1 conserved 1090"
II	Conserved	Doniger and Fay	492875	492883	1	-	.	Binding "ROX1 conserved 1091"
II	Conserved	Doniger and Fay	492914	492918	1	-	.	Binding "DAL80 conserved 1092"
II	Conserved	Doniger and Fay	492917	492925	1	-	.	Binding "GLN3 conserved 1093"
II	Conserved	Doniger and Fay	492919	492925	1	-	.	Binding "DAL82 conserved 1094"
II	Conserved	Doniger and Fay	492920	492926	1	-	.	Binding "GAT1 conserved 1095"
II	Conserved	Doniger and Fay	492920	492925	1	-	.	Binding "GZF3 conserved 1096"
II	Conserved	Doniger and Fay	492921	492925	1	-	.	Binding "DAL80 conserved 1097"
II	Conserved	Doniger and Fay	492955	492966	1	+	.	Binding "FKH2 conserved 1098"
II	Conserved	Doniger and Fay	492987	492993	1	-	.	Binding "REB1 conserved 1099"
II	Conserved	Doniger and Fay	493013	493021	1	+	.	Binding "ROX1 conserved 1100"
II	Conserved	Doniger and Fay	493024	493030	1	+	.	Binding "GCN4 conserved 1101"
II	Conserved	Doniger and Fay	493027	493032	1	+	.	Binding "ASH1 conserved 1102"
II	Conserved	Doniger and Fay	494271	494282	1	+	.	Binding "FKH2 conserved 1103"
II	Conserved	Doniger and Fay	495436	495441	1	-	.	Binding "SWI5 conserved 1104"
II	Conserved	Doniger and Fay	495463	495475	1	-	.	Binding "ABF1 conserved 1105"
II	Conserved	Doniger and Fay	497023	497029	1	+	.	Binding "REB1 conserved 1106"
II	Conserved	Doniger and Fay	501478	501483	1	+	.	Binding "ADR1 conserved 1107"
II	Conserved	Doniger and Fay	501488	501493	1	+	.	Binding "SWI5 conserved 1108"
II	Conserved	Doniger and Fay	501604	501611	1	-	.	Binding "CIN5 conserved 1109"
II	Conserved	Doniger and Fay	504288	504296	1	-	.	Binding "RCS1 conserved 1110"
II	Conserved	Doniger and Fay	504291	504297	1	+	.	Binding "NRG1 conserved 1111"
II	Conserved	Doniger and Fay	504539	504546	1	+	.	Binding "FKH1 conserved 1112"
II	Conserved	Doniger and Fay	504539	504550	1	-	.	Binding "FKH2 conserved 1113"
II	Conserved	Doniger and Fay	504659	504667	1	-	.	Binding "TYE7 conserved 1114"
II	Conserved	Doniger and Fay	504676	504684	1	+	.	Binding "TYE7 conserved 1115"
II	Conserved	Doniger and Fay	504689	504693	1	+	.	Binding "DAL80 conserved 1116"
II	Conserved	Doniger and Fay	504690	504700	1	-	.	Binding "SPT2 conserved 1117"
II	Conserved	Doniger and Fay	504790	504795	1	+	.	Binding "SWI5 conserved 1118"
II	Conserved	Doniger and Fay	505372	505378	1	-	.	Binding "DAL82 conserved 1119"
II	Conserved	Doniger and Fay	505373	505379	1	-	.	Binding "GAT1 conserved 1120"
II	Conserved	Doniger and Fay	505373	505378	1	-	.	Binding "GZF3 conserved 1121"
II	Conserved	Doniger and Fay	505374	505378	1	-	.	Binding "DAL80 conserved 1122"
II	Conserved	Doniger and Fay	505561	505567	1	-	.	Binding "REB1 conserved 1123"
II	Conserved	Doniger and Fay	505562	505571	1	+	.	Binding "UME6 conserved 1124"
II	Conserved	Doniger and Fay	505565	505574	1	+	.	Binding "UGA3 conserved 1125"
II	Conserved	Doniger and Fay	512834	512844	1	-	.	Binding "PDR1 conserved 1126"
II	Conserved	Doniger and Fay	512842	512851	1	+	.	Binding "STB5 conserved 1127"
II	Semi-conserved	Doniger and Fay	513593	513600	1	-	.	Binding "SPT23 loss on Scer(Convergent, not counted) 1128"
II	Conserved	Doniger and Fay	515471	515478	1	+	.	Binding "FKH1 conserved 1129"
II	Conserved	Doniger and Fay	515471	515482	1	-	.	Binding "FKH2 conserved 1130"
II	Conserved	Doniger and Fay	515486	515498	1	-	.	Binding "MCM1 conserved 1131"
II	Conserved	Doniger and Fay	515486	515498	1	-	.	Binding "NDD1 conserved 1132"
II	Conserved	Doniger and Fay	515491	515497	1	-	.	Binding "ARR1 conserved 1133"
II	Conserved	Doniger and Fay	515491	515497	1	-	.	Binding "YAP3 conserved 1134"
II	Conserved	Doniger and Fay	515519	515529	1	+	.	Binding "SNT2 conserved 1135"
II	Conserved	Doniger and Fay	515553	515561	1	-	.	Binding "GLN3 conserved 1136"
II	Conserved	Doniger and Fay	515557	515561	1	-	.	Binding "DAL80 conserved 1137"
II	Conserved	Doniger and Fay	527004	527013	1	+	.	Binding "SUT1 conserved 1138"
II	Conserved	Doniger and Fay	527004	527013	1	+	.	Binding "UGA3 conserved 1139"
II	Conserved	Doniger and Fay	527006	527014	1	-	.	Binding "SKN7 conserved 1140"
II	Conserved	Doniger and Fay	530675	530682	1	-	.	Binding "CIN5 conserved (Convergent, not counted) 1141"
II	Conserved	Doniger and Fay	530731	530740	1	+	.	Binding "RLM1 conserved (Convergent, not counted) 1142"
II	Conserved	Doniger and Fay	530740	530746	1	+	.	Binding "MAC1 conserved (Convergent, not counted) 1143"
II	Conserved	Doniger and Fay	530755	530765	1	+	.	Binding "SPT2 conserved (Convergent, not counted) 1144"
II	Conserved	Doniger and Fay	530784	530793	1	+	.	Binding "STB1 conserved (Convergent, not counted) 1145"
II	Conserved	Doniger and Fay	532369	532375	1	+	.	Binding "REB1 conserved 1146"
II	Conserved	Doniger and Fay	532382	532392	1	+	.	Binding "SNT2 conserved 1147"
II	Conserved	Doniger and Fay	532791	532798	1	-	.	Binding "SPT23 conserved 1148"
II	Conserved	Doniger and Fay	533491	533498	1	-	.	Binding "PHD1 conserved 1149"
II	Conserved	Doniger and Fay	533529	533535	1	-	.	Binding "GCN4 conserved 1150"
II	Conserved	Doniger and Fay	533530	533535	1	-	.	Binding "BAS1 conserved 1151"
II	Conserved	Doniger and Fay	533531	533536	1	-	.	Binding "ASH1 conserved 1152"
II	Conserved	Doniger and Fay	533571	533579	1	-	.	Binding "TYE7 conserved 1153"
II	Conserved	Doniger and Fay	535077	535089	1	-	.	Binding "ABF1 conserved 1154"
II	Conserved	Doniger and Fay	536330	536338	1	+	.	Binding "MSN2 conserved 1155"
II	Semi-conserved	Doniger and Fay	536429	536435	1	-	.	Binding "GCN4 loss on Smik with turnover -13 bp away 1156"
II	Semi-conserved	Doniger and Fay	536430	536435	1	-	.	Binding "BAS1 loss on Smik with turnover -13 bp away 1157"
II	Conserved	Doniger and Fay	537606	537616	1	-	.	Binding "SUM1 conserved 1158"
II	Conserved	Doniger and Fay	537608	537613	1	+	.	Binding "SWI5 conserved 1159"
II	Conserved	Doniger and Fay	537617	537627	1	+	.	Binding "SUM1 conserved 1160"
II	Conserved	Doniger and Fay	544583	544588	1	+	.	Binding "SWI5 conserved 1161"
II	Conserved	Doniger and Fay	544611	544621	1	-	.	Binding "PDR1 conserved 1162"
II	Conserved	Doniger and Fay	544619	544625	1	+	.	Binding "RGT1 conserved 1163"
II	Conserved	Doniger and Fay	544770	544780	1	+	.	Binding "HAP1 conserved 1164"
II	Conserved	Doniger and Fay	546192	546203	1	-	.	Binding "FKH2 conserved 1165"
II	Conserved	Doniger and Fay	548297	548302	1	+	.	Binding "YHP1 conserved (Convergent, not counted) 1166"
II	Conserved	Doniger and Fay	549077	549081	1	-	.	Binding "HAP2 conserved 1167"
II	Conserved	Doniger and Fay	549131	549141	1	-	.	Binding "SUM1 conserved 1168"
II	Conserved	Doniger and Fay	549195	549202	1	+	.	Binding "SWI6 conserved 1169"
II	Conserved	Doniger and Fay	554433	554443	1	+	.	Binding "SPT2 conserved 1170"
II	Conserved	Doniger and Fay	554604	554609	1	+	.	Binding "MOT3 conserved 1171"
II	Conserved	Doniger and Fay	554710	554721	1	+	.	Binding "SIG1 conserved 1172"
II	Conserved	Doniger and Fay	554831	554836	1	+	.	Binding "SWI5 conserved 1173"
II	Conserved	Doniger and Fay	555133	555142	1	+	.	Binding "STB5 conserved 1174"
II	Conserved	Doniger and Fay	555355	555360	1	-	.	Binding "SWI5 conserved 1175"
II	Conserved	Doniger and Fay	555667	555672	1	-	.	Binding "SKO1 conserved 1176"
II	Conserved	Doniger and Fay	555840	555845	1	+	.	Binding "SWI5 conserved 1177"
II	Conserved	Doniger and Fay	555842	555848	1	-	.	Binding "RIM101 conserved 1178"
II	Conserved	Doniger and Fay	555908	555919	1	+	.	Binding "FKH2 conserved 1179"
II	Conserved	Doniger and Fay	555912	555919	1	-	.	Binding "FKH1 conserved 1180"
II	Conserved	Doniger and Fay	555948	555960	1	+	.	Binding "MCM1 conserved 1181"
II	Conserved	Doniger and Fay	555948	555960	1	+	.	Binding "NDD1 conserved 1182"
II	Conserved	Doniger and Fay	555972	555977	1	+	.	Binding "YHP1 conserved 1183"
II	Conserved	Doniger and Fay	556029	556035	1	-	.	Binding "DIG1 conserved 1184"
II	Conserved	Doniger and Fay	556029	556035	1	-	.	Binding "STE12 conserved 1185"
II	Conserved	Doniger and Fay	556051	556062	1	+	.	Binding "SIG1 conserved 1186"
II	Conserved	Doniger and Fay	556052	556058	1	+	.	Binding "GCN4 conserved 1187"
II	Conserved	Doniger and Fay	556073	556080	1	+	.	Binding "PHD1 conserved 1188"
II	Conserved	Doniger and Fay	556075	556081	1	+	.	Binding "ACE2 conserved 1189"
II	Conserved	Doniger and Fay	556075	556080	1	+	.	Binding "SWI5 conserved 1190"
II	Conserved	Doniger and Fay	556136	556142	1	-	.	Binding "TEC1 conserved 1191"
II	Conserved	Doniger and Fay	556149	556155	1	-	.	Binding "DIG1 conserved 1192"
II	Conserved	Doniger and Fay	556149	556155	1	-	.	Binding "STE12 conserved 1193"
II	Conserved	Doniger and Fay	556236	556242	1	-	.	Binding "NRG1 conserved 1194"
II	Conserved	Doniger and Fay	556237	556242	1	+	.	Binding "AFT2 conserved 1195"
II	Conserved	Doniger and Fay	556454	556464	1	-	.	Binding "FHL1 conserved 1196"
II	Conserved	Doniger and Fay	556455	556464	1	+	.	Binding "SFP1 conserved 1197"
II	Conserved	Doniger and Fay	556462	556468	1	-	.	Binding "TEC1 conserved 1198"
II	Conserved	Doniger and Fay	558262	558266	1	+	.	Binding "DAL80 conserved 1199"
II	Conserved	Doniger and Fay	559857	559866	1	+	.	Binding "STB1 conserved 1200"
II	Conserved	Doniger and Fay	559858	559866	1	+	.	Binding "SWI4 conserved 1201"
II	Conserved	Doniger and Fay	560998	560997	1	+	.	Binding "INO2 conserved 1202"
II	Conserved	Doniger and Fay	561100	561112	1	+	.	Binding "ABF1 conserved 1203"
II	Conserved	Doniger and Fay	561153	561161	1	+	.	Binding "MSN2 conserved 1204"
II	Semi-conserved	Doniger and Fay	561180	561185	1	-	.	Binding "SKO1 loss on Spar with turnover -41 bp away 1205"
II	Conserved	Doniger and Fay	563055	563063	1	+	.	Binding "ROX1 conserved (Convergent, not counted) 1206"
II	Conserved	Doniger and Fay	564655	564660	1	-	.	Binding "BAS1 conserved 1207"
II	Conserved	Doniger and Fay	564661	564667	1	-	.	Binding "XBP1 conserved 1208"
II	Conserved	Doniger and Fay	564755	564761	1	+	.	Binding "GAT1 conserved 1209"
II	Conserved	Doniger and Fay	564756	564760	1	+	.	Binding "DAL80 conserved 1210"
II	Conserved	Doniger and Fay	564756	564762	1	+	.	Binding "DAL82 conserved 1211"
II	Conserved	Doniger and Fay	564756	564764	1	+	.	Binding "GLN3 conserved 1212"
II	Conserved	Doniger and Fay	564756	564761	1	+	.	Binding "GZF3 conserved 1213"
II	Conserved	Doniger and Fay	564843	564849	1	+	.	Binding "DIG1 conserved 1214"
II	Conserved	Doniger and Fay	564843	564849	1	+	.	Binding "STE12 conserved 1215"
II	Conserved	Doniger and Fay	564876	564882	1	+	.	Binding "RIM101 conserved 1216"
II	Conserved	Doniger and Fay	564940	564950	1	+	.	Binding "SPT2 conserved 1217"
II	Conserved	Doniger and Fay	564984	564995	1	+	.	Binding "FKH2 conserved 1218"
II	Conserved	Doniger and Fay	564988	564995	1	-	.	Binding "FKH1 conserved 1219"
II	Conserved	Doniger and Fay	564997	565003	1	-	.	Binding "ACE2 conserved 1220"
II	Conserved	Doniger and Fay	565007	565016	1	+	.	Binding "STB1 conserved 1221"
II	Conserved	Doniger and Fay	565033	565042	1	+	.	Binding "STB1 conserved 1222"
II	Conserved	Doniger and Fay	565034	565040	1	+	.	Binding "MBP1 conserved 1223"
II	Conserved	Doniger and Fay	565034	565042	1	+	.	Binding "SWI4 conserved 1224"
II	Conserved	Doniger and Fay	565035	565042	1	-	.	Binding "SWI6 conserved 1225"
II	Conserved	Doniger and Fay	565070	565082	1	-	.	Binding "ABF1 conserved 1226"
II	Conserved	Doniger and Fay	565085	565097	1	-	.	Binding "ABF1 conserved 1227"
II	Conserved	Doniger and Fay	565469	565480	1	+	.	Binding "FKH2 conserved 1228"
II	Conserved	Doniger and Fay	565473	565480	1	-	.	Binding "FKH1 conserved 1229"
II	Conserved	Doniger and Fay	565520	565526	1	-	.	Binding "REB1 conserved 1230"
II	Conserved	Doniger and Fay	567789	567794	1	-	.	Binding "YHP1 conserved (Convergent, not counted) 1231"
II	Conserved	Doniger and Fay	568646	568652	1	-	.	Binding "REB1 conserved 1232"
II	Conserved	Doniger and Fay	569772	569779	1	-	.	Binding "CIN5 conserved (Convergent, not counted) 1233"
II	Conserved	Doniger and Fay	571317	571328	1	+	.	Binding "SIG1 conserved 1234"
II	Conserved	Doniger and Fay	572006	572017	1	-	.	Binding "RLR1 conserved 1235"
II	Conserved	Doniger and Fay	572183	572192	1	-	.	Binding "STB5 conserved 1236"
II	Conserved	Doniger and Fay	572184	572188	1	-	.	Binding "DAL80 conserved 1237"
II	Conserved	Doniger and Fay	573788	573792	1	-	.	Binding "DAL80 conserved (Convergent, not counted) 1238"
II	Conserved	Doniger and Fay	576081	576088	1	+	.	Binding "CIN5 conserved 1239"
II	Conserved	Doniger and Fay	576192	576204	1	-	.	Binding "ABF1 conserved 1240"
II	Conserved	Doniger and Fay	576216	576228	1	-	.	Binding "HSF1 conserved 1241"
II	Conserved	Doniger and Fay	576221	576233	1	+	.	Binding "HSF1 conserved 1242"
II	Conserved	Doniger and Fay	578149	578157	1	+	.	Binding "RPN4 conserved 1243"
II	Conserved	Doniger and Fay	578210	578216	1	-	.	Binding "REB1 conserved 1244"
II	Conserved	Doniger and Fay	578236	578242	1	-	.	Binding "ARR1 conserved 1245"
II	Conserved	Doniger and Fay	578236	578242	1	-	.	Binding "YAP3 conserved 1246"
II	Conserved	Doniger and Fay	578247	578258	1	-	.	Binding "THI2 conserved 1247"
II	Conserved	Doniger and Fay	579049	579060	1	+	.	Binding "RLR1 conserved (Convergent, not counted) 1248"
II	Conserved	Doniger and Fay	579050	579054	1	-	.	Binding "DAL80 conserved (Convergent, not counted) 1249"
II	Conserved	Doniger and Fay	581440	581446	1	+	.	Binding "REB1 conserved 1250"
II	Conserved	Doniger and Fay	581444	581449	1	+	.	Binding "YHP1 conserved 1251"
II	Semi-conserved	Doniger and Fay	581466	581475	1	+	.	Binding "RLM1 loss on Smik 1252"
II	Conserved	Doniger and Fay	581514	581522	1	-	.	Binding "GLN3 conserved 1253"
II	Conserved	Doniger and Fay	581516	581522	1	-	.	Binding "DAL82 conserved 1254"
II	Conserved	Doniger and Fay	582266	582270	1	+	.	Binding "DAL80 conserved 1255"
II	Conserved	Doniger and Fay	582272	582280	1	+	.	Binding "RPN4 conserved 1256"
II	Conserved	Doniger and Fay	582287	582293	1	-	.	Binding "REB1 conserved 1257"
II	Semi-conserved	Doniger and Fay	584764	584774	1	-	.	Binding "SPT2 loss on Spar(Convergent, not counted) 1258"
II	Conserved	Doniger and Fay	584774	584780	1	+	.	Binding "TEC1 conserved (Convergent, not counted) 1259"
II	Conserved	Doniger and Fay	586311	586310	1	+	.	Binding "INO2 conserved 1260"
II	Conserved	Doniger and Fay	586344	586353	1	+	.	Binding "LEU3 conserved 1261"
II	Conserved	Doniger and Fay	586417	586423	1	-	.	Binding "NRG1 conserved 1262"
II	Conserved	Doniger and Fay	589289	589295	1	-	.	Binding "REB1 conserved 1263"
II	Conserved	Doniger and Fay	589352	589362	1	-	.	Binding "SNT2 conserved 1264"
II	Semi-conserved	Doniger and Fay	589366	589375	1	+	.	Binding "CAD1 loss on Smik with turnover 311 bp away 1265"
II	Semi-conserved	Doniger and Fay	589367	589373	1	-	.	Binding "ARR1 loss on Smik with turnover 297 bp away 1266"
II	Semi-conserved	Doniger and Fay	589367	589373	1	-	.	Binding "YAP3 loss on Smik with turnover 297 bp away 1267"
II	Conserved	Doniger and Fay	589564	589574	1	-	.	Binding "FHL1 conserved 1268"
II	Conserved	Doniger and Fay	589564	589573	1	-	.	Binding "RAP1 conserved 1269"
II	Conserved	Doniger and Fay	589570	589581	1	-	.	Binding "HAC1 conserved 1270"
II	Conserved	Doniger and Fay	589593	589603	1	+	.	Binding "SUM1 conserved 1271"
II	Conserved	Doniger and Fay	589594	589603	1	+	.	Binding "NDT80 conserved 1272"
II	Conserved	Doniger and Fay	592706	592716	1	+	.	Binding "FHL1 conserved 1273"
II	Conserved	Doniger and Fay	592706	592715	1	-	.	Binding "SFP1 conserved 1274"
II	Conserved	Doniger and Fay	592723	592733	1	+	.	Binding "FHL1 conserved 1275"
II	Conserved	Doniger and Fay	592723	592732	1	-	.	Binding "SFP1 conserved 1276"
II	Conserved	Doniger and Fay	592724	592733	1	+	.	Binding "RAP1 conserved 1277"
II	Semi-conserved	Doniger and Fay	595068	595074	1	+	.	Binding "DAL82 loss on Smik with turnover -74 bp away 1278"
II	Semi-conserved	Doniger and Fay	595068	595073	1	+	.	Binding "GZF3 loss on Smik with turnover -74 bp away 1279"
II	Semi-conserved	Doniger and Fay	595085	595096	1	-	.	Binding "SIG1 loss on Smik with turnover 794 bp away 1280"
II	Conserved	Doniger and Fay	595114	595120	1	+	.	Binding "REB1 conserved 1281"
II	Conserved	Doniger and Fay	595116	595125	1	+	.	Binding "RAP1 conserved 1282"
II	Conserved	Doniger and Fay	595139	595145	1	+	.	Binding "RIM101 conserved 1283"
II	Conserved	Doniger and Fay	595149	595153	1	+	.	Binding "HAP2 conserved 1284"
II	Conserved	Doniger and Fay	595150	595155	1	-	.	Binding "YHP1 conserved 1285"
II	Conserved	Doniger and Fay	595203	595212	1	+	.	Binding "RLM1 conserved 1286"
II	Conserved	Doniger and Fay	595260	595269	1	+	.	Binding "CAD1 conserved 1287"
II	Conserved	Doniger and Fay	595261	595269	1	+	.	Binding "YAP1 conserved 1288"
II	Conserved	Doniger and Fay	595274	595286	1	+	.	Binding "ABF1 conserved 1289"
II	Conserved	Doniger and Fay	595312	595319	1	+	.	Binding "CIN5 conserved 1290"
II	Conserved	Doniger and Fay	595675	595685	1	-	.	Binding "PDR1 conserved 1291"
II	Conserved	Doniger and Fay	595679	595686	1	+	.	Binding "RDS1 conserved 1292"
II	Conserved	Doniger and Fay	595679	595688	1	+	.	Binding "SUT1 conserved 1293"
II	Semi-conserved	Doniger and Fay	595746	595754	1	-	.	Binding "MSN2 loss on Smik 1294"
II	Conserved	Doniger and Fay	595781	595785	1	-	.	Binding "DAL80 conserved 1295"
II	Conserved	Doniger and Fay	595783	595797	1	-	.	Binding "MET4 conserved 1296"
II	Semi-conserved	Doniger and Fay	595837	595845	1	-	.	Binding "MSN2 loss on Smik 1297"
II	Conserved	Doniger and Fay	595952	595956	1	-	.	Binding "DAL80 conserved 1298"
II	Conserved	Doniger and Fay	597283	597294	1	+	.	Binding "FKH2 conserved 1299"
II	Conserved	Doniger and Fay	597287	597294	1	-	.	Binding "FKH1 conserved 1300"
II	Conserved	Doniger and Fay	599071	599080	1	+	.	Binding "RLM1 conserved (Convergent, not counted) 1301"
II	Conserved	Doniger and Fay	603545	603554	1	+	.	Binding "RLM1 conserved (Convergent, not counted) 1302"
II	Conserved	Doniger and Fay	603549	603559	1	-	.	Binding "SPT2 conserved (Convergent, not counted) 1303"
II	Conserved	Doniger and Fay	608880	608892	1	-	.	Binding "HSF1 conserved (Convergent, not counted) 1304"
II	Conserved	Doniger and Fay	608973	608984	1	+	.	Binding "RLR1 conserved (Convergent, not counted) 1305"
II	Conserved	Doniger and Fay	611943	611951	1	+	.	Binding "GLN3 conserved 1306"
II	Semi-conserved	Doniger and Fay	611996	612004	1	-	.	Binding "SWI4 loss on Smik 1307"
II	Conserved	Doniger and Fay	611998	612005	1	-	.	Binding "SWI6 conserved 1308"
II	Conserved	Doniger and Fay	612000	612010	1	+	.	Binding "SUM1 conserved 1309"
II	Conserved	Doniger and Fay	612001	612010	1	+	.	Binding "NDT80 conserved 1310"
II	Conserved	Doniger and Fay	612020	612029	1	+	.	Binding "STB1 conserved 1311"
II	Conserved	Doniger and Fay	612021	612029	1	+	.	Binding "SWI4 conserved 1312"
II	Conserved	Doniger and Fay	612106	612113	1	+	.	Binding "CIN5 conserved 1313"
II	Semi-conserved	Doniger and Fay	616010	616019	1	+	.	Binding "UME6 loss on Smik 1314"
II	Conserved	Doniger and Fay	616034	616044	1	+	.	Binding "SUM1 conserved 1315"
II	Conserved	Doniger and Fay	616035	616044	1	+	.	Binding "NDT80 conserved 1316"
II	Conserved	Doniger and Fay	618592	618597	1	-	.	Binding "MOT3 conserved 1317"
II	Conserved	Doniger and Fay	618642	618648	1	+	.	Binding "STE12 conserved 1318"
II	Conserved	Doniger and Fay	618678	618690	1	-	.	Binding "ABF1 conserved 1319"
II	Conserved	Doniger and Fay	620385	620395	1	-	.	Binding "SPT2 conserved 1320"
II	Conserved	Doniger and Fay	620646	620652	1	-	.	Binding "TEC1 conserved 1321"
II	Conserved	Doniger and Fay	620682	620688	1	-	.	Binding "REB1 conserved 1322"
II	Conserved	Doniger and Fay	622676	622685	1	+	.	Binding "CAD1 conserved 1323"
II	Conserved	Doniger and Fay	624431	624441	1	+	.	Binding "PDR1 conserved 1324"
II	Conserved	Doniger and Fay	624514	624520	1	+	.	Binding "MAC1 conserved 1325"
II	Semi-conserved	Doniger and Fay	624563	624575	1	-	.	Binding "CSRE loss on Smik 1326"
II	Conserved	Doniger and Fay	624602	624613	1	+	.	Binding "SIG1 conserved 1327"
II	Conserved	Doniger and Fay	624856	624863	1	-	.	Binding "CIN5 conserved 1328"
II	Conserved	Doniger and Fay	624884	624895	1	-	.	Binding "SIG1 conserved 1329"
II	Conserved	Doniger and Fay	624889	624901	1	-	.	Binding "RFX1 conserved 1330"
II	Conserved	Doniger and Fay	625024	625031	1	-	.	Binding "RDS1 conserved 1331"
II	Semi-conserved	Doniger and Fay	625034	625043	1	+	.	Binding "NDT80 loss on Scer with turnover -648 bp away 1332"
II	Conserved	Doniger and Fay	625137	625144	1	+	.	Binding "FKH1 conserved 1333"
II	Conserved	Doniger and Fay	625137	625148	1	-	.	Binding "FKH2 conserved 1334"
II	Conserved	Doniger and Fay	625495	625503	1	-	.	Binding "SWI4 conserved 1335"
II	Conserved	Doniger and Fay	625554	625566	1	+	.	Binding "NDD1 conserved 1336"
II	Conserved	Doniger and Fay	625557	625569	1	-	.	Binding "MCM1 conserved 1337"
II	Semi-conserved	Doniger and Fay	625560	625571	1	-	.	Binding "RLR1 loss on Smik with turnover 126 bp away 1338"
II	Conserved	Doniger and Fay	628568	628574	1	+	.	Binding "RGT1 conserved 1339"
II	Semi-conserved	Doniger and Fay	628651	628663	1	+	.	Binding "CSRE loss on Smik with turnover 190 bp away 1340"
II	Conserved	Doniger and Fay	628655	628660	1	-	.	Binding "SWI5 conserved 1341"
II	Conserved	Doniger and Fay	628656	628664	1	-	.	Binding "MSN2 conserved 1342"
II	Conserved	Doniger and Fay	628746	628752	1	-	.	Binding "RGT1 conserved 1343"
II	Semi-conserved	Doniger and Fay	628764	628771	1	-	.	Binding "PHD1 loss on Smik 1344"
II	Conserved	Doniger and Fay	628779	628787	1	-	.	Binding "GLN3 conserved 1345"
II	Conserved	Doniger and Fay	628783	628787	1	-	.	Binding "DAL80 conserved 1346"
II	Conserved	Doniger and Fay	628824	628835	1	+	.	Binding "RLR1 conserved 1347"
II	Conserved	Doniger and Fay	628848	628853	1	+	.	Binding "MOT3 conserved 1348"
II	Conserved	Doniger and Fay	629077	629086	1	+	.	Binding "SUT1 conserved 1349"
II	Conserved	Doniger and Fay	629081	629086	1	+	.	Binding "ADR1 conserved 1350"
II	Semi-conserved	Doniger and Fay	632001	632012	1	+	.	Binding "RLR1 loss on Smik with turnover -25 bp away (Convergent, not counted) 1351"
II	Conserved	Doniger and Fay	633500	633507	1	+	.	Binding "SWI6 conserved 1352"
II	Conserved	Doniger and Fay	633513	633519	1	+	.	Binding "STE12 conserved 1353"
II	Conserved	Doniger and Fay	633514	633525	1	+	.	Binding "THI2 conserved 1354"
II	Conserved	Doniger and Fay	634963	634968	1	+	.	Binding "AFT2 conserved 1355"
II	Semi-conserved	Doniger and Fay	647160	647165	1	-	.	Binding "ASH1 loss on Smik with turnover 152 bp away 1356"
II	Conserved	Doniger and Fay	647365	647373	1	+	.	Binding "MSN2 conserved 1357"
II	Conserved	Doniger and Fay	647370	647380	1	-	.	Binding "HAP1 conserved 1358"
II	Semi-conserved	Doniger and Fay	647672	647678	1	+	.	Binding "OPI1 loss on Smik 1359"
II	Conserved	Doniger and Fay	650020	650028	1	-	.	Binding "GLN3 conserved 1360"
II	Conserved	Doniger and Fay	650022	650028	1	-	.	Binding "DAL82 conserved 1361"
II	Conserved	Doniger and Fay	650089	650100	1	-	.	Binding "THI2 conserved 1362"
II	Conserved	Doniger and Fay	650140	650151	1	+	.	Binding "SIG1 conserved 1363"
II	Conserved	Doniger and Fay	650153	650159	1	+	.	Binding "CBF1 conserved 1364"
II	Conserved	Doniger and Fay	650153	650161	1	+	.	Binding "TYE7 conserved 1365"
II	Conserved	Doniger and Fay	650154	650160	1	+	.	Binding "PHO4 conserved 1366"
II	Conserved	Doniger and Fay	651195	651203	1	+	.	Binding "GCR1 conserved 1367"
II	Conserved	Doniger and Fay	651211	651219	1	-	.	Binding "SKN7 conserved 1368"
II	Conserved	Doniger and Fay	651223	651231	1	+	.	Binding "ROX1 conserved 1369"
II	Conserved	Doniger and Fay	651273	651281	1	+	.	Binding "MSN2 conserved 1370"
II	Conserved	Doniger and Fay	651363	651374	1	+	.	Binding "FKH2 conserved 1371"
II	Conserved	Doniger and Fay	658631	658635	1	+	.	Binding "DAL80 conserved (Convergent, not counted) 1372"
II	Conserved	Doniger and Fay	666331	666336	1	+	.	Binding "ADR1 conserved 1373"
II	Conserved	Doniger and Fay	666497	666503	1	+	.	Binding "RGT1 conserved 1374"
II	Conserved	Doniger and Fay	666516	666521	1	+	.	Binding "BAS1 conserved 1375"
II	Conserved	Doniger and Fay	666555	666561	1	+	.	Binding "RGT1 conserved 1376"
II	Conserved	Doniger and Fay	666607	666611	1	+	.	Binding "DAL80 conserved 1377"
II	Conserved	Doniger and Fay	668534	668542	1	+	.	Binding "STB4 conserved 1378"
II	Conserved	Doniger and Fay	670404	670411	1	+	.	Binding "RDS1 conserved 1379"
II	Conserved	Doniger and Fay	670404	670413	1	+	.	Binding "SUT1 conserved 1380"
II	Conserved	Doniger and Fay	670458	670464	1	+	.	Binding "DIG1 conserved 1381"
II	Conserved	Doniger and Fay	670458	670464	1	+	.	Binding "STE12 conserved 1382"
II	Conserved	Doniger and Fay	670481	670487	1	+	.	Binding "DIG1 conserved 1383"
II	Semi-conserved	Doniger and Fay	673460	673467	1	-	.	Binding "SPT23 loss on Smik(Convergent, not counted) 1384"
II	Conserved	Doniger and Fay	673513	673524	1	+	.	Binding "RLR1 conserved (Convergent, not counted) 1385"
II	Conserved	Doniger and Fay	690279	690291	1	+	.	Binding "CSRE conserved (Convergent, not counted) 1386"
II	Conserved	Doniger and Fay	690294	690301	1	+	.	Binding "FKH1 conserved (Convergent, not counted) 1387"
II	Conserved	Doniger and Fay	690298	690304	1	+	.	Binding "ARR1 conserved (Convergent, not counted) 1388"
II	Conserved	Doniger and Fay	690298	690304	1	+	.	Binding "YAP3 conserved (Convergent, not counted) 1389"
II	Conserved	Doniger and Fay	691821	691827	1	-	.	Binding "REB1 conserved 1390"
II	Semi-conserved	Doniger and Fay	697505	697510	1	+	.	Binding "ASH1 loss on Smik 1391"
II	Conserved	Doniger and Fay	697513	697519	1	+	.	Binding "XBP1 conserved 1392"
II	Conserved	Doniger and Fay	697525	697531	1	-	.	Binding "RIM101 conserved 1393"
II	Conserved	Doniger and Fay	697559	697570	1	+	.	Binding "RLR1 conserved 1394"
II	Conserved	Doniger and Fay	697695	697700	1	+	.	Binding "MOT3 conserved 1395"
II	Conserved	Doniger and Fay	697738	697743	1	-	.	Binding "MOT3 conserved 1396"
II	Conserved	Doniger and Fay	697890	697897	1	+	.	Binding "CIN5 conserved 1397"
II	Conserved	Doniger and Fay	697962	697968	1	+	.	Binding "STE12 conserved 1398"
II	Semi-conserved	Doniger and Fay	698044	698050	1	+	.	Binding "MAC1 loss on Smik with turnover -279 bp away 1399"
II	Conserved	Doniger and Fay	701866	701875	1	+	.	Binding "RLM1 conserved 1400"
II	Conserved	Doniger and Fay	702081	702087	1	-	.	Binding "GCN4 conserved 1401"
II	Conserved	Doniger and Fay	702082	702087	1	-	.	Binding "BAS1 conserved 1402"
II	Conserved	Doniger and Fay	702083	702088	1	-	.	Binding "ASH1 conserved 1403"
II	Conserved	Doniger and Fay	702238	702248	1	-	.	Binding "PDR1 conserved 1404"
II	Conserved	Doniger and Fay	702251	702261	1	+	.	Binding "PDR1 conserved 1405"
II	Conserved	Doniger and Fay	702291	702295	1	-	.	Binding "HAP2 conserved 1406"
II	Conserved	Doniger and Fay	702360	702368	1	-	.	Binding "SKN7 conserved 1407"
II	Conserved	Doniger and Fay	704204	704214	1	-	.	Binding "FHL1 conserved 1408"
II	Conserved	Doniger and Fay	704204	704213	1	-	.	Binding "RAP1 conserved 1409"
II	Conserved	Doniger and Fay	704205	704214	1	+	.	Binding "SFP1 conserved 1410"
II	Conserved	Doniger and Fay	704343	704352	1	+	.	Binding "RLM1 conserved 1411"
II	Conserved	Doniger and Fay	704418	704429	1	+	.	Binding "RLR1 conserved 1412"
II	Conserved	Doniger and Fay	704495	704499	1	-	.	Binding "DAL80 conserved 1413"
II	Semi-conserved	Doniger and Fay	714731	714738	1	-	.	Binding "SPT23 loss on Scer with turnover -166 bp away 1414"
II	Conserved	Doniger and Fay	716598	716603	1	+	.	Binding "ASH1 conserved 1415"
II	Conserved	Doniger and Fay	716599	716604	1	+	.	Binding "BAS1 conserved 1416"
II	Conserved	Doniger and Fay	716599	716605	1	+	.	Binding "GCN4 conserved 1417"
II	Conserved	Doniger and Fay	716620	716627	1	-	.	Binding "SPT23 conserved 1418"
II	Conserved	Doniger and Fay	716685	716690	1	+	.	Binding "BAS1 conserved 1419"
II	Conserved	Doniger and Fay	716685	716691	1	+	.	Binding "GCN4 conserved 1420"
II	Conserved	Doniger and Fay	716787	716793	1	-	.	Binding "YAP3 conserved 1421"
II	Conserved	Doniger and Fay	716807	716812	1	-	.	Binding "YHP1 conserved 1422"
II	Conserved	Doniger and Fay	716813	716822	1	-	.	Binding "STB5 conserved 1423"
II	Conserved	Doniger and Fay	716842	716848	1	+	.	Binding "TEC1 conserved 1424"
II	Conserved	Doniger and Fay	717990	718002	1	+	.	Binding "HSF1 conserved 1425"
II	Conserved	Doniger and Fay	717995	718005	1	-	.	Binding "SPT2 conserved 1426"
II	Conserved	Doniger and Fay	718270	718276	1	+	.	Binding "MAC1 conserved 1427"
II	Conserved	Doniger and Fay	718295	718301	1	-	.	Binding "GCN4 conserved 1428"
II	Conserved	Doniger and Fay	718296	718301	1	-	.	Binding "BAS1 conserved 1429"
II	Conserved	Doniger and Fay	718328	718333	1	+	.	Binding "AFT2 conserved 1430"
II	Conserved	Doniger and Fay	718328	718336	1	+	.	Binding "RCS1 conserved 1431"
II	Conserved	Doniger and Fay	718332	718339	1	+	.	Binding "PHD1 conserved 1432"
II	Conserved	Doniger and Fay	718345	718351	1	-	.	Binding "PHO4 conserved 1433"
II	Conserved	Doniger and Fay	718469	718473	1	+	.	Binding "HAP2 conserved 1434"
II	Conserved	Doniger and Fay	718533	718541	1	-	.	Binding "TYE7 conserved 1435"
II	Conserved	Doniger and Fay	718534	718540	1	+	.	Binding "CBF1 conserved 1436"
II	Conserved	Doniger and Fay	718848	718857	1	-	.	Binding "NDT80 conserved 1437"
II	Conserved	Doniger and Fay	718851	718857	1	-	.	Binding "GCN4 conserved 1438"
II	Conserved	Doniger and Fay	718852	718862	1	+	.	Binding "SUM1 conserved 1439"
II	Conserved	Doniger and Fay	718853	718862	1	+	.	Binding "NDT80 conserved 1440"
II	Conserved	Doniger and Fay	718889	718898	1	-	.	Binding "UME6 conserved 1441"
II	Conserved	Doniger and Fay	721281	721287	1	+	.	Binding "RIM101 conserved 1442"
II	Conserved	Doniger and Fay	722521	722528	1	+	.	Binding "SWI6 conserved 1443"
II	Conserved	Doniger and Fay	723110	723115	1	-	.	Binding "RTG3 conserved 1444"
II	Conserved	Doniger and Fay	723111	723117	1	-	.	Binding "REB1 conserved 1445"
II	Conserved	Doniger and Fay	726549	726558	1	+	.	Binding "RLM1 conserved (Convergent, not counted) 1446"
II	Conserved	Doniger and Fay	728269	728278	1	-	.	Binding "UME6 conserved 1447"
II	Conserved	Doniger and Fay	728739	728745	1	-	.	Binding "REB1 conserved 1448"
II	Semi-conserved	Doniger and Fay	732531	732541	1	+	.	Binding "SPT2 loss on Smik(Convergent, not counted) 1449"
II	Conserved	Doniger and Fay	734760	734769	1	+	.	Binding "NDT80 conserved 1450"
II	Conserved	Doniger and Fay	735630	735640	1	+	.	Binding "SPT2 conserved 1451"
II	Conserved	Doniger and Fay	735668	735678	1	-	.	Binding "SPT2 conserved 1452"
II	Semi-conserved	Doniger and Fay	739639	739650	1	+	.	Binding "SIG1 loss on Scer 1453"
II	Conserved	Doniger and Fay	739740	739748	1	-	.	Binding "TYE7 conserved 1454"
II	Semi-conserved	Doniger and Fay	744482	744489	1	-	.	Binding "SPT23 loss on Smik with turnover 161 bp away 1455"
II	Conserved	Doniger and Fay	744725	744729	1	+	.	Binding "HAP2 conserved 1456"
II	Conserved	Doniger and Fay	744748	744757	1	-	.	Binding "STB1 conserved 1457"
II	Conserved	Doniger and Fay	744748	744756	1	-	.	Binding "SWI4 conserved 1458"
II	Conserved	Doniger and Fay	744748	744755	1	+	.	Binding "SWI6 conserved 1459"
II	Conserved	Doniger and Fay	744750	744756	1	-	.	Binding "MBP1 conserved 1460"
II	Conserved	Doniger and Fay	744754	744762	1	+	.	Binding "GLN3 conserved 1461"
II	Conserved	Doniger and Fay	747962	747969	1	-	.	Binding "FKH1 conserved 1462"
II	Semi-conserved	Doniger and Fay	747972	747978	1	+	.	Binding "YAP3 loss on Scer 1463"
II	Semi-conserved	Doniger and Fay	760064	760072	1	-	.	Binding "MSN2 loss on Smik 1464"
II	Semi-conserved	Doniger and Fay	760121	760132	1	+	.	Binding "RLR1 loss on Smik 1465"
II	Conserved	Doniger and Fay	760212	760218	1	+	.	Binding "MBP1 conserved 1466"
II	Conserved	Doniger and Fay	761085	761097	1	+	.	Binding "ABF1 conserved 1467"
II	Conserved	Doniger and Fay	764741	764749	1	+	.	Binding "MSN2 conserved 1468"
II	Conserved	Doniger and Fay	764800	764808	1	+	.	Binding "SKN7 conserved 1469"
II	Conserved	Doniger and Fay	764811	764818	1	-	.	Binding "RDS1 conserved 1470"
II	Conserved	Doniger and Fay	767718	767726	1	-	.	Binding "MET31 conserved 1471"
II	Conserved	Doniger and Fay	767726	767735	1	-	.	Binding "STB1 conserved 1472"
II	Conserved	Doniger and Fay	767726	767734	1	-	.	Binding "SWI4 conserved 1473"
II	Conserved	Doniger and Fay	767726	767733	1	+	.	Binding "SWI6 conserved 1474"
II	Conserved	Doniger and Fay	767729	767739	1	-	.	Binding "PHO2 conserved 1475"
II	Conserved	Doniger and Fay	767730	767739	1	+	.	Binding "SUT1 conserved 1476"
II	Conserved	Doniger and Fay	767736	767744	1	-	.	Binding "ROX1 conserved 1477"
II	Conserved	Doniger and Fay	768096	768108	1	+	.	Binding "ABF1 conserved 1478"
II	Conserved	Doniger and Fay	768097	768103	1	+	.	Binding "CBF1 conserved 1479"
II	Conserved	Doniger and Fay	768825	768835	1	-	.	Binding "SPT2 conserved (Convergent, not counted) 1480"
II	Conserved	Doniger and Fay	770473	770478	1	-	.	Binding "YHP1 conserved 1481"
II	Conserved	Doniger and Fay	770496	770501	1	-	.	Binding "AFT2 conserved 1482"
II	Conserved	Doniger and Fay	770497	770506	1	-	.	Binding "RAP1 conserved 1483"
II	Conserved	Doniger and Fay	770731	770743	1	-	.	Binding "ABF1 conserved 1484"
II	Conserved	Doniger and Fay	770755	770767	1	-	.	Binding "ABF1 conserved 1485"
II	Conserved	Doniger and Fay	771083	771087	1	-	.	Binding "HAP2 conserved 1486"
II	Conserved	Doniger and Fay	771100	771109	1	-	.	Binding "SUT1 conserved 1487"
II	Conserved	Doniger and Fay	771102	771111	1	-	.	Binding "UME6 conserved 1488"
II	Conserved	Doniger and Fay	771120	771128	1	-	.	Binding "RPN4 conserved 1489"
II	Conserved	Doniger and Fay	773643	773649	1	+	.	Binding "XBP1 conserved 1490"
II	Conserved	Doniger and Fay	773657	773666	1	-	.	Binding "NDT80 conserved 1491"
II	Conserved	Doniger and Fay	773661	773671	1	+	.	Binding "SUM1 conserved 1492"
II	Conserved	Doniger and Fay	773667	773676	1	+	.	Binding "RLM1 conserved 1493"
II	Conserved	Doniger and Fay	773722	773728	1	+	.	Binding "GAT1 conserved 1494"
II	Conserved	Doniger and Fay	773723	773727	1	+	.	Binding "DAL80 conserved 1495"
II	Conserved	Doniger and Fay	773723	773729	1	+	.	Binding "DAL82 conserved 1496"
II	Conserved	Doniger and Fay	773723	773728	1	+	.	Binding "GZF3 conserved 1497"
II	Conserved	Doniger and Fay	773724	773735	1	+	.	Binding "FKH2 conserved 1498"
II	Semi-conserved	Doniger and Fay	773751	773762	1	-	.	Binding "RLR1 loss on Scer with turnover -47 bp away 1499"
II	Conserved	Doniger and Fay	773860	773864	1	-	.	Binding "DAL80 conserved 1500"
II	Semi-conserved	Doniger and Fay	774457	774462	1	-	.	Binding "ASH1 loss on Scer 1501"
II	Conserved	Doniger and Fay	776380	776386	1	+	.	Binding "CBF1 conserved 1502"
II	Conserved	Doniger and Fay	776380	776379	1	-	.	Binding "INO2 conserved 1503"
II	Conserved	Doniger and Fay	776380	776386	1	-	.	Binding "PHO4 conserved 1504"
II	Conserved	Doniger and Fay	776405	776413	1	-	.	Binding "GLN3 conserved 1505"
II	Conserved	Doniger and Fay	776407	776413	1	-	.	Binding "DAL82 conserved 1506"
II	Conserved	Doniger and Fay	776408	776414	1	-	.	Binding "GAT1 conserved 1507"
II	Conserved	Doniger and Fay	776408	776413	1	-	.	Binding "GZF3 conserved 1508"
II	Conserved	Doniger and Fay	776409	776413	1	-	.	Binding "DAL80 conserved 1509"
II	Conserved	Doniger and Fay	776425	776430	1	+	.	Binding "MOT3 conserved 1510"
II	Conserved	Doniger and Fay	777861	777867	1	-	.	Binding "TEC1 conserved (Convergent, not counted) 1511"
II	Conserved	Doniger and Fay	779597	779608	1	+	.	Binding "FKH2 conserved 1512"
II	Conserved	Doniger and Fay	779616	779627	1	+	.	Binding "SIG1 conserved 1513"
II	Conserved	Doniger and Fay	782471	782477	1	-	.	Binding "MAC1 conserved 1514"
II	Semi-conserved	Doniger and Fay	782486	782494	1	+	.	Binding "YAP1 loss on Scer 1515"
II	Conserved	Doniger and Fay	783631	783642	1	+	.	Binding "THI2 conserved (Convergent, not counted) 1516"
II	Conserved	Doniger and Fay	784746	784753	1	+	.	Binding "SOK2 conserved 1517"
II	Conserved	Doniger and Fay	784767	784772	1	+	.	Binding "ASH1 conserved 1518"
II	Conserved	Doniger and Fay	784768	784773	1	+	.	Binding "BAS1 conserved 1519"
II	Conserved	Doniger and Fay	784768	784774	1	+	.	Binding "GCN4 conserved 1520"
II	Conserved	Doniger and Fay	788828	788834	1	-	.	Binding "RIM101 conserved 1521"
II	Semi-conserved	Doniger and Fay	788853	788859	1	+	.	Binding "GCN4 loss on Smik with turnover 110 bp away 1522"
II	Semi-conserved	Doniger and Fay	788854	788859	1	-	.	Binding "BAS1 loss on Smik 1523"
III	Conserved	Doniger and Fay	17002	17006	1	-	.	Binding "DAL80 conserved 1524"
III	Conserved	Doniger and Fay	17003	17011	1	-	.	Binding "GLN3 conserved 1525"
III	Conserved	Doniger and Fay	17005	17011	1	-	.	Binding "DAL82 conserved 1526"
III	Conserved	Doniger and Fay	17006	17012	1	-	.	Binding "GAT1 conserved 1527"
III	Conserved	Doniger and Fay	17006	17011	1	-	.	Binding "GZF3 conserved 1528"
III	Conserved	Doniger and Fay	17007	17011	1	-	.	Binding "DAL80 conserved 1529"
III	Conserved	Doniger and Fay	17008	17016	1	-	.	Binding "GLN3 conserved 1530"
III	Conserved	Doniger and Fay	17028	17032	1	+	.	Binding "DAL80 conserved 1531"
III	Conserved	Doniger and Fay	17139	17148	1	-	.	Binding "LEU3 conserved 1532"
III	Conserved	Doniger and Fay	17139	17148	1	+	.	Binding "UGA3 conserved 1533"
III	Conserved	Doniger and Fay	17140	17152	1	-	.	Binding "ABF1 conserved 1534"
III	Conserved	Doniger and Fay	17158	17166	1	+	.	Binding "SWI4 conserved 1535"
III	Conserved	Doniger and Fay	17159	17166	1	-	.	Binding "SWI6 conserved 1536"
III	Conserved	Doniger and Fay	17165	17176	1	-	.	Binding "RLR1 conserved 1537"
III	Conserved	Doniger and Fay	17208	17219	1	+	.	Binding "FKH2 conserved 1538"
III	Conserved	Doniger and Fay	17212	17219	1	-	.	Binding "FKH1 conserved 1539"
III	Conserved	Doniger and Fay	24403	24413	1	+	.	Binding "HAP1 conserved 1540"
III	Conserved	Doniger and Fay	24407	24411	1	-	.	Binding "DAL80 conserved 1541"
III	Conserved	Doniger and Fay	24478	24482	1	-	.	Binding "HAP2 conserved 1542"
III	Conserved	Doniger and Fay	24479	24487	1	+	.	Binding "YAP1 conserved 1543"
III	Conserved	Doniger and Fay	24639	24651	1	+	.	Binding "ABF1 conserved 1544"
III	Conserved	Doniger and Fay	24658	24667	1	-	.	Binding "UME6 conserved 1545"
III	Conserved	Doniger and Fay	24662	24668	1	+	.	Binding "REB1 conserved 1546"
III	Conserved	Doniger and Fay	24679	24687	1	+	.	Binding "RPN4 conserved 1547"
III	Conserved	Doniger and Fay	24681	24689	1	-	.	Binding "MSN2 conserved 1548"
III	Conserved	Doniger and Fay	27626	27632	1	+	.	Binding "DIG1 conserved 1549"
III	Conserved	Doniger and Fay	27784	27790	1	-	.	Binding "DIG1 conserved 1550"
III	Conserved	Doniger and Fay	27784	27790	1	-	.	Binding "STE12 conserved 1551"
III	Conserved	Doniger and Fay	27807	27813	1	-	.	Binding "STE12 conserved 1552"
III	Conserved	Doniger and Fay	27829	27835	1	-	.	Binding "DIG1 conserved 1553"
III	Conserved	Doniger and Fay	27829	27835	1	-	.	Binding "STE12 conserved 1554"
III	Conserved	Doniger and Fay	28977	28988	1	+	.	Binding "FKH2 conserved 1555"
III	Conserved	Doniger and Fay	28981	28988	1	-	.	Binding "FKH1 conserved 1556"
III	Conserved	Doniger and Fay	29083	29094	1	+	.	Binding "FKH2 conserved 1557"
III	Conserved	Doniger and Fay	29087	29094	1	-	.	Binding "FKH1 conserved 1558"
III	Conserved	Doniger and Fay	29116	29127	1	+	.	Binding "FKH2 conserved 1559"
III	Conserved	Doniger and Fay	29120	29127	1	-	.	Binding "FKH1 conserved 1560"
III	Conserved	Doniger and Fay	29186	29198	1	+	.	Binding "HSF1 conserved 1561"
III	Conserved	Doniger and Fay	29205	29210	1	-	.	Binding "SWI5 conserved 1562"
III	Conserved	Doniger and Fay	29306	29313	1	+	.	Binding "FKH1 conserved 1563"
III	Semi-conserved	Doniger and Fay	29741	29751	1	+	.	Binding "SUM1 loss on Scer 1564"
III	Conserved	Doniger and Fay	30422	30432	1	+	.	Binding "SUM1 conserved 1565"
III	Conserved	Doniger and Fay	30423	30432	1	+	.	Binding "NDT80 conserved 1566"
III	Conserved	Doniger and Fay	30555	30563	1	+	.	Binding "SWI4 conserved 1567"
III	Conserved	Doniger and Fay	30606	30618	1	-	.	Binding "MCM1 conserved 1568"
III	Conserved	Doniger and Fay	30606	30618	1	-	.	Binding "NDD1 conserved 1569"
III	Conserved	Doniger and Fay	31285	31291	1	+	.	Binding "REB1 conserved 1570"
III	Conserved	Doniger and Fay	31299	31305	1	-	.	Binding "DIG1 conserved 1571"
III	Conserved	Doniger and Fay	31299	31305	1	-	.	Binding "STE12 conserved 1572"
III	Conserved	Doniger and Fay	31322	31331	1	-	.	Binding "STB1 conserved 1573"
III	Semi-conserved	Doniger and Fay	34007	34018	1	+	.	Binding "YOX1 loss on Smik with turnover -12 bp away (Convergent, not counted) 1574"
III	Conserved	Doniger and Fay	34048	34058	1	-	.	Binding "SPT2 conserved (Convergent, not counted) 1575"
III	Conserved	Doniger and Fay	35449	35458	1	-	.	Binding "STB1 conserved 1576"
III	Conserved	Doniger and Fay	35481	35486	1	+	.	Binding "ADR1 conserved 1577"
III	Conserved	Doniger and Fay	35652	35660	1	+	.	Binding "ROX1 conserved 1578"
III	Conserved	Doniger and Fay	35698	35707	1	-	.	Binding "STB1 conserved 1579"
III	Conserved	Doniger and Fay	35698	35706	1	-	.	Binding "SWI4 conserved 1580"
III	Conserved	Doniger and Fay	35698	35705	1	+	.	Binding "SWI6 conserved 1581"
III	Semi-conserved	Doniger and Fay	35751	35756	1	-	.	Binding "MOT3 loss on Smik with turnover 10 bp away 1582"
III	Conserved	Doniger and Fay	35794	35801	1	-	.	Binding "SPT23 conserved 1583"
III	Conserved	Doniger and Fay	38858	38865	1	+	.	Binding "SPT23 conserved 1584"
III	Conserved	Doniger and Fay	38933	38941	1	+	.	Binding "ROX1 conserved 1585"
III	Conserved	Doniger and Fay	38980	38991	1	-	.	Binding "RLR1 conserved 1586"
III	Conserved	Doniger and Fay	38988	39000	1	-	.	Binding "HSF1 conserved 1587"
III	Conserved	Doniger and Fay	38993	39005	1	+	.	Binding "HSF1 conserved 1588"
III	Semi-conserved	Doniger and Fay	39002	39014	1	+	.	Binding "MCM1 loss on Smik 1589"
III	Semi-conserved	Doniger and Fay	39005	39017	1	-	.	Binding "NDD1 loss on Smik 1590"
III	Conserved	Doniger and Fay	39483	39490	1	+	.	Binding "FKH1 conserved 1591"
III	Conserved	Doniger and Fay	39483	39494	1	-	.	Binding "FKH2 conserved 1592"
III	Semi-conserved	Doniger and Fay	41099	41105	1	+	.	Binding "DAL82 loss on Smik with turnover 178 bp away 1593"
III	Conserved	Doniger and Fay	41155	41163	1	-	.	Binding "GLN3 conserved 1594"
III	Conserved	Doniger and Fay	41157	41163	1	-	.	Binding "DAL82 conserved 1595"
III	Conserved	Doniger and Fay	41158	41164	1	-	.	Binding "GAT1 conserved 1596"
III	Conserved	Doniger and Fay	41158	41163	1	-	.	Binding "GZF3 conserved 1597"
III	Conserved	Doniger and Fay	41159	41163	1	-	.	Binding "DAL80 conserved 1598"
III	Conserved	Doniger and Fay	41214	41222	1	+	.	Binding "MSN2 conserved 1599"
III	Conserved	Doniger and Fay	41229	41241	1	+	.	Binding "CSRE conserved 1600"
III	Conserved	Doniger and Fay	41233	41245	1	+	.	Binding "MCM1 conserved 1601"
III	Conserved	Doniger and Fay	41236	41248	1	-	.	Binding "NDD1 conserved 1602"
III	Conserved	Doniger and Fay	41236	41245	1	-	.	Binding "RPH1 conserved 1603"
III	Conserved	Doniger and Fay	41269	41275	1	+	.	Binding "GAT1 conserved 1604"
III	Conserved	Doniger and Fay	41270	41274	1	+	.	Binding "DAL80 conserved 1605"
III	Conserved	Doniger and Fay	41270	41276	1	+	.	Binding "DAL82 conserved 1606"
III	Conserved	Doniger and Fay	41270	41278	1	+	.	Binding "GLN3 conserved 1607"
III	Conserved	Doniger and Fay	41270	41275	1	+	.	Binding "GZF3 conserved 1608"
III	Semi-conserved	Doniger and Fay	41291	41302	1	-	.	Binding "RLR1 loss on Smik with turnover -444 bp away 1609"
III	Conserved	Doniger and Fay	41484	41492	1	-	.	Binding "ROX1 conserved 1610"
III	Conserved	Doniger and Fay	41674	41681	1	+	.	Binding "PHD1 conserved 1611"
III	Conserved	Doniger and Fay	41699	41706	1	-	.	Binding "SOK2 conserved 1612"
III	Conserved	Doniger and Fay	41701	41708	1	+	.	Binding "PHD1 conserved 1613"
III	Conserved	Doniger and Fay	41878	41884	1	+	.	Binding "YAP3 conserved 1614"
III	Conserved	Doniger and Fay	41992	41998	1	-	.	Binding "GCN4 conserved 1615"
III	Conserved	Doniger and Fay	41993	42003	1	+	.	Binding "SUM1 conserved 1616"
III	Conserved	Doniger and Fay	41994	42003	1	+	.	Binding "NDT80 conserved 1617"
III	Conserved	Doniger and Fay	42063	42072	1	-	.	Binding "NDT80 conserved 1618"
III	Conserved	Doniger and Fay	42063	42073	1	-	.	Binding "SUM1 conserved 1619"
III	Conserved	Doniger and Fay	47050	47062	1	+	.	Binding "ABF1 conserved 1620"
III	Conserved	Doniger and Fay	48518	48530	1	-	.	Binding "ABF1 conserved 1621"
III	Conserved	Doniger and Fay	52511	52523	1	+	.	Binding "ABF1 conserved 1622"
III	Conserved	Doniger and Fay	54916	54923	1	-	.	Binding "CIN5 conserved (Convergent, not counted) 1623"
III	Conserved	Doniger and Fay	56616	56623	1	+	.	Binding "FKH1 conserved 1624"
III	Conserved	Doniger and Fay	56713	56729	1	+	.	Binding "GAL4 conserved 1625"
III	Conserved	Doniger and Fay	56713	56729	1	+	.	Binding "GAL80 conserved 1626"
III	Conserved	Doniger and Fay	56713	56723	1	+	.	Binding "SNT2 conserved 1627"
III	Conserved	Doniger and Fay	56886	56891	1	+	.	Binding "MOT3 conserved 1628"
III	Conserved	Doniger and Fay	57109	57120	1	-	.	Binding "RLR1 conserved 1629"
III	Conserved	Doniger and Fay	57191	57197	1	+	.	Binding "STE12 conserved 1630"
III	Conserved	Doniger and Fay	57256	57261	1	+	.	Binding "SWI5 conserved 1631"
III	Conserved	Doniger and Fay	61331	61339	1	-	.	Binding "TYE7 conserved 1632"
III	Conserved	Doniger and Fay	61332	61338	1	+	.	Binding "CBF1 conserved 1633"
III	Conserved	Doniger and Fay	61332	61338	1	-	.	Binding "PHO4 conserved 1634"
III	Conserved	Doniger and Fay	61626	61630	1	+	.	Binding "DAL80 conserved 1635"
III	Conserved	Doniger and Fay	61640	61647	1	+	.	Binding "SOK2 conserved 1636"
III	Conserved	Doniger and Fay	61642	61647	1	+	.	Binding "MOT3 conserved 1637"
III	Conserved	Doniger and Fay	63335	63347	1	+	.	Binding "MCM1 conserved 1638"
III	Conserved	Doniger and Fay	63335	63347	1	+	.	Binding "NDD1 conserved 1639"
III	Conserved	Doniger and Fay	63339	63343	1	+	.	Binding "HAP2 conserved 1640"
III	Conserved	Doniger and Fay	63348	63359	1	+	.	Binding "THI2 conserved 1641"
III	Conserved	Doniger and Fay	64575	64580	1	-	.	Binding "MOT3 conserved (Convergent, not counted) 1642"
III	Conserved	Doniger and Fay	65719	65731	1	-	.	Binding "ABF1 conserved 1643"
III	Conserved	Doniger and Fay	65894	65905	1	+	.	Binding "RLR1 conserved 1644"
III	Conserved	Doniger and Fay	68509	68515	1	+	.	Binding "GCN4 conserved 1645"
III	Conserved	Doniger and Fay	68526	68532	1	-	.	Binding "GCN4 conserved 1646"
III	Conserved	Doniger and Fay	68527	68532	1	-	.	Binding "BAS1 conserved 1647"
III	Conserved	Doniger and Fay	68535	68545	1	+	.	Binding "FHL1 conserved 1648"
III	Conserved	Doniger and Fay	68536	68545	1	+	.	Binding "RAP1 conserved 1649"
III	Conserved	Doniger and Fay	68537	68536	1	-	.	Binding "INO2 conserved 1650"
III	Conserved	Doniger and Fay	68549	68554	1	-	.	Binding "YHP1 conserved 1651"
III	Conserved	Doniger and Fay	68565	68571	1	-	.	Binding "REB1 conserved 1652"
III	Conserved	Doniger and Fay	68570	68576	1	-	.	Binding "GCN4 conserved 1653"
III	Conserved	Doniger and Fay	68571	68576	1	-	.	Binding "BAS1 conserved 1654"
III	Conserved	Doniger and Fay	68573	68584	1	+	.	Binding "THI2 conserved 1655"
III	Conserved	Doniger and Fay	68580	68590	1	-	.	Binding "SPT2 conserved 1656"
III	Conserved	Doniger and Fay	68582	68588	1	-	.	Binding "GCN4 conserved 1657"
III	Conserved	Doniger and Fay	68583	68588	1	-	.	Binding "BAS1 conserved 1658"
III	Conserved	Doniger and Fay	68584	68589	1	-	.	Binding "ASH1 conserved 1659"
III	Conserved	Doniger and Fay	70001	70012	1	-	.	Binding "SIG1 conserved 1660"
III	Conserved	Doniger and Fay	70002	70011	1	-	.	Binding "STB1 conserved 1661"
III	Conserved	Doniger and Fay	70002	70010	1	-	.	Binding "SWI4 conserved 1662"
III	Conserved	Doniger and Fay	70002	70009	1	+	.	Binding "SWI6 conserved 1663"
III	Conserved	Doniger and Fay	71510	71515	1	-	.	Binding "AFT2 conserved 1664"
III	Conserved	Doniger and Fay	71510	71516	1	+	.	Binding "NRG1 conserved 1665"
III	Semi-conserved	Doniger and Fay	71554	71559	1	-	.	Binding "SKO1 loss on Smik with turnover -62 bp away 1666"
III	Conserved	Doniger and Fay	71595	71601	1	+	.	Binding "GCN4 conserved 1667"
III	Conserved	Doniger and Fay	71616	71622	1	+	.	Binding "DIG1 conserved 1668"
III	Conserved	Doniger and Fay	71616	71622	1	+	.	Binding "STE12 conserved 1669"
III	Conserved	Doniger and Fay	71627	71633	1	+	.	Binding "DIG1 conserved 1670"
III	Conserved	Doniger and Fay	71627	71633	1	+	.	Binding "STE12 conserved 1671"
III	Conserved	Doniger and Fay	71643	71649	1	+	.	Binding "DIG1 conserved 1672"
III	Conserved	Doniger and Fay	71643	71649	1	+	.	Binding "STE12 conserved 1673"
III	Conserved	Doniger and Fay	71794	71801	1	+	.	Binding "SPT23 conserved 1674"
III	Conserved	Doniger and Fay	78164	78172	1	-	.	Binding "GLN3 conserved 1675"
III	Conserved	Doniger and Fay	78166	78172	1	-	.	Binding "DAL82 conserved 1676"
III	Conserved	Doniger and Fay	78167	78173	1	-	.	Binding "GAT1 conserved 1677"
III	Conserved	Doniger and Fay	78167	78172	1	-	.	Binding "GZF3 conserved 1678"
III	Conserved	Doniger and Fay	78168	78172	1	-	.	Binding "DAL80 conserved 1679"
III	Conserved	Doniger and Fay	78233	78238	1	+	.	Binding "MOT3 conserved 1680"
III	Semi-conserved	Doniger and Fay	78342	78348	1	-	.	Binding "DAL82 loss on Smik with turnover -449 bp away 1681"
III	Semi-conserved	Doniger and Fay	78343	78349	1	-	.	Binding "GAT1 loss on Smik 1682"
III	Semi-conserved	Doniger and Fay	78343	78348	1	-	.	Binding "GZF3 loss on Smik with turnover 168 bp away 1683"
III	Conserved	Doniger and Fay	78540	78545	1	+	.	Binding "ADR1 conserved 1684"
III	Conserved	Doniger and Fay	78543	78553	1	+	.	Binding "FHL1 conserved 1685"
III	Conserved	Doniger and Fay	78543	78552	1	-	.	Binding "SFP1 conserved 1686"
III	Conserved	Doniger and Fay	78544	78553	1	+	.	Binding "RAP1 conserved 1687"
III	Conserved	Doniger and Fay	78609	78618	1	+	.	Binding "UME6 conserved 1688"
III	Conserved	Doniger and Fay	78611	78620	1	+	.	Binding "SUT1 conserved 1689"
III	Conserved	Doniger and Fay	78994	79003	1	+	.	Binding "STB1 conserved 1690"
III	Conserved	Doniger and Fay	78995	79001	1	+	.	Binding "MBP1 conserved 1691"
III	Conserved	Doniger and Fay	78995	79003	1	+	.	Binding "SWI4 conserved 1692"
III	Conserved	Doniger and Fay	78996	79003	1	-	.	Binding "SWI6 conserved 1693"
III	Conserved	Doniger and Fay	78997	79003	1	+	.	Binding "REB1 conserved 1694"
III	Conserved	Doniger and Fay	94392	94398	1	-	.	Binding "GCN4 conserved 1695"
III	Conserved	Doniger and Fay	94392	94400	1	+	.	Binding "YAP1 conserved 1696"
III	Conserved	Doniger and Fay	94427	94436	1	+	.	Binding "CAD1 conserved 1697"
III	Conserved	Doniger and Fay	94428	94436	1	+	.	Binding "YAP1 conserved 1698"
III	Conserved	Doniger and Fay	94457	94462	1	+	.	Binding "RTG3 conserved 1699"
III	Conserved	Doniger and Fay	94475	94481	1	+	.	Binding "REB1 conserved 1700"
III	Conserved	Doniger and Fay	94484	94489	1	+	.	Binding "AFT2 conserved 1701"
III	Conserved	Doniger and Fay	96099	96110	1	+	.	Binding "FKH2 conserved 1702"
III	Conserved	Doniger and Fay	96103	96110	1	-	.	Binding "FKH1 conserved 1703"
III	Conserved	Doniger and Fay	96105	96116	1	+	.	Binding "FKH2 conserved 1704"
III	Conserved	Doniger and Fay	96112	96120	1	-	.	Binding "ROX1 conserved 1705"
III	Conserved	Doniger and Fay	96115	96126	1	+	.	Binding "FKH2 conserved 1706"
III	Conserved	Doniger and Fay	96119	96126	1	-	.	Binding "FKH1 conserved 1707"
III	Conserved	Doniger and Fay	101200	101207	1	-	.	Binding "SPT23 conserved (Convergent, not counted) 1708"
III	Conserved	Doniger and Fay	101241	101248	1	-	.	Binding "CIN5 conserved (Convergent, not counted) 1709"
III	Conserved	Doniger and Fay	101363	101372	1	-	.	Binding "UME6 conserved (Convergent, not counted) 1710"
III	Conserved	Doniger and Fay	101364	101369	1	+	.	Binding "ADR1 conserved (Convergent, not counted) 1711"
III	Conserved	Doniger and Fay	101365	101370	1	+	.	Binding "AFT2 conserved (Convergent, not counted) 1712"
III	Conserved	Doniger and Fay	101365	101373	1	+	.	Binding "RCS1 conserved (Convergent, not counted) 1713"
III	Conserved	Doniger and Fay	101416	101421	1	-	.	Binding "GZF3 conserved (Convergent, not counted) 1714"
III	Conserved	Doniger and Fay	101417	101421	1	-	.	Binding "DAL80 conserved (Convergent, not counted) 1715"
III	Conserved	Doniger and Fay	103491	103503	1	+	.	Binding "ABF1 conserved 1716"
III	Conserved	Doniger and Fay	104494	104500	1	-	.	Binding "MBP1 conserved 1717"
III	Conserved	Doniger and Fay	104494	104501	1	-	.	Binding "SWI6 conserved 1718"
III	Conserved	Doniger and Fay	104504	104512	1	-	.	Binding "YAP1 conserved 1719"
III	Conserved	Doniger and Fay	109069	109074	1	+	.	Binding "YHP1 conserved 1720"
III	Conserved	Doniger and Fay	118437	118444	1	+	.	Binding "FKH1 conserved 1721"
III	Conserved	Doniger and Fay	118437	118448	1	-	.	Binding "FKH2 conserved 1722"
III	Conserved	Doniger and Fay	118548	118553	1	+	.	Binding "MOT3 conserved 1723"
III	Semi-conserved	Doniger and Fay	119213	119223	1	+	.	Binding "SPT2 loss on Scer-Spar with turnover 7 bp away (Convergent, not counted) 1724"
III	Conserved	Doniger and Fay	119402	119415	1	-	.	Binding "SMP1 conserved (Convergent, not counted) 1725"
III	Conserved	Doniger and Fay	119405	119414	1	+	.	Binding "RLM1 conserved (Convergent, not counted) 1726"
III	Conserved	Doniger and Fay	120398	120409	1	+	.	Binding "RLR1 conserved 1727"
III	Conserved	Doniger and Fay	120457	120463	1	+	.	Binding "DIG1 conserved 1728"
III	Conserved	Doniger and Fay	120636	120642	1	-	.	Binding "REB1 conserved 1729"
III	Conserved	Doniger and Fay	120648	120656	1	-	.	Binding "YAP1 conserved 1730"
III	Conserved	Doniger and Fay	120659	120668	1	-	.	Binding "CAD1 conserved 1731"
III	Conserved	Doniger and Fay	120659	120667	1	-	.	Binding "YAP1 conserved 1732"
III	Conserved	Doniger and Fay	120661	120667	1	+	.	Binding "ARR1 conserved 1733"
III	Conserved	Doniger and Fay	120661	120667	1	+	.	Binding "YAP3 conserved 1734"
III	Conserved	Doniger and Fay	120679	120688	1	+	.	Binding "STB5 conserved 1735"
III	Semi-conserved	Doniger and Fay	130412	130423	1	+	.	Binding "RLR1 loss on Scer(Convergent, not counted) 1736"
III	Conserved	Doniger and Fay	130431	130437	1	+	.	Binding "RGT1 conserved (Convergent, not counted) 1737"
III	Conserved	Doniger and Fay	131685	131692	1	+	.	Binding "PDR3 conserved 1738"
III	Conserved	Doniger and Fay	131690	131689	1	-	.	Binding "INO2 conserved 1739"
III	Conserved	Doniger and Fay	131701	131709	1	+	.	Binding "SKN7 conserved 1740"
III	Conserved	Doniger and Fay	131759	131765	1	-	.	Binding "DIG1 conserved 1741"
III	Conserved	Doniger and Fay	131759	131765	1	-	.	Binding "STE12 conserved 1742"
III	Conserved	Doniger and Fay	132042	132049	1	+	.	Binding "FKH1 conserved 1743"
III	Conserved	Doniger and Fay	132042	132053	1	-	.	Binding "FKH2 conserved 1744"
III	Conserved	Doniger and Fay	132173	132180	1	+	.	Binding "CIN5 conserved 1745"
III	Conserved	Doniger and Fay	132193	132197	1	-	.	Binding "DAL80 conserved 1746"
III	Conserved	Doniger and Fay	133359	133368	1	+	.	Binding "UME6 conserved 1747"
III	Conserved	Doniger and Fay	133442	133451	1	+	.	Binding "UME6 conserved 1748"
III	Conserved	Doniger and Fay	133444	133456	1	-	.	Binding "STP1 conserved 1749"
III	Conserved	Doniger and Fay	133505	133512	1	-	.	Binding "PHD1 conserved 1750"
III	Conserved	Doniger and Fay	133506	133514	1	-	.	Binding "MSN2 conserved 1751"
III	Conserved	Doniger and Fay	133556	133563	1	-	.	Binding "PHD1 conserved 1752"
III	Conserved	Doniger and Fay	133595	133600	1	-	.	Binding "SWI5 conserved 1753"
III	Conserved	Doniger and Fay	133611	133618	1	+	.	Binding "PDR3 conserved 1754"
III	Semi-conserved	Doniger and Fay	133622	133634	1	-	.	Binding "SIP4 loss on Smik 1755"
III	Conserved	Doniger and Fay	133639	133644	1	-	.	Binding "AFT2 conserved 1756"
III	Conserved	Doniger and Fay	133639	133645	1	+	.	Binding "NRG1 conserved 1757"
III	Conserved	Doniger and Fay	133688	133695	1	+	.	Binding "CIN5 conserved 1758"
III	Conserved	Doniger and Fay	137063	137073	1	+	.	Binding "HAP1 conserved 1759"
III	Conserved	Doniger and Fay	137101	137109	1	+	.	Binding "SWI4 conserved 1760"
III	Conserved	Doniger and Fay	137138	137142	1	-	.	Binding "DAL80 conserved 1761"
III	Conserved	Doniger and Fay	137186	137192	1	-	.	Binding "REB1 conserved 1762"
III	Conserved	Doniger and Fay	137200	137206	1	-	.	Binding "CBF1 conserved 1763"
III	Conserved	Doniger and Fay	137200	137199	1	+	.	Binding "INO2 conserved 1764"
III	Conserved	Doniger and Fay	137200	137206	1	+	.	Binding "PHO4 conserved 1765"
III	Semi-conserved	Doniger and Fay	137271	137276	1	-	.	Binding "AFT2 loss on Scer 1766"
III	Conserved	Doniger and Fay	137271	137281	1	-	.	Binding "FHL1 conserved 1767"
III	Conserved	Doniger and Fay	137271	137280	1	-	.	Binding "RAP1 conserved 1768"
III	Conserved	Doniger and Fay	137272	137281	1	+	.	Binding "SFP1 conserved 1769"
III	Conserved	Doniger and Fay	137316	137320	1	+	.	Binding "HAP2 conserved 1770"
III	Conserved	Doniger and Fay	137322	137332	1	+	.	Binding "SUM1 conserved 1771"
III	Conserved	Doniger and Fay	137323	137332	1	+	.	Binding "NDT80 conserved 1772"
III	Conserved	Doniger and Fay	137372	137378	1	-	.	Binding "XBP1 conserved 1773"
III	Conserved	Doniger and Fay	137375	137387	1	-	.	Binding "HSF1 conserved 1774"
III	Conserved	Doniger and Fay	137383	137389	1	+	.	Binding "TEC1 conserved 1775"
III	Conserved	Doniger and Fay	137409	137408	1	+	.	Binding "INO2 conserved 1776"
III	Conserved	Doniger and Fay	137439	137445	1	+	.	Binding "MAC1 conserved 1777"
III	Conserved	Doniger and Fay	137492	137498	1	+	.	Binding "OPI1 conserved 1778"
III	Conserved	Doniger and Fay	137544	137552	1	+	.	Binding "MSN2 conserved 1779"
III	Conserved	Doniger and Fay	137574	137580	1	+	.	Binding "STE12 conserved 1780"
III	Conserved	Doniger and Fay	137713	137724	1	+	.	Binding "RLR1 conserved 1781"
III	Conserved	Doniger and Fay	137714	137718	1	-	.	Binding "DAL80 conserved 1782"
III	Conserved	Doniger and Fay	137737	137743	1	+	.	Binding "DIG1 conserved 1783"
III	Conserved	Doniger and Fay	139008	139019	1	+	.	Binding "THI2 conserved (Convergent, not counted) 1784"
III	Conserved	Doniger and Fay	139020	139027	1	-	.	Binding "SPT23 conserved (Convergent, not counted) 1785"
III	Conserved	Doniger and Fay	139023	139034	1	+	.	Binding "RLR1 conserved (Convergent, not counted) 1786"
III	Conserved	Doniger and Fay	139104	139113	1	+	.	Binding "RLM1 conserved (Convergent, not counted) 1787"
III	Conserved	Doniger and Fay	139122	139126	1	-	.	Binding "DAL80 conserved (Convergent, not counted) 1788"
III	Conserved	Doniger and Fay	139134	139143	1	-	.	Binding "CAD1 conserved (Convergent, not counted) 1789"
III	Conserved	Doniger and Fay	139136	139144	1	+	.	Binding "YAP1 conserved (Convergent, not counted) 1790"
III	Semi-conserved	Doniger and Fay	141023	141033	1	+	.	Binding "SPT2 loss on Scer with turnover 25 bp away 1791"
III	Semi-conserved	Doniger and Fay	147696	147701	1	+	.	Binding "AFT2 loss on Smik with turnover 381 bp away 1792"
III	Semi-conserved	Doniger and Fay	147696	147704	1	+	.	Binding "RCS1 loss on Smik with turnover 378 bp away 1793"
III	Conserved	Doniger and Fay	147751	147759	1	+	.	Binding "ROX1 conserved 1794"
III	Conserved	Doniger and Fay	147783	147789	1	-	.	Binding "REB1 conserved 1795"
III	Conserved	Doniger and Fay	148007	148014	1	+	.	Binding "SPT23 conserved 1796"
III	Conserved	Doniger and Fay	154785	154791	1	+	.	Binding "RIM101 conserved 1797"
III	Conserved	Doniger and Fay	154806	154818	1	-	.	Binding "HSF1 conserved 1798"
III	Conserved	Doniger and Fay	154806	154817	1	+	.	Binding "THI2 conserved 1799"
III	Conserved	Doniger and Fay	156021	156027	1	-	.	Binding "STE12 conserved (Convergent, not counted) 1800"
III	Semi-conserved	Doniger and Fay	157184	157189	1	+	.	Binding "YHP1 loss on Spar with turnover 424 bp away 1801"
III	Semi-conserved	Doniger and Fay	157228	157239	1	+	.	Binding "SIG1 loss on Scer 1802"
III	Conserved	Doniger and Fay	157582	157590	1	-	.	Binding "YAP1 conserved 1803"
III	Conserved	Doniger and Fay	157583	157592	1	+	.	Binding "CAD1 conserved 1804"
III	Conserved	Doniger and Fay	157584	157590	1	+	.	Binding "YAP3 conserved 1805"
III	Conserved	Doniger and Fay	157611	157616	1	-	.	Binding "MOT3 conserved 1806"
III	Conserved	Doniger and Fay	157639	157645	1	+	.	Binding "NRG1 conserved 1807"
III	Conserved	Doniger and Fay	157672	157683	1	+	.	Binding "SIG1 conserved 1808"
III	Conserved	Doniger and Fay	157685	157692	1	+	.	Binding "PHD1 conserved 1809"
III	Conserved	Doniger and Fay	157759	157765	1	-	.	Binding "TEC1 conserved 1810"
III	Semi-conserved	Doniger and Fay	157876	157887	1	+	.	Binding "RLR1 loss on Scer-Spar with turnover -19 bp away 1811"
III	Conserved	Doniger and Fay	160552	160558	1	-	.	Binding "GCN4 conserved 1812"
III	Conserved	Doniger and Fay	172818	172825	1	-	.	Binding "CIN5 conserved 1813"
III	Conserved	Doniger and Fay	173374	173381	1	+	.	Binding "CIN5 conserved 1814"
III	Conserved	Doniger and Fay	173379	173389	1	+	.	Binding "SPT2 conserved 1815"
III	Conserved	Doniger and Fay	176583	176592	1	-	.	Binding "RPH1 conserved 1816"
III	Conserved	Doniger and Fay	176626	176638	1	+	.	Binding "ABF1 conserved 1817"
III	Conserved	Doniger and Fay	177257	177265	1	-	.	Binding "MET31 conserved 1818"
III	Conserved	Doniger and Fay	177274	177280	1	+	.	Binding "DIG1 conserved 1819"
III	Conserved	Doniger and Fay	177909	177921	1	+	.	Binding "HSF1 conserved 1820"
III	Conserved	Doniger and Fay	177912	177923	1	-	.	Binding "SIG1 conserved 1821"
III	Conserved	Doniger and Fay	178060	178067	1	-	.	Binding "SOK2 conserved 1822"
III	Conserved	Doniger and Fay	178155	178165	1	+	.	Binding "FHL1 conserved 1823"
III	Conserved	Doniger and Fay	178155	178164	1	-	.	Binding "SFP1 conserved 1824"
III	Conserved	Doniger and Fay	178156	178165	1	+	.	Binding "RAP1 conserved 1825"
III	Conserved	Doniger and Fay	178173	178183	1	-	.	Binding "FHL1 conserved 1826"
III	Conserved	Doniger and Fay	178173	178182	1	-	.	Binding "RAP1 conserved 1827"
III	Conserved	Doniger and Fay	178419	178424	1	-	.	Binding "MOT3 conserved 1828"
III	Conserved	Doniger and Fay	178427	178437	1	+	.	Binding "SUM1 conserved 1829"
III	Conserved	Doniger and Fay	178428	178437	1	+	.	Binding "NDT80 conserved 1830"
III	Conserved	Doniger and Fay	178445	178454	1	-	.	Binding "STB5 conserved 1831"
III	Conserved	Doniger and Fay	178989	178995	1	+	.	Binding "REB1 conserved 1832"
III	Semi-conserved	Doniger and Fay	179045	179053	1	-	.	Binding "MSN2 loss on Spar 1833"
III	Conserved	Doniger and Fay	186112	186117	1	+	.	Binding "YHP1 conserved 1834"
III	Conserved	Doniger and Fay	186199	186205	1	+	.	Binding "REB1 conserved 1835"
III	Conserved	Doniger and Fay	186239	186246	1	+	.	Binding "CIN5 conserved 1836"
III	Conserved	Doniger and Fay	186298	186303	1	+	.	Binding "ASH1 conserved 1837"
III	Conserved	Doniger and Fay	186333	186343	1	-	.	Binding "SPT2 conserved 1838"
III	Conserved	Doniger and Fay	190316	190321	1	+	.	Binding "YHP1 conserved 1839"
III	Conserved	Doniger and Fay	190451	190460	1	+	.	Binding "STB1 conserved 1840"
III	Conserved	Doniger and Fay	190478	190486	1	+	.	Binding "SWI4 conserved 1841"
III	Conserved	Doniger and Fay	190498	190509	1	-	.	Binding "RLR1 conserved 1842"
III	Conserved	Doniger and Fay	191694	191702	1	+	.	Binding "ROX1 conserved (Convergent, not counted) 1843"
III	Conserved	Doniger and Fay	191695	191704	1	+	.	Binding "RLM1 conserved (Convergent, not counted) 1844"
III	Conserved	Doniger and Fay	191695	191708	1	-	.	Binding "SMP1 conserved (Convergent, not counted) 1845"
III	Conserved	Doniger and Fay	197539	197545	1	+	.	Binding "ARR1 conserved 1846"
III	Conserved	Doniger and Fay	197539	197545	1	+	.	Binding "YAP3 conserved 1847"
III	Semi-conserved	Doniger and Fay	197590	197601	1	+	.	Binding "RLR1 loss on Scer-Spar 1848"
III	Conserved	Doniger and Fay	205502	205506	1	+	.	Binding "HAP2 conserved 1849"
III	Conserved	Doniger and Fay	205509	205521	1	-	.	Binding "NDD1 conserved 1850"
III	Conserved	Doniger and Fay	205535	205541	1	-	.	Binding "REB1 conserved 1851"
III	Conserved	Doniger and Fay	206173	206184	1	-	.	Binding "RLR1 conserved 1852"
III	Conserved	Doniger and Fay	206702	206708	1	-	.	Binding "DAL82 conserved 1853"
III	Conserved	Doniger and Fay	206703	206709	1	-	.	Binding "GAT1 conserved 1854"
III	Conserved	Doniger and Fay	206703	206708	1	-	.	Binding "GZF3 conserved 1855"
III	Conserved	Doniger and Fay	206704	206708	1	-	.	Binding "DAL80 conserved 1856"
III	Conserved	Doniger and Fay	206710	206719	1	+	.	Binding "NDT80 conserved 1857"
III	Conserved	Doniger and Fay	206763	206774	1	-	.	Binding "RLR1 conserved 1858"
III	Conserved	Doniger and Fay	211751	211757	1	-	.	Binding "REB1 conserved 1859"
III	Conserved	Doniger and Fay	211781	211789	1	-	.	Binding "ROX1 conserved 1860"
III	Conserved	Doniger and Fay	211785	211793	1	-	.	Binding "RCS1 conserved 1861"
III	Conserved	Doniger and Fay	211788	211793	1	-	.	Binding "AFT2 conserved 1862"
III	Conserved	Doniger and Fay	211797	211803	1	+	.	Binding "NRG1 conserved 1863"
III	Conserved	Doniger and Fay	213945	213951	1	+	.	Binding "REB1 conserved 1864"
III	Conserved	Doniger and Fay	216488	216500	1	-	.	Binding "ABF1 conserved 1865"
III	Conserved	Doniger and Fay	216513	216519	1	-	.	Binding "GCN4 conserved 1866"
III	Conserved	Doniger and Fay	216514	216519	1	-	.	Binding "BAS1 conserved 1867"
III	Semi-conserved	Doniger and Fay	216523	216534	1	-	.	Binding "RLR1 loss on Scer 1868"
III	Conserved	Doniger and Fay	220159	220168	1	-	.	Binding "NDT80 conserved 1869"
III	Conserved	Doniger and Fay	220159	220169	1	-	.	Binding "SUM1 conserved 1870"
III	Conserved	Doniger and Fay	220162	220168	1	-	.	Binding "GCN4 conserved 1871"
III	Semi-conserved	Doniger and Fay	220190	220201	1	+	.	Binding "RLR1 loss on Scer with turnover 22 bp away 1872"
III	Conserved	Doniger and Fay	220384	220393	1	+	.	Binding "RLM1 conserved 1873"
III	Conserved	Doniger and Fay	223228	223238	1	+	.	Binding "PHO2 conserved 1874"
III	Conserved	Doniger and Fay	223365	223374	1	+	.	Binding "STB1 conserved 1875"
III	Conserved	Doniger and Fay	223408	223407	1	-	.	Binding "INO2 conserved 1876"
III	Conserved	Doniger and Fay	225307	225316	1	+	.	Binding "UME6 conserved 1877"
III	Conserved	Doniger and Fay	225309	225318	1	+	.	Binding "SUT1 conserved 1878"
III	Conserved	Doniger and Fay	225328	225336	1	+	.	Binding "RPN4 conserved 1879"
III	Conserved	Doniger and Fay	225393	225399	1	-	.	Binding "REB1 conserved 1880"
III	Conserved	Doniger and Fay	228797	228803	1	-	.	Binding "PHO4 conserved 1881"
III	Conserved	Doniger and Fay	228802	228813	1	-	.	Binding "YOX1 conserved 1882"
III	Conserved	Doniger and Fay	228869	228881	1	-	.	Binding "ABF1 conserved 1883"
III	Conserved	Doniger and Fay	228904	228913	1	+	.	Binding "STB1 conserved 1884"
III	Conserved	Doniger and Fay	228905	228911	1	+	.	Binding "MBP1 conserved 1885"
III	Conserved	Doniger and Fay	228905	228913	1	+	.	Binding "SWI4 conserved 1886"
III	Conserved	Doniger and Fay	228906	228913	1	-	.	Binding "SWI6 conserved 1887"
III	Conserved	Doniger and Fay	228924	228930	1	+	.	Binding "MBP1 conserved 1888"
III	Conserved	Doniger and Fay	228925	228932	1	-	.	Binding "SWI6 conserved 1889"
III	Conserved	Doniger and Fay	228936	228945	1	+	.	Binding "STB1 conserved 1890"
III	Conserved	Doniger and Fay	228937	228943	1	+	.	Binding "MBP1 conserved 1891"
III	Conserved	Doniger and Fay	228937	228945	1	+	.	Binding "SWI4 conserved 1892"
III	Conserved	Doniger and Fay	228938	228945	1	-	.	Binding "SWI6 conserved 1893"
III	Conserved	Doniger and Fay	228987	228993	1	+	.	Binding "MBP1 conserved 1894"
III	Conserved	Doniger and Fay	229020	229026	1	+	.	Binding "DIG1 conserved 1895"
III	Conserved	Doniger and Fay	229020	229026	1	+	.	Binding "STE12 conserved 1896"
III	Conserved	Doniger and Fay	229035	229041	1	+	.	Binding "MBP1 conserved 1897"
III	Conserved	Doniger and Fay	229073	229078	1	-	.	Binding "ADR1 conserved 1898"
III	Conserved	Doniger and Fay	229108	229118	1	-	.	Binding "SPT2 conserved 1899"
III	Conserved	Doniger and Fay	229128	229133	1	+	.	Binding "YHP1 conserved 1900"
III	Conserved	Doniger and Fay	229133	229144	1	+	.	Binding "THI2 conserved 1901"
III	Conserved	Doniger and Fay	231003	231014	1	+	.	Binding "RLR1 conserved 1902"
III	Conserved	Doniger and Fay	231058	231069	1	-	.	Binding "THI2 conserved 1903"
III	Conserved	Doniger and Fay	231100	231105	1	+	.	Binding "SWI5 conserved 1904"
III	Conserved	Doniger and Fay	236395	236402	1	+	.	Binding "FKH1 conserved 1905"
III	Conserved	Doniger and Fay	236615	236627	1	+	.	Binding "ABF1 conserved 1906"
III	Conserved	Doniger and Fay	236967	236973	1	-	.	Binding "REB1 conserved 1907"
III	Conserved	Doniger and Fay	238773	238783	1	-	.	Binding "FHL1 conserved 1908"
III	Conserved	Doniger and Fay	238773	238782	1	-	.	Binding "RAP1 conserved 1909"
III	Conserved	Doniger and Fay	238774	238783	1	+	.	Binding "SFP1 conserved 1910"
III	Conserved	Doniger and Fay	239033	239038	1	+	.	Binding "GZF3 conserved 1911"
III	Conserved	Doniger and Fay	240059	240069	1	-	.	Binding "SPT2 conserved (Convergent, not counted) 1912"
III	Conserved	Doniger and Fay	240667	240679	1	-	.	Binding "ABF1 conserved 1913"
III	Conserved	Doniger and Fay	242487	242493	1	+	.	Binding "REB1 conserved 1914"
III	Semi-conserved	Doniger and Fay	246704	246711	1	+	.	Binding "CIN5 loss on Smik 1915"
III	Conserved	Doniger and Fay	246847	246855	1	+	.	Binding "SKN7 conserved 1916"
III	Conserved	Doniger and Fay	246858	246866	1	+	.	Binding "MSN2 conserved 1917"
III	Conserved	Doniger and Fay	246884	246888	1	+	.	Binding "DAL80 conserved 1918"
III	Conserved	Doniger and Fay	248979	248985	1	+	.	Binding "RGT1 conserved 1919"
III	Conserved	Doniger and Fay	250130	250137	1	-	.	Binding "CIN5 conserved 1920"
III	Conserved	Doniger and Fay	250147	250152	1	-	.	Binding "YHP1 conserved 1921"
III	Conserved	Doniger and Fay	252727	252738	1	-	.	Binding "RLR1 conserved 1922"
III	Conserved	Doniger and Fay	252738	252752	1	+	.	Binding "MET4 conserved 1923"
III	Conserved	Doniger and Fay	252744	252752	1	-	.	Binding "SWI4 conserved 1924"
III	Conserved	Doniger and Fay	254270	254280	1	-	.	Binding "SNT2 conserved 1925"
III	Conserved	Doniger and Fay	258766	258774	1	+	.	Binding "RPN4 conserved 1926"
III	Semi-conserved	Doniger and Fay	259485	259495	1	+	.	Binding "HAP1 loss on Scer 1927"
III	Semi-conserved	Doniger and Fay	259970	259980	1	-	.	Binding "SPT2 loss on Scer(Convergent, not counted) 1928"
III	Conserved	Doniger and Fay	259975	259974	1	+	.	Binding "INO2 conserved (Convergent, not counted) 1929"
III	Conserved	Doniger and Fay	260185	260190	1	-	.	Binding "MOT3 conserved (Convergent, not counted) 1930"
III	Conserved	Doniger and Fay	262485	262493	1	-	.	Binding "GLN3 conserved 1931"
III	Conserved	Doniger and Fay	262487	262493	1	-	.	Binding "DAL82 conserved 1932"
III	Conserved	Doniger and Fay	262488	262494	1	-	.	Binding "GAT1 conserved 1933"
III	Conserved	Doniger and Fay	262488	262493	1	-	.	Binding "GZF3 conserved 1934"
III	Conserved	Doniger and Fay	262489	262493	1	-	.	Binding "DAL80 conserved 1935"
III	Conserved	Doniger and Fay	262508	262516	1	-	.	Binding "ROX1 conserved 1936"
III	Conserved	Doniger and Fay	262591	262597	1	+	.	Binding "CBF1 conserved 1937"
III	Conserved	Doniger and Fay	262591	262590	1	-	.	Binding "INO2 conserved 1938"
III	Conserved	Doniger and Fay	262591	262597	1	-	.	Binding "PHO4 conserved 1939"
III	Conserved	Doniger and Fay	262599	262604	1	-	.	Binding "SWI5 conserved 1940"
III	Conserved	Doniger and Fay	262637	262642	1	+	.	Binding "ADR1 conserved 1941"
III	Conserved	Doniger and Fay	262665	262672	1	+	.	Binding "FKH1 conserved 1942"
III	Conserved	Doniger and Fay	262665	262676	1	-	.	Binding "FKH2 conserved 1943"
III	Conserved	Doniger and Fay	262694	262705	1	-	.	Binding "SIG1 conserved 1944"
III	Conserved	Doniger and Fay	262697	262704	1	+	.	Binding "FKH1 conserved 1945"
III	Conserved	Doniger and Fay	262899	262906	1	+	.	Binding "FKH1 conserved 1946"
III	Conserved	Doniger and Fay	262907	262914	1	+	.	Binding "FKH1 conserved 1947"
III	Conserved	Doniger and Fay	263222	263229	1	+	.	Binding "FKH1 conserved 1948"
III	Conserved	Doniger and Fay	263222	263233	1	-	.	Binding "FKH2 conserved 1949"
III	Conserved	Doniger and Fay	263247	263254	1	+	.	Binding "FKH1 conserved 1950"
III	Conserved	Doniger and Fay	263247	263258	1	-	.	Binding "FKH2 conserved 1951"
III	Conserved	Doniger and Fay	263285	263292	1	+	.	Binding "SPT23 conserved 1952"
III	Conserved	Doniger and Fay	264545	264556	1	+	.	Binding "RLR1 conserved 1953"
III	Conserved	Doniger and Fay	264566	264572	1	-	.	Binding "REB1 conserved 1954"
III	Conserved	Doniger and Fay	264566	264574	1	-	.	Binding "SWI4 conserved 1955"
III	Conserved	Doniger and Fay	264583	264594	1	+	.	Binding "SIG1 conserved 1956"
III	Conserved	Doniger and Fay	264895	264903	1	-	.	Binding "TYE7 conserved 1957"
III	Conserved	Doniger and Fay	264896	264902	1	+	.	Binding "CBF1 conserved 1958"
III	Conserved	Doniger and Fay	264897	264896	1	+	.	Binding "INO2 conserved 1959"
III	Conserved	Doniger and Fay	264897	264903	1	+	.	Binding "PHO4 conserved 1960"
III	Conserved	Doniger and Fay	264934	264942	1	-	.	Binding "ROX1 conserved 1961"
III	Conserved	Doniger and Fay	274190	274200	1	-	.	Binding "SNT2 conserved 1962"
III	Semi-conserved	Doniger and Fay	274211	274223	1	-	.	Binding "NDD1 loss on Smik with turnover -1008 bp away 1963"
III	Conserved	Doniger and Fay	274285	274293	1	-	.	Binding "MET31 conserved 1964"
III	Conserved	Doniger and Fay	276650	276661	1	+	.	Binding "FKH2 conserved (Convergent, not counted) 1965"
III	Conserved	Doniger and Fay	276654	276661	1	-	.	Binding "FKH1 conserved (Convergent, not counted) 1966"
III	Conserved	Doniger and Fay	279932	279938	1	+	.	Binding "CBF1 conserved 1967"
III	Conserved	Doniger and Fay	279932	279938	1	-	.	Binding "PHO4 conserved 1968"
III	Conserved	Doniger and Fay	279932	279940	1	+	.	Binding "TYE7 conserved 1969"
III	Conserved	Doniger and Fay	279967	279975	1	+	.	Binding "SWI4 conserved 1970"
III	Conserved	Doniger and Fay	279968	279975	1	-	.	Binding "SWI6 conserved 1971"
III	Conserved	Doniger and Fay	279986	279996	1	-	.	Binding "PDR1 conserved 1972"
III	Conserved	Doniger and Fay	279990	279999	1	-	.	Binding "UME6 conserved 1973"
III	Conserved	Doniger and Fay	279992	280000	1	-	.	Binding "RPN4 conserved 1974"
III	Conserved	Doniger and Fay	280025	280036	1	+	.	Binding "FKH2 conserved 1975"
III	Conserved	Doniger and Fay	280028	280032	1	+	.	Binding "DAL80 conserved 1976"
III	Conserved	Doniger and Fay	286611	286617	1	-	.	Binding "REB1 conserved 1977"
III	Conserved	Doniger and Fay	287992	287999	1	+	.	Binding "FKH1 conserved (Convergent, not counted) 1978"
III	Conserved	Doniger and Fay	287992	288003	1	-	.	Binding "FKH2 conserved (Convergent, not counted) 1979"
III	Conserved	Doniger and Fay	287995	288000	1	+	.	Binding "ASH1 conserved (Convergent, not counted) 1980"
III	Conserved	Doniger and Fay	288006	288017	1	+	.	Binding "FKH2 conserved (Convergent, not counted) 1981"
III	Conserved	Doniger and Fay	288008	288013	1	+	.	Binding "SKO1 conserved (Convergent, not counted) 1982"
III	Conserved	Doniger and Fay	288010	288017	1	-	.	Binding "FKH1 conserved (Convergent, not counted) 1983"
IV	Conserved	Doniger and Fay	28885	28894	1	-	.	Binding "UME6 conserved 1984"
IV	Conserved	Doniger and Fay	28890	28900	1	+	.	Binding "HAP1 conserved 1985"
IV	Conserved	Doniger and Fay	30533	30539	1	-	.	Binding "DAL82 conserved 1986"
IV	Conserved	Doniger and Fay	30534	30540	1	-	.	Binding "GAT1 conserved 1987"
IV	Conserved	Doniger and Fay	30534	30539	1	-	.	Binding "GZF3 conserved 1988"
IV	Conserved	Doniger and Fay	30535	30539	1	-	.	Binding "DAL80 conserved 1989"
IV	Conserved	Doniger and Fay	30575	30584	1	+	.	Binding "STB5 conserved 1990"
IV	Conserved	Doniger and Fay	30577	30582	1	-	.	Binding "BAS1 conserved 1991"
IV	Conserved	Doniger and Fay	30581	30585	1	+	.	Binding "DAL80 conserved 1992"
IV	Conserved	Doniger and Fay	30615	30621	1	+	.	Binding "GAT1 conserved 1993"
IV	Conserved	Doniger and Fay	30616	30620	1	+	.	Binding "DAL80 conserved 1994"
IV	Conserved	Doniger and Fay	30616	30622	1	+	.	Binding "DAL82 conserved 1995"
IV	Conserved	Doniger and Fay	30616	30621	1	+	.	Binding "GZF3 conserved 1996"
IV	Conserved	Doniger and Fay	30630	30636	1	+	.	Binding "GAT1 conserved 1997"
IV	Conserved	Doniger and Fay	30631	30635	1	+	.	Binding "DAL80 conserved 1998"
IV	Conserved	Doniger and Fay	30631	30637	1	+	.	Binding "DAL82 conserved 1999"
IV	Conserved	Doniger and Fay	30631	30639	1	+	.	Binding "GLN3 conserved 2000"
IV	Conserved	Doniger and Fay	30631	30636	1	+	.	Binding "GZF3 conserved 2001"
IV	Conserved	Doniger and Fay	32113	32121	1	-	.	Binding "GLN3 conserved 2002"
IV	Conserved	Doniger and Fay	32115	32121	1	-	.	Binding "DAL82 conserved 2003"
IV	Conserved	Doniger and Fay	32116	32122	1	-	.	Binding "GAT1 conserved 2004"
IV	Conserved	Doniger and Fay	32116	32121	1	-	.	Binding "GZF3 conserved 2005"
IV	Conserved	Doniger and Fay	32117	32121	1	-	.	Binding "DAL80 conserved 2006"
IV	Conserved	Doniger and Fay	32188	32193	1	+	.	Binding "YHP1 conserved 2007"
IV	Conserved	Doniger and Fay	33302	33309	1	+	.	Binding "CIN5 conserved (Convergent, not counted) 2008"
[truncated: 14,303 more rows]
